# Supplementary material for: Photoredox-catalyzed redox-neutral difluoroalkylation to construct perfluoroketones with difluoroenoxysilanes
Source: Royal Society of Chemistry journal article supplement (doi:10.1039/d1ob01530c), 2021-01-01

Supporting Information

**Photoredox-catalyzed Redox-Neutral Difluoroalkylation to Construct  
Perfluoroketone with Difluoroenoxysilanes**

Jian-Yu Zou, Yu-Zhao Wang, Wen-Hui Sun, Wu-Jie Lin, Xue-Yuan Liu\*

State Key Laboratory of Applied Organic Chemistry, College of Chemistry and Chemical  
Engineering, Lanzhou University, Lanzhou, 730000, People's Republic of China

E-mail: [liuxuey@lzu.edu.cn](mailto:liuxuey@lzu.edu.cn)

## Table of Contents

|                                                                                                                    |     |
|--------------------------------------------------------------------------------------------------------------------|-----|
| 1. General information.....                                                                                        | S2  |
| 2. General procedure for the synthesis of 1a – 1h.....                                                             | S2  |
| 3. General procedure for the synthesis of 2a – 2o.....                                                             | S2  |
| 4. Typical procedure for the synthesis of 3aa – 3ja, 3ab – 3an.....                                                | S2  |
| 5. Typical procedure for the synthesis of 3ka – 3la .....                                                          | S3  |
| 6. Typical procedure for gram-scale synthesis with 0.01 mol % catalyst loading .....                               | S3  |
| 7. Condition Optimization for Difluoroalkylation.....                                                              | S3  |
| 8. Typical reaction set up .....                                                                                   | S5  |
| 9. Mechanism studies.....                                                                                          | S5  |
| 10. Compounds characterization .....                                                                               | S8  |
| 11. Reference .....                                                                                                | S15 |
| 12. <sup>1</sup> H NMR, <sup>13</sup> C NMR and <sup>19</sup> F NMR spectra of all new products <sup>a</sup> ..... | S16 |

## 1. General information

Analytical TLC was performed with silica gel GF254 plates. A 200-300 mesh silica gel was used for column chromatography. Solvents were distilled prior to use and were not deaerated before we used. All chemicals were used as received from commercial resources without further purification unless otherwise stated.  $^1\text{H}$  NMR spectra were recorded on Bruker AVANCE III 400 and INOVA instruments with 400 and 600 MHz frequencies, and  $^{13}\text{C}$  NMR spectra were recorded on Bruker AVANCE III 400 and INOVA instruments with 400 and 600 MHz with 101 and 151 MHz frequencies.  $^{19}\text{F}$  NMR spectra were recorded on a Bruker AVANCE III 400 spectrometer with a  $^{19}\text{F}$  operating frequency of 376 MHz. The chemical shifts in  $^1\text{H}$  NMR spectra were determined with  $\text{Si}(\text{CH}_3)_4$  as the internal standard ( $\delta = 0.00$  ppm); the chemical shifts in  $^{13}\text{C}$  NMR spectra were determined based on the chemical shift of  $\text{CDCl}_3$  ( $\delta = 77.0$  ppm). The following abbreviations were used to explain the multiplicities: s = singlet, d = doublet, t = triplet, dd = doublet of doublets, q = quartet, m = multiplet, dt = triplet of doublets. HR-MS was obtained using a Q-TOF instrument equipped with an ESI source.

## 2. General procedure for the synthesis of 1a – 1h

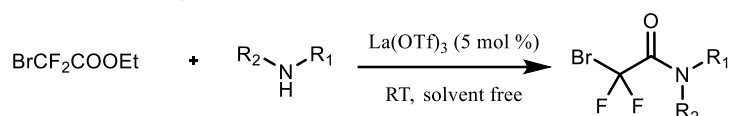

Compound **1** was prepared according to the literature.<sup>1</sup> A 10 mL reaction tube equipped with a magnetic stir bar was added with catalyst  $\text{La}(\text{OTf})_3$  (0.5 mmol, 5 mol %). Then the tube was pump and refilled with the Ar three times. The  $\text{BrCF}_2\text{COOEt}$  (12 mmol, 1.2 equiv.) and amine (10 mmol, 1 equiv.) was added. The reaction was stirred at room temperature until the amine was exhausted. The reaction was purified by silica gel column chromatography to afford the products (**1a-1h**).

## 3. General procedure for the synthesis of 2a – 2o

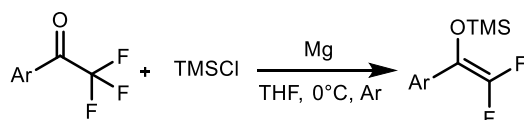

Compound **2** was prepared according to the literature.<sup>2</sup> To a three-necked 50 mL round-bottomed flask equipped with a magnetic stir bar was added Mg (40 mmol, 4 equiv.). The flask was pump and refilled with Ar three times and TMSCl (40 mmol, 4 equiv.) and THF (25 mL) were added. Then the reaction was cooled to  $0^\circ\text{C}$  and trifluoroacetophenone (10 mmol, 1 equiv.) was added dropwise for almost 10 min. The reaction was stirred for 30 min at  $0^\circ\text{C}$ . After evaporation of solvent, the residue was added hexane (50 mL) and filtered. The filtrate was concentrated to afford the products without additional purification (**2a-2o**).

## 4. Typical procedure for the synthesis of 3aa – 3ja, 3ab – 3an

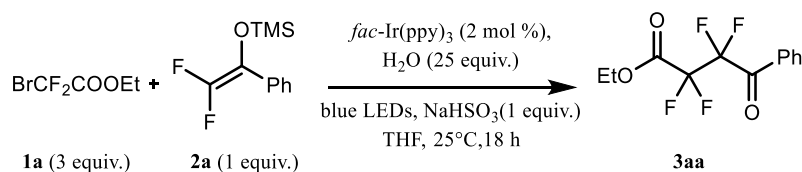

An over-dried Schlenk tube equipped with a magnetic stir bar was added with  $\text{fac-Ir}(\text{ppy})_3$  (0.004 mmol, 2 mol %) and  $\text{NaHSO}_3$  (0.2 mmol, 1 equiv.). The tube was evacuated and

backfilled with argon for three times. A solution of BrCF<sub>2</sub>COOEt (0.6 mmol, 3 equiv.), H<sub>2</sub>O (5 mmol, 25 equiv.) and difluoroenoxyisilane (0.2 mmol, 1 equiv.) in anhydrous THF (2 mL) was added via syringe. The reaction was stirred at room temperature for 18 h under the blue LEDs irradiation ( $\lambda = 450 \pm 15$  nm, 3 W electrical power, 3cm away). After the reaction, the residue was concentrated and purified by flash chromatography on silica gel to afford the corresponding product **3aa**.

### 5. Typical procedure for the synthesis of **3ka** – **3la**

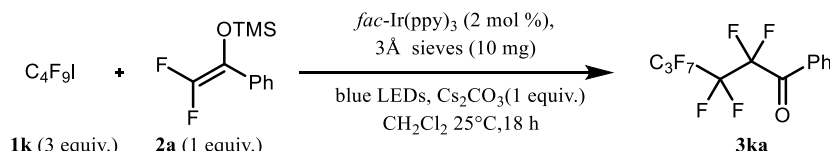

An over-dried Schlenk tube equipped with a magnetic stir bar was added with *fac*-Ir(ppy)<sub>3</sub> (0.004 mmol, 2 mol %), 3 Å sieve (10 mg) and Cs<sub>2</sub>CO<sub>3</sub> (0.2 mmol, 1 equiv.). The tube was evacuated and backfilled with argon for three times. A solution of C<sub>4</sub>F<sub>9</sub>I (0.6 mmol, 3 equiv.), and difluoroenoxyisilane (0.2 mmol, 1 equiv.) in anhydrous CH<sub>2</sub>Cl<sub>2</sub> (2 mL) was added via syringe. The reaction was stirred at room temperature for 18 h under the blue LEDs irradiation ( $\lambda = 450 \pm 15$  nm, 3 W electrical power, 3cm away). After the reaction, the residue was concentrated and purified by flash chromatography on silica gel to afford the corresponding product **3aa**.

### 6. Typical procedure for gram-scale synthesis with 0.01 mol % catalyst loading

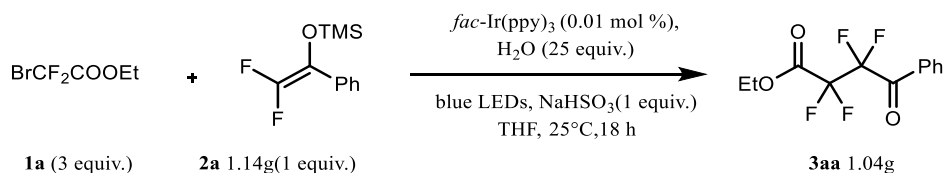

A 100 mL round bottom flask equipped with a magnetic stir bar was added with NaHSO<sub>3</sub> (5 mmol, 1 equiv.). The round bottom flask was evacuated and backfilled with argon for three times. A solution of BrCF<sub>2</sub>COOEt (15 mmol, 3 equiv.), H<sub>2</sub>O (125 mmol, 25 equiv.) difluoroenoxyisilane (5 mmol, 1 equiv.) and *fac*-Ir(ppy)<sub>3</sub> (0.0005 mmol, 0.01 mol %) in anhydrous THF (50 mL) was added via syringe. The reaction was stirred at room temperature for 18 h under the blue LEDs irradiation ( $\lambda = 450 \pm 15$  nm, 3 W electrical power, 3cm away). After the reaction, the residue was concentrated and purified by flash chromatography on silica gel to afford the corresponding product **3aa**.

### 7. Condition Optimization for Difluoroalkylation

**Table S1. Screen of ratio for difluoroalkylation**

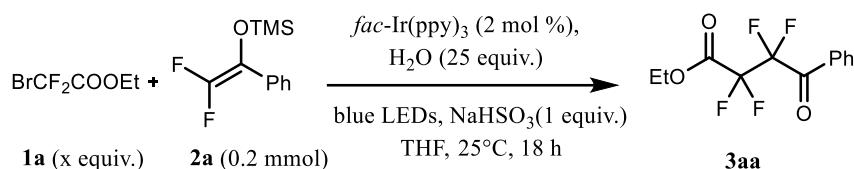

| entry | 1a (x equiv.) | 3aa (%) <sup>a</sup> |
|-------|---------------|----------------------|
| 1     | 1             | 50                   |
| 2     | 1.5           | 67                   |

|   |     |    |
|---|-----|----|
| 3 | 2   | 75 |
| 4 | 2.5 | 80 |
| 5 | 3   | 85 |

<sup>a</sup>Reaction conditions: **1a** (x equiv.), **2a** (0.2 mmol), *fac*-Ir(ppy)<sub>3</sub> (2 mol %), NaHSO<sub>3</sub> (1 equiv.), H<sub>2</sub>O (25 equiv.) THF (2 mL), irradiation with visible light under an Ar atmosphere at room temperature, 18 h. Yields determined by <sup>19</sup>F NMR using Benzotrifluoride as an internal standard.

**Table S2. Screen of additive for difluoroalkylation**

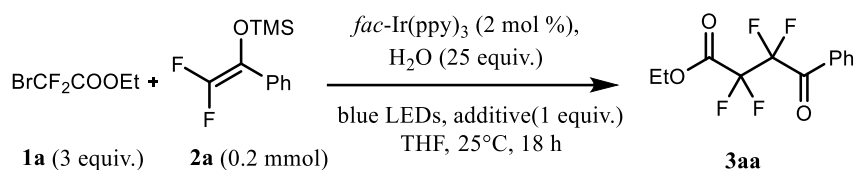

| entry | additive                        | 3aa (%) <sup>a</sup> |
|-------|---------------------------------|----------------------|
| 1     | NaHSO <sub>3</sub>              | 83                   |
| 2     | K <sub>2</sub> CO <sub>3</sub>  | 45                   |
| 3     | Cs <sub>2</sub> CO <sub>3</sub> | 50                   |
| 4     | NaHCO <sub>3</sub>              | 51                   |
| 5     | KOAc                            | 49                   |

<sup>a</sup>Reaction conditions: **1a** (3 equiv.), **2a** (0.2 mmol), *fac*-Ir(ppy)<sub>3</sub> (2 mol %), additive (1 equiv.), H<sub>2</sub>O (25 equiv.) THF (2 mL), irradiation with visible light under an Ar atmosphere at room temperature, 18 h. Yields determined by <sup>19</sup>F NMR using Benzotrifluoride as an internal standard.

**Table S3. Screen of reaction time for difluoroalkylation**

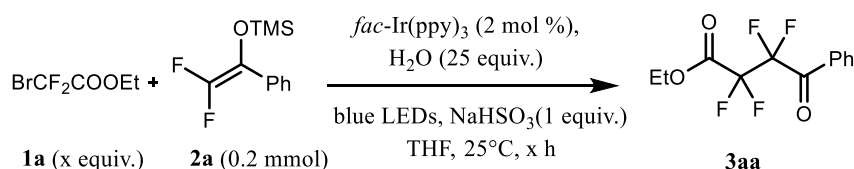

| entry | Time (x h) | 3aa (%) <sup>a</sup> |
|-------|------------|----------------------|
| 1     | 12         | 70                   |
| 2     | 18         | 85                   |
| 3     | 24         | 81                   |
| 4     | 36         | 83                   |

<sup>a</sup>Reaction conditions: **1a** (3 equiv.), **2a** (0.2 mmol), *fac*-Ir(ppy)<sub>3</sub> (2 mol %), NaHSO<sub>3</sub> (1 equiv.), H<sub>2</sub>O (25 equiv.) THF (2 mL), irradiation with visible light under an Ar atmosphere at room temperature, x h. Yields determined by <sup>19</sup>F NMR using Benzotrifluoride as an internal standard.

**Table S4. Screen of reaction time for perfluoroalkylation**

$\text{C}_4\text{F}_9\text{I}$  (1k, 3 equiv.) +  $\text{F}-\text{C}(\text{OTMS})=\text{C}(\text{F})-\text{Ph}$  (2a, 0.2 mmol)

$\xrightarrow[\text{CH}_2\text{Cl}_2, 25^\circ\text{C}, 18\text{ h}]{\text{fac-Ir(ppy)}_3 (2\text{ mol } \%), 3\text{ \AA sieves (10 mg), blue LEDs, additive (1 equiv.)}$

$\text{C}_3\text{F}_7-\text{C}(\text{F})_2-\text{C}(\text{F})_2-\text{C}(\text{O})-\text{Ph}$  (3ka)

| entry | Additive                        | 3ka (%) <sup>a</sup> |
|-------|---------------------------------|----------------------|
| 1     | CS <sub>2</sub> CO <sub>3</sub> | 75                   |
| 2     | Na <sub>2</sub> CO <sub>3</sub> | 44                   |
| 3     | NaHCO <sub>3</sub>              | 24                   |
| 4     | K <sub>3</sub> PO <sub>4</sub>  | 55                   |

<sup>a</sup>Reaction conditions: **1k** (3 equiv.), **2a** (0.2 mmol), *fac*-Ir(ppy)<sub>3</sub> (2 mol %), additive (1 equiv.), 3 Å sieve (10 mg), CH<sub>2</sub>Cl<sub>2</sub> (2 mL), irradiation with visible light under an Ar atmosphere at room temperature, 18 h. Yields determined by <sup>19</sup>F NMR using Benzotrifluoride as an internal standard.

## 8. Typical reaction set up

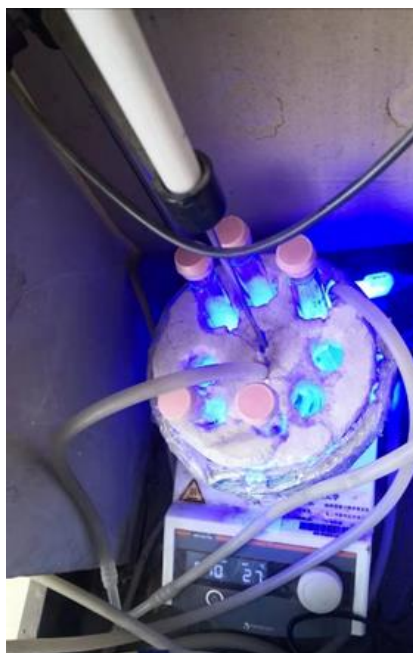

## 9. Mechanism studies

### 9.1 TEMPO Trapping Experiment

An over-dried Schlenk tube equipped with a magnetic stir bar was added with *fac*-Ir(ppy)<sub>3</sub> (0.004 mmol, 2 mol %), TEMPO (0.6 mmol, 3 equiv.) and NaHSO<sub>3</sub> (0.2 mmol, 1 equiv.). The tube was evacuated and backfilled with argon for three times. A solution of BrCF<sub>2</sub>COOEt (0.6 mmol, 3 equiv.), H<sub>2</sub>O (5 mmol, 25 equiv.) and difluoroenoxyisilane (0.2 mmol, 1 equiv.) in anhydrous THF (2 mL) was added via syringe. The reaction was stirred at room temperature for 18 h under the blue LEDs irradiation ( $\lambda = 450 \pm 15$  nm, 3 W electrical power, 3cm away). After the reaction, the residue was concentrated and purified by flash chromatography on silica gel to afford the corresponding trapping product **4** with 47% yield and **3aa** with trace yield.

## 9.2 1,1-diphenylethyene Trapping Experiment

An over-dried Schlenk tube equipped with a magnetic stir bar was added with *fac*-Ir(ppy)<sub>3</sub> (0.004 mmol, 2 mol %), 1,1-diphenylethyene (0.6 mmol, 3 equiv.) and NaHSO<sub>3</sub> (0.2 mmol, 1 equiv.). The tube was evacuated and backfilled with argon for three times. A solution of BrCF<sub>2</sub>COOEt (0.6 mmol, 3 equiv.), H<sub>2</sub>O (5 mmol, 25 equiv.) and difluoroenoxyisilane (0.2 mmol, 1 equiv.) in anhydrous THF (2 mL) was added via syringe. The reaction was stirred at room temperature for 18 h under the blue LEDs irradiation ( $\lambda = 450 \pm 15$  nm, 3 W electrical power, 3cm away). After the reaction, the residue was concentrated and filtered. The corresponding trapping product **5** was detected by GC-MS.

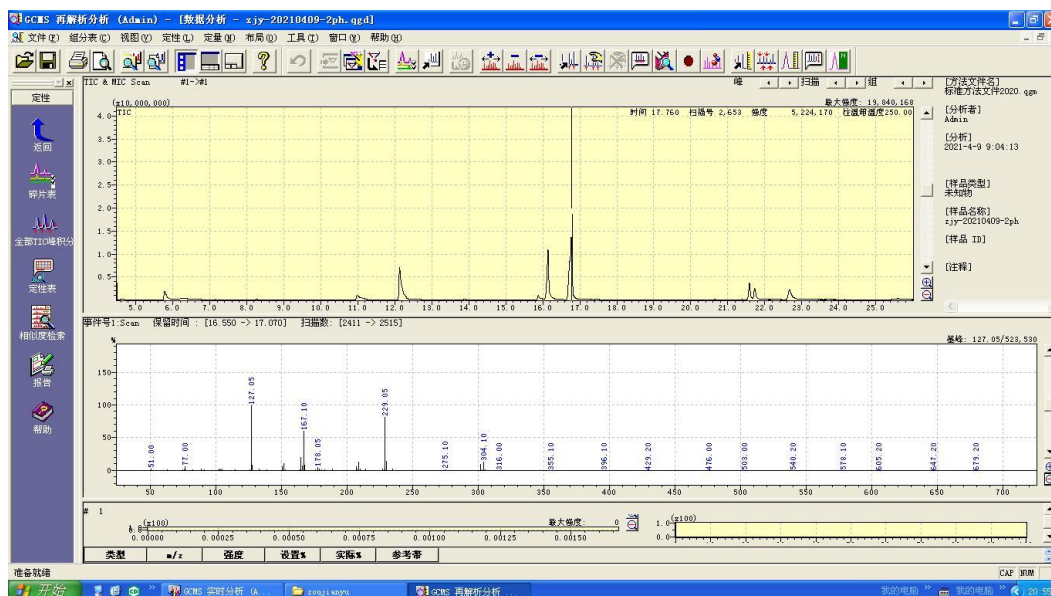

## 9.3 CV experiments for reagents and product 3aa

Cyclic voltammogram BrCF<sub>2</sub>COOEt, difluoroenoxyisilane and **3aa** in 0.1 M TBAP/MeCN at a glassy carbon working electrode with a Pt counter electrode and saturated calomel electrode (SCE). Potential sweep rate was 50 mV/s.

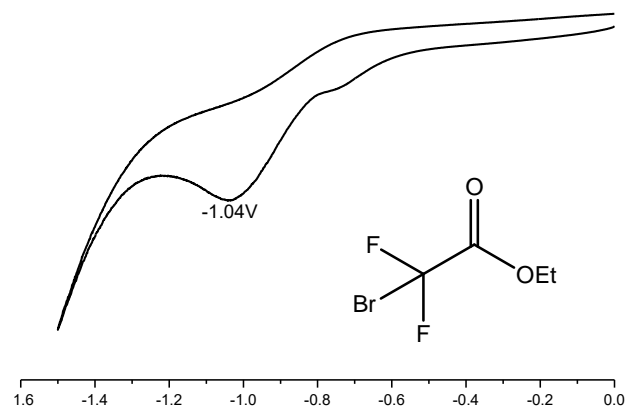

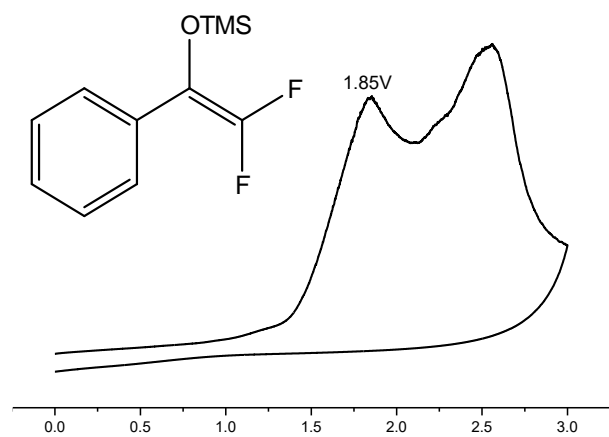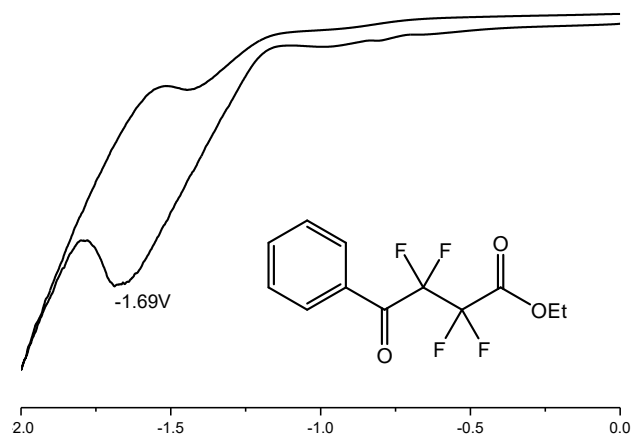

## 10. Compounds characterization

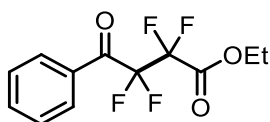

**Ethyl 2,2,3,3-tetrafluoro-4-oxo-4-phenylbutanoate (3aa)**<sup>3</sup>: colorless oil (45.6 mg, 82% yield). <sup>1</sup>H NMR (400 MHz, CDCl<sub>3</sub>) δ 8.10 (d, *J* = 6.4 Hz, 2H), 7.73 – 7.69 (m, 1H), 7.57 – 7.53 (m, 2H), 4.42 (q, *J* = 7.2 Hz, 2H), 1.37 (t, *J* = 7.2 Hz, 3H); <sup>13</sup>C NMR (101 MHz, CDCl<sub>3</sub>) δ 185.4 (t, *J* = 27.0 Hz), 159.8 (t, *J* = 29.0 Hz), 135.5, 130.9, 130.2 (t, *J* = 3.0 Hz), 129.0, 113.7 (t, *J* = 28.0 Hz), 111.3 – 110.4(m), 108.6 – 107.8 (m), 105.4 (t, *J* = 28.0 Hz), 63.9, 13.7; <sup>19</sup>F NMR (376 MHz, CDCl<sub>3</sub>) δ -113.13 (t, *J* = 4.4 Hz), -120.48 (t, *J* = 5.1 Hz); HRMS (ESI) *m/z*: [M + Na]<sup>+</sup> Calcd. for C<sub>12</sub>H<sub>10</sub>F<sub>4</sub>O<sub>3</sub>Na, 301.0458; Found, 301.0459.

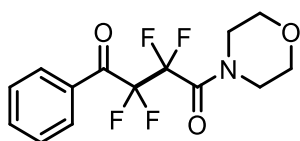

**2,2,3,3-tetrafluoro-1-morpholino-4-phenylbutane-1,4-dione (3ba)**: colorless oil (33.5 mg, 49% yield). <sup>1</sup>H NMR (600 MHz, CDCl<sub>3</sub>) δ 8.06 (d, *J* = 7.7 Hz, 2H), 7.66 – 7.63 (m, 1H), 7.52 – 7.50 (m, 2H), 3.77 (s, 4H), 3.75 – 3.73 (m, 2H), 3.63 – 3.62 (m, 2H); <sup>13</sup>C NMR (151 MHz, CDCl<sub>3</sub>) δ 186.1 (t, *J* = 26.8 Hz), 158.5 (t, *J* = 25.6 Hz), 134.4, 132.3, 129.9 (t, *J* = 3.3 Hz), 128.7, 113.7 (t, *J* = 26.7 Hz), 112.7 – 111.7 (m), 110.9 – 109.9 (m), 109.0 (t, *J* = 24.6 Hz), 66.5 (d, *J* = 13.7 Hz), 46.1 (t, *J* = 5.5 Hz), 43.2; <sup>19</sup>F NMR (376 MHz, CDCl<sub>3</sub>) δ -111.65 – -111.67 (m, 2F), -114.88 – -114.90 (m, 2F); HRMS (ESI) *m/z*: [M+Na]<sup>+</sup> Calcd. for C<sub>14</sub>H<sub>13</sub>F<sub>4</sub>NO<sub>3</sub>Na, 342.0724; Found, 342.0722.

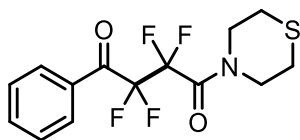

**2,2,3,3-tetrafluoro-1-phenyl-4-thiomorpholinobutane-1,4-dione (3ca)**: colorless oil (30.6 mg, 47% yield). <sup>1</sup>H NMR (400 MHz, CDCl<sub>3</sub>) δ 8.03 (d, *J* = 7.1 Hz, 2H), 7.62 (t, *J* = 7.5 Hz, 1H), 7.49 (t, *J* = 7.8 Hz, 2H), 4.01 – 3.95 (m, 2H), 3.87 – 3.81 (m, 2H), 2.76 – 2.71 (m, 2H), 2.68 – 2.62 (m, 2H); <sup>13</sup>C NMR (151 MHz, CDCl<sub>3</sub>) δ 186.2 (t, *J* = 26.7 Hz), 158.6 (t, *J* = 25.6 Hz), 134.3, 132.3, 129.9 (t, *J* = 4.4 Hz), 128.6, 113.8 (t, *J* = 26.4 Hz), 112.2 (dt, *J* = 67.6, 25.3 Hz), 110.5 (dt, *J* = 74.1, 25.6 Hz), 108.9 (t, *J* = 24.5 Hz), 48.3 (t, *J* = 5.4 Hz), 45.8, 28.0, 27.2; <sup>19</sup>F NMR (376 MHz, CDCl<sub>3</sub>) δ -111.64 – -111.67 (m, 2F), -114.84 – -114.86 (m, 2F); HRMS (ESI) *m/z*: [M + Na]<sup>+</sup> Calcd. for C<sub>14</sub>H<sub>13</sub>F<sub>4</sub>NO<sub>2</sub>SNa, 358.0495; Found, 358.0494.

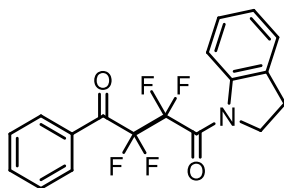

**2,2,3,3-tetrafluoro-1-(indolin-1-yl)-4-phenylbutane-1,4-dione (3da)**: white solid, m.p. = 62°C – 64°C (48.8 mg, 70% yield). <sup>1</sup>H NMR (400 MHz, CDCl<sub>3</sub>) δ 8.10 (d, *J* = 7.2 Hz, 3H), 7.67 – 7.63 (m, 1H), 7.53 – 7.50 (m, 2H), 7.25 – 7.09 (m, 3H), 4.40 (dd, *J* = 8.0, 8.8 Hz, 2H), 3.24

(dd,  $J = 8.4, 8.0$  Hz, 2H);  $^{13}\text{C}$  NMR (101 MHz,  $\text{CDCl}_3$ )  $\delta$  186.0 (t,  $J = 27.0$  Hz), 157.4 (t,  $J = 25.9$  Hz), 141.0, 134.5, 132.2, 131.6, 130.0 (t,  $J = 3.3$  Hz), 128.7, 127.6, 125.7, 124.7, 118.0, 114.5 – 113.5 (m), 111.8 – 110.8 (m), 109.1 – 108.1 (m), 47.3 (t,  $J = 6.9$  Hz), 28.5;  $^{19}\text{F}$  NMR (376 MHz,  $\text{CDCl}_3$ )  $\delta$  -114.24 – -114.26 (m, 2F), -115.05 – -115.07 (m, 2F); HRMS (ESI)  $m/z$ :  $[\text{M} + \text{Na}]^+$  Calcd. for  $\text{C}_{18}\text{H}_{13}\text{F}_4\text{NO}_2\text{Na}$ , 374.0775; Found, 374.0774.

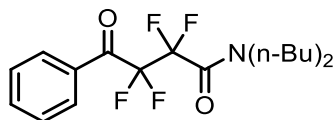

***N,N*-dibutyl-2,2,3,3-tetrafluoro-4-oxo-4-phenylbutanamide (3ea)**: pale yellow oil (38.7 mg, 53% yield).  $^1\text{H}$  NMR (400 MHz,  $\text{CDCl}_3$ )  $\delta$  8.05 (d,  $J = 8.0$  Hz, 2H), 7.64 – 7.60 (m, 1H), 7.51 – 7.47 (m, 2H), 3.47 (t,  $J = 8.4$  Hz, 2H), 3.31 (t,  $J = 7.6$  Hz, 2H), 1.69 – 1.62 (m, 2H), 1.57 – 1.49 (m, 2H), 1.41 – 1.24 (m, 4H), 0.97 (t,  $J = 7.6$  Hz, 3H), 0.91 (t,  $J = 7.6$  Hz, 3H);  $^{13}\text{C}$  NMR (151 MHz,  $\text{CDCl}_3$ )  $\delta$  186.3 (t,  $J = 27.0$  Hz), 159.6 (t,  $J = 25.3$  Hz), 134.1, 132.6, 129.9, 128.6, 114.0 (t,  $J = 25.6$  Hz), 112.8 – 111.8 (m), 110.6 (dt,  $J = 88.3, 25.3$  Hz), 109.2 (t,  $J = 24.8$  Hz), 47.0 (t,  $J = 5.2$  Hz), 46.6, 30.9, 28.9, 20.0, 19.9, 13.8, 13.7;  $^{19}\text{F}$  NMR (376 MHz,  $\text{CDCl}_3$ )  $\delta$  -111.58 – -111.61 (m, 2F), -114.80 – -114.83 (m, 2F); HRMS (ESI)  $m/z$ :  $[\text{M} + \text{Na}]^+$  Calcd. for  $\text{C}_{18}\text{H}_{24}\text{F}_4\text{NO}_2\text{Na}$ , 384.1557; Found, 384.1556.

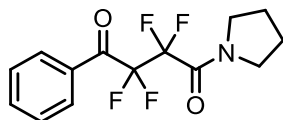

**2,2,3,3-tetrafluoro-1-phenyl-4-(pyrrolidin-1-yl) butane-1,4-dione (3fa)**: pale yellow oil (30.7 mg, 50% yield).  $^1\text{H}$  NMR (400 MHz,  $\text{CDCl}_3$ )  $\delta$  8.04 (d,  $J = 7.9$  Hz, 2H), 7.61 (t,  $J = 7.4$  Hz, 1H), 7.48 (t,  $J = 7.8$  Hz, 2H), 3.76 (t,  $J = 6.8$  Hz, 2H), 3.50 (t,  $J = 7.0$  Hz, 2H), 1.99 (p,  $J = 6.8$  Hz, 2H), 1.87 (t,  $J = 7.0$  Hz, 2H);  $^{13}\text{C}$  NMR (151 MHz,  $\text{CDCl}_3$ )  $\delta$  186.2 (t,  $J = 26.7$  Hz), 158.4 (t,  $J = 26.2$  Hz), 134.3, 132.4, 130.0 (t,  $J = 4.4$  Hz), 128.6, 113.2 – 112.6 (m), 111.4 – 110.9 (m), 109.6 – 109.1 (m), 47.4, 46.2 (t,  $J = 5.4$  Hz), 26.3, 23.2;  $^{19}\text{F}$  NMR (376 MHz,  $\text{CDCl}_3$ )  $\delta$  -114.86 – -114.89 (m, 2F), -115.42 – -115.45 (m, 2F); HRMS (ESI)  $m/z$ :  $[\text{M} + \text{Na}]^+$  Calcd. for  $\text{C}_{14}\text{H}_{13}\text{F}_4\text{NO}_2\text{Na}$ , 326.0775; Found, 326.0774.

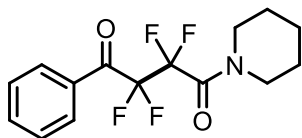

**2,2,3,3-tetrafluoro-1-phenyl-4-(piperidin-1-yl) butane-1,4-dione (3ga)**: pale yellow oil (49.4 mg, 78% yield).  $^1\text{H}$  NMR (400 MHz,  $\text{CDCl}_3$ )  $\delta$  8.05 (d,  $J = 7.9$  Hz, 2H), 7.63 (t,  $J = 7.5$  Hz, 1H), 7.50 (t,  $J = 7.6$  Hz, 2H), 3.67 (s, 2H), 3.55 – 3.51 (m, 2H), 1.69 (p,  $J = 3.1$  Hz, 4H), 1.63 – 1.58 (m, 2H);  $^{13}\text{C}$  NMR (151 MHz,  $\text{CDCl}_3$ )  $\delta$  186.5 (t,  $J = 27.0$  Hz), 158.2 (t,  $J = 25.3$  Hz), 134.0, 132.7, 129.9 (t,  $J = 4.4$  Hz), 128.6, 114.1 (t,  $J = 26.2$  Hz), 112.7 – 112.2 (m), 111.0 – 110.3 (m), 109.0 (t,  $J = 24.5$  Hz), 46.4 (t,  $J = 5.7$  Hz), 44.3, 26.3, 25.4, 24.2;  $^{19}\text{F}$  NMR (376 MHz,  $\text{CDCl}_3$ )  $\delta$  -111.41 – -111.43 (m, 2F), -115.30 – -115.32 (m, 2F); HRMS (ESI)  $m/z$ :  $[\text{M} + \text{Na}]^+$  Calcd. for  $\text{C}_{15}\text{H}_{15}\text{F}_4\text{NO}_2\text{Na}$ , 340.0931; Found, 340.0930.

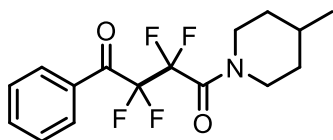

**2,2,3,3-tetrafluoro-1-(4-methylpiperidin-1-yl)-4-phenylbutane-1,4-dione (3ha):** colorless oil (52.3 mg, 79% yield).  $^1\text{H}$  NMR (400 MHz,  $\text{CDCl}_3$ )  $\delta$  8.05 (d,  $J = 8.0$  Hz, 2H), 4.39 – 4.34 (m, 1H), 4.24 – 4.20 (m, 1H), 3.16 – 3.08 (m, 1H), 2.73 – 2.66 (m, 1H), 1.80 – 1.63 (m, 3H), 1.31 – 1.12 (m, 2H), 0.97 (d,  $J = 6.4$  Hz, 3H);  $^{13}\text{C}$  NMR (101 MHz,  $\text{CDCl}_3$ )  $\delta$  186.4 (t,  $J = 26.9$  Hz), 158.2 (t,  $J = 25.5$  Hz), 134.0, 132.7, 129.8 (t,  $J = 3.3$  Hz), 128.5, 115.0 (t,  $J = 26.6$  Hz), 113.4 (t,  $J = 24.3$  Hz), 112.3 (t,  $J = 26.5$  Hz), 110.8 (t,  $J = 24.2$  Hz), 109.6 (t,  $J = 26.6$  Hz), 108.1 (t,  $J = 24.2$  Hz), 45.6 (t,  $J = 5.9$  Hz), 43.6, 34.4, 33.4, 30.8, 21.4;  $^{19}\text{F}$  NMR (376 MHz,  $\text{CDCl}_3$ )  $\delta$  -111.34 – -111.37 (m, 2F), -115.25 – -115.28 (m, 2F); HRMS (ESI)  $m/z$ :  $[\text{M} + \text{Na}]^+$  Calcd. for  $\text{C}_{16}\text{H}_{17}\text{F}_4\text{NO}_2\text{Na}$ , 354.1088; Found, 354.1086.

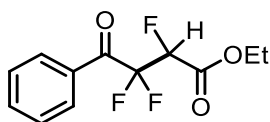

**Ethyl 2,3,3-trifluoro-4-oxo-4-phenylbutanoate (3ia):** colorless oil (36.2 mg, 70% yield).  $^1\text{H}$  NMR (400 MHz,  $\text{CDCl}_3$ )  $\delta$  8.08 (d,  $J = 7.2$  Hz, 2H), 7.68 (t,  $J = 7.5$  Hz, 1H), 7.53 (dd,  $J = 8.7$ , 7.1 Hz, 2H), 5.53 (t,  $J = 10.6$  Hz, 1H), 4.33 (qd,  $J = 7.2$ , 1.8 Hz, 2H), 1.30 (t,  $J = 7.2$  Hz, 3H);  $^{13}\text{C}$  NMR (101 MHz,  $\text{CDCl}_3$ )  $\delta$  186.9 (t,  $J = 28.1$  Hz), 163.8 – 163.4 (m), 134.9, 130.0 (t,  $J = 3.7$  Hz), 128.8, 116.8 – 111.1 (m), 86.7 – 83.9 (m), 62.7, 13.8;  $^{19}\text{F}$  NMR (376 MHz,  $\text{CDCl}_3$ )  $\delta$  -107.95 – -110.78 (m), -206.55 (t,  $J = 12.3$  Hz); HRMS (ESI)  $m/z$ :  $[\text{M} + \text{Na}]^+$  Calcd. for  $\text{C}_{12}\text{H}_{11}\text{F}_3\text{O}_3\text{Na}$ , 283.0553; Found, 283.0551.

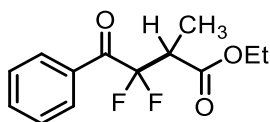

**Ethyl 3,3-difluoro-2-methyl-4-oxo-4-phenylbutanoate (3ja):** colorless oil (33.3 mg, 65% yield).  $^1\text{H}$  NMR (400 MHz,  $\text{CDCl}_3$ )  $\delta$  8.08 (d,  $J = 7.2$  Hz, 2H), 7.63 (t,  $J = 7.4$  Hz, 1H), 7.50 (dd,  $J = 8.4$ , 7.1 Hz, 2H), 4.14 (q,  $J = 7.2$  Hz, 2H), 3.62 – 3.49 (m, 1H), 1.46 (d,  $J = 7.3$  Hz, 3H), 1.20 (t,  $J = 7.1$  Hz, 3H);  $^{13}\text{C}$  NMR (101 MHz,  $\text{CDCl}_3$ )  $\delta$  189.6 – 188.8 (m), 170.1 (d,  $J = 11.0$  Hz), 134.1, 132.3, 130.3 – 129.7 (m), 128.6, 117.8 (dd,  $J = 262.8$ , 253.6 Hz), 61.3, 44.2 – 43.5 (m), 13.9, 9.8 (t,  $J = 4.8$  Hz);  $^{19}\text{F}$  NMR (376 MHz,  $\text{CDCl}_3$ )  $\delta$  -100.80 – -110.09 (m, 2F); HRMS (ESI)  $m/z$ :  $[\text{M} + \text{Na}]^+$  Calcd. for  $\text{C}_{13}\text{H}_{14}\text{F}_2\text{O}_3\text{Na}$ , 279.0803; Found, 279.0801.

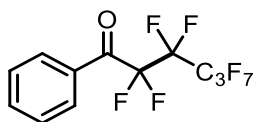

**2,2,3,3,4,4,5,5,6,6,6-undecafluoro-1-phenylhexan-1-one (3ka):** colorless oil (51.7 mg, 69% yield).  $^1\text{H}$  NMR (400 MHz,  $\text{CDCl}_3$ )  $\delta$  8.08 (d,  $J = 7.6$  Hz, 2H), 7.72 (t,  $J = 7.5$  Hz, 1H), 7.55 (t,  $J = 7.9$  Hz, 2H);  $^{13}\text{C}$  NMR (101 MHz,  $\text{CDCl}_3$ )  $\delta$  183.3 (t,  $J = 25.9$  Hz), 135.4, 131.6, 130.2 (t,  $J = 4.0$  Hz), 129.0, 121.5 – 105.6 (m);  $^{19}\text{F}$  NMR (376 MHz,  $\text{CDCl}_3$ )  $\delta$  -80.89 (t,  $J = 12.3$  Hz, 3F), -112.83 (t,  $J = 14.3$  Hz, 2F), -121.12 – -121.26 (m, 2F), -121.86 – -122.06 (m, 2F), -126.26

– -126.37 (m, 2F); HRMS (ESI)  $m/z$ :  $[M + K]^+$  Calcd. for  $C_{12}H_5F_{11}OK$ , 412.9796; Found, 412.9796.

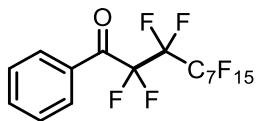

**2,2,3,3,4,4,5,5,6,6,7,7,8,8,9,9,10,10,10-nonadecafluoro-1-phenyldecan-1-one (3la):** colorless oil (85.1 mg, 74% yield).  $^1H$  NMR (400 MHz,  $CDCl_3$ )  $\delta$  8.10 – 8.05 (m, 2H), 7.70 (t,  $J = 7.5$  Hz, 1H), 7.57 – 7.50 (m, 2H);  $^{13}C$  NMR (101 MHz,  $CDCl_3$ )  $\delta$  183.3 (t,  $J = 26.0$  Hz), 135.3, 131.7, 130.2 (t,  $J = 3.9$  Hz), 129.0, 121.5 (t,  $J = 33.2$  Hz), 118.6 (t,  $J = 33.0$  Hz), 115.7 (t,  $J = 33.0$  Hz), 114.2 – 112.5 (m), 111.7 – 110.3 (m), 109.0 – 107.2 (m), 106.3 – 105.2 (m);  $^{19}F$  NMR (376 MHz,  $CDCl_3$ )  $\delta$  -81.24 – -81.33 (m, 3F), -112.91 – -113.00 (m, 2F), -121.06 – -123.07 (m, 12F), -123.01 – -123.07 (m, 2F); HRMS (ESI)  $m/z$ :  $[M + H]^+$  Calcd. for  $C_{16}H_6F_{19}O$ , 575.0110; Found, 575.0111.

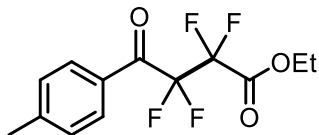

**Ethyl 2,2,3,3-tetrafluoro-4-oxo-4-(p-tolyl) butanoate (3ab):** colorless oil (40.9 mg, 70% yield).  $^1H$  NMR (400 MHz,  $CDCl_3$ )  $\delta$  7.99 (d,  $J = 7.8$  Hz, 2H), 7.33 (d,  $J = 8.3$  Hz, 2H), 4.40 (q,  $J = 7.1$  Hz, 2H), 2.44 (s, 3H), 1.36 (t,  $J = 7.2$  Hz, 3H);  $^{13}C$  NMR (101 MHz,  $CDCl_3$ )  $\delta$  185.0 (t,  $J = 27.3$  Hz), 159.8 (t,  $J = 29.5$  Hz), 147.0, 130.3 (t,  $J = 3.5$  Hz), 129.7, 129.5, 128.5, 113.9 (t,  $J = 28.6$  Hz), 111.5 – 110.5 (m), 108.8 – 107.9 (m), 105.5 (t,  $J = 28.1$  Hz), 63.8, 21.9, 13.7;  $^{19}F$  NMR (376 MHz,  $CDCl_3$ )  $\delta$  -112.99 (t,  $J = 4.8$  Hz, 2F), -120.62 (t,  $J = 4.8$  Hz, 2F); HRMS (ESI)  $m/z$ :  $[M + Na]^+$  Calcd. for  $C_{13}H_{12}F_4O_3Na$ , 315.0615; Found, 315.0614.

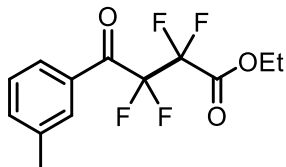

**Ethyl 2,2,3,3-tetrafluoro-4-oxo-4-(m-tolyl) butanoate (3ac):** colorless oil (43.8 mg, 75% yield).  $^1H$  NMR (400 MHz,  $CDCl_3$ )  $\delta$  7.92 – 7.89 (m, 2H), 7.52 (d,  $J = 7.7$  Hz, 1H), 7.43 (t,  $J = 7.6$  Hz, 1H), 4.41 (q,  $J = 7.1$  Hz, 2H), 2.44 (s, 3H), 1.37 (t,  $J = 7.2$  Hz, 3H);  $^{13}C$  NMR (101 MHz,  $CDCl_3$ )  $\delta$  185.6 (t,  $J = 27.7$  Hz), 159.8 (t,  $J = 29.5$  Hz), 139.0, 136.3, 131.0, 130.5, 128.8, 127.5 (t,  $J = 3.9$  Hz), 113.8, 111.4 – 110.7 (m), 108.4 – 107.8 (m), 105.5, 63.8, 21.3, 13.7;  $^{19}F$  NMR (376 MHz,  $CDCl_3$ )  $\delta$  -112.98 (t,  $J = 6.5$  Hz, 2F), -120.53 (t,  $J = 6.5$  Hz, 2F); HRMS (ESI)  $m/z$ :  $[M + Na]^+$  Calcd. for  $C_{13}H_{12}F_4O_3Na$ , 315.0615; Found, 315.0614.

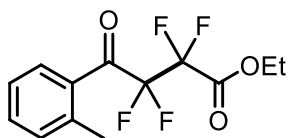

**Ethyl 2,2,3,3-tetrafluoro-4-oxo-4-(o-tolyl) butanoate (3ad):** colorless oil (45.4 mg, 78% yield).  $^1H$  NMR (400 MHz,  $CDCl_3$ )  $\delta$  7.93 – 7.91 (m, 1H), 7.51 (t,  $J = 7.6$  Hz, 1H), 7.34 (t,  $J = 7.0$  Hz, 2H), 4.42 (q,  $J = 7.1$  Hz, 2H), 2.49 (s, 3H), 1.38 (t,  $J = 7.1$  Hz, 3H);  $^{13}C$  NMR (101

MHz, CDCl<sub>3</sub>)  $\delta$  188.2 (t,  $J$  = 26.6 Hz), 159.9 (t,  $J$  = 29.7 Hz), 141.4, 133.7, 132.4, 130.7, 130.1 (t,  $J$  = 5.9 Hz), 125.8, 113.3 (t,  $J$  = 28.1 Hz), 111.3 – 110.4 (m), 108.6 – 107.7 (m), 105.7 (t,  $J$  = 28.3 Hz), 63.8, 21.3, 13.8; <sup>19</sup>F NMR (376 MHz, CDCl<sub>3</sub>)  $\delta$  -112.9 (t,  $J$  = 5.1 Hz, 2F), -120.2 (t,  $J$  = 5.1 Hz, 2F); HRMS (ESI)  $m/z$ : [M + Na]<sup>+</sup> Calcd. for C<sub>13</sub>H<sub>13</sub>F<sub>4</sub>O<sub>3</sub>Na, 315.0615; Found, 315.0614.

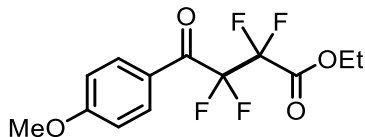

**Ethyl 2,2,3,3-tetrafluoro-4-(4-methoxyphenyl)-4-oxobutanoate (3ae):** colorless oil (27.5 mg, 45% yield). <sup>1</sup>H NMR (400 MHz, CDCl<sub>3</sub>)  $\delta$  8.09 (d,  $J$  = 8.7 Hz, 2H), 7.01 – 6.98 (m, 2H), 4.41 (q,  $J$  = 7.2 Hz, 2H), 3.91 (s, 3H), 1.36 (t,  $J$  = 7.2 Hz, 3H); <sup>13</sup>C NMR (101 MHz, CDCl<sub>3</sub>)  $\delta$  183.7 (t,  $J$  = 27.0 Hz), 165.4, 159.9 (t,  $J$  = 29.7 Hz), 132.8 (t,  $J$  = 3.9 Hz), 123.8, 114.3 – 113.8 (m), 111.6 – 110.5 (m), 108.7 – 107.9 (m), 105.5 (t,  $J$  = 27.2 Hz), 63.7, 55.7, 13.7; <sup>19</sup>F NMR (376 MHz, CDCl<sub>3</sub>)  $\delta$  -112.59 (t,  $J$  = 6.5 Hz, 2F), -120.78 (t,  $J$  = 6.8 Hz, 2F); HRMS (ESI)  $m/z$ : [M + Na]<sup>+</sup> Calcd. for C<sub>13</sub>H<sub>12</sub>F<sub>4</sub>O<sub>4</sub>Na, 331.0564; Found, 331.0563.

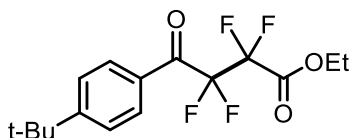

**Ethyl 4-(4-(tert-butyl)phenyl)-2,2,3,3-tetrafluoro-4-oxobutanoate (3af):** colorless oil (53.5 mg, 80% yield). <sup>1</sup>H NMR (400 MHz, CDCl<sub>3</sub>)  $\delta$  8.05 (d,  $J$  = 8.6 Hz, 2H), 7.55 (d,  $J$  = 8.6 Hz, 2H), 4.41 (q,  $J$  = 7.1 Hz, 2H), 1.38 – 1.34 (m, 12H); <sup>13</sup>C NMR (101 MHz, CDCl<sub>3</sub>)  $\delta$  185.0 (t,  $J$  = 27.1 Hz), 160.1 – 159.5 (m), 130.2 (t,  $J$  = 3.5 Hz), 128.4 (d,  $J$  = 3.3 Hz), 126.0, 113.9 (t,  $J$  = 28.4 Hz), 111.5 – 110.8 (m), 108.5 – 107.9 (m), 105.5 (t,  $J$  = 28.1 Hz), 63.8, 35.4, 30.9, 13.7; <sup>19</sup>F NMR (376 MHz, CDCl<sub>3</sub>)  $\delta$  -112.99 (t,  $J$  = 5.8 Hz, 2F), -120.60 (t,  $J$  = 6.1 Hz, 2F); HRMS (ESI)  $m/z$ : [M + Na]<sup>+</sup> Calcd. for C<sub>16</sub>H<sub>18</sub>F<sub>4</sub>O<sub>3</sub>Na, 357.1084; Found, 357.1083.

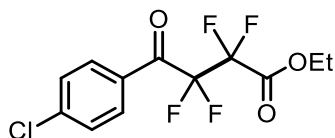

**Ethyl 4-(4-chlorophenyl)-2,2,3,3-tetrafluoro-4-oxobutanoate (3ag):** colorless oil (43.1 mg, 69% yield). <sup>1</sup>H NMR (400 MHz, CDCl<sub>3</sub>)  $\delta$  8.04 (d,  $J$  = 8.3 Hz, 2H), 7.54 – 7.50 (m, 2H), 4.42 (q,  $J$  = 7.2 Hz, 2H), 1.37 (t,  $J$  = 7.2 Hz, 3H); <sup>13</sup>C NMR (101 MHz, CDCl<sub>3</sub>)  $\delta$  184.3 (t,  $J$  = 27.7 Hz), 159.6 (t,  $J$  = 29.5 Hz), 142.4, 131.5 (t,  $J$  = 3.7 Hz), 129.4, 129.4 – 129.3 (m), 131.5 (t,  $J$  = 3.7 Hz), 111.3 – 110.4 (m), 108.6 – 107.8 (m), 105.4 (t,  $J$  = 28.1 Hz), 63.9, 13.7; <sup>19</sup>F NMR (376 MHz, CDCl<sub>3</sub>)  $\delta$  -113.37 (t,  $J$  = 6.1 Hz, 2F), -120.31 (t,  $J$  = 6.1 Hz, 2F); HRMS (ESI)  $m/z$ : [M + Na]<sup>+</sup> Calcd. for C<sub>12</sub>H<sub>9</sub>ClF<sub>4</sub>O<sub>3</sub>Na, 335.0069; Found, 335.0068.

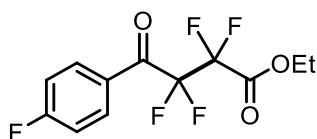

**Ethyl 2,2,3,3-tetrafluoro-4-(4-fluorophenyl)-4-oxobutanoate (3ah):** pale yellow oil (47.4 mg, 80% yield). <sup>1</sup>H NMR (400 MHz, CDCl<sub>3</sub>)  $\delta$  8.17 – 8.14 (m, 2H), 7.25 – 7.19 (m, 2H), 4.42

(q,  $J = 7.1$  Hz, 2H), 1.37 (t,  $J = 7.2$  Hz, 3H);  $^{13}\text{C}$  NMR (101 MHz,  $\text{CDCl}_3$ )  $\delta$  183.9 (t,  $J = 27.5$  Hz), 168.4, 165.8, 159.7 (t,  $J = 29.3$  Hz), 133.2 (dt,  $J = 9.9, 3.3$  Hz), 127.4 (d,  $J = 3.7$  Hz), 116.5, 116.3, 113.7 (t, 28.0 Hz), 111.3 – 110.4 (m), 108.7 – 107.8 (m), 105.4 (t,  $J = 27.8$  Hz), 63.9, 13.7;  $^{19}\text{F}$  NMR (376 MHz,  $\text{CDCl}_3$ )  $\delta$  -99.81 (s, 1F), -113.16 (t,  $J = 6.8$  Hz, 2F), -120.44 (t,  $J = 6.5$  Hz, 2F); HRMS (ESI)  $m/z$ :  $[\text{M} + \text{Na}]^+$  Calcd. for  $\text{C}_{12}\text{H}_9\text{F}_5\text{O}_3\text{Na}$ , 319.0364; Found, 319.0362.

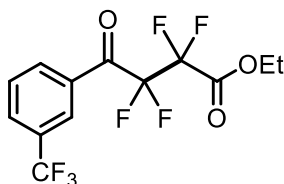

**Ethyl 2,2,3,3-tetrafluoro-4-oxo-4-(3-(trifluoromethyl) phenyl) butanoate (3ai):** colorless oil (44.1 mg, 64% yield).  $^1\text{H}$  NMR (400 MHz,  $\text{CDCl}_3$ )  $\delta$  8.34 (s, 1H), 8.29 (d,  $J = 8.1$  Hz, 1H), 7.97 (d,  $J = 7.9$  Hz, 1H), 7.72 (t,  $J = 7.9$  Hz, 1H), 4.43 (q,  $J = 7.2$  Hz, 2H), 1.38 (t,  $J = 7.2$  Hz, 3H);  $^{13}\text{C}$  NMR (101 MHz,  $\text{CDCl}_3$ )  $\delta$  184.4 (t,  $J = 27.9$  Hz), 159.6 (t,  $J = 29.3$  Hz), 133.2 (d,  $J = 4.4$  Hz), 132.4 – 131.4 (m), 129.8, 127.3 – 119.2 (m), 113.6 (t,  $J = 28.9$  Hz), 111.2 – 110.4 (m), 108.5 – 107.7 (m), 105.4 (t,  $J = 28.3$  Hz), 64.1, 13.7;  $^{19}\text{F}$  NMR (376 MHz,  $\text{CDCl}_3$ )  $\delta$  -63.28 (s, 3F), -113.77 (t,  $J = 5.6$  Hz, 2F), -120.16 (t,  $J = 5.3$  Hz, 2F); HRMS (ESI)  $m/z$ :  $[\text{M} + \text{Na}]^+$  Calcd. for  $\text{C}_{13}\text{H}_9\text{F}_7\text{O}_3\text{Na}$ , 369.0332; Found, 369.0332.

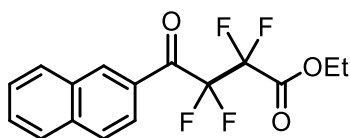

**Ethyl 2,2,3,3-tetrafluoro-4-(naphthalen-2-yl)-4-oxobutanoate (3aj):** colorless oil (39.0 mg, 59% yield).  $^1\text{H}$  NMR (400 MHz,  $\text{CDCl}_3$ )  $\delta$  8.70 (s, 1H), 8.07 – 8.01 (m, 2H), 7.96 – 7.90 (m, 2H), 7.71 – 7.67 (m, 1H), 7.63 – 7.59 (m, 1H), 4.43 (q,  $J = 7.2$  Hz, 2H), 1.38 (t,  $J = 7.2$  Hz, 3H);  $^{13}\text{C}$  NMR (101 MHz,  $\text{CDCl}_3$ )  $\delta$  184.9 (t,  $J = 27.3$  Hz), 159.8 (t,  $J = 29.5$  Hz), 148.1, 139.1, 130.8 (t,  $J = 3.5$  Hz), 129.6, 129.1, 128.8, 127.5, 127.3, 113.9, 111.0 (dt,  $J = 40.0, 28.5$  Hz), 108.5 – 107.9 (m), 105.5, 63.8, 13.7;  $^{19}\text{F}$  NMR (376 MHz,  $\text{CDCl}_3$ )  $\delta$  -112.38 (t,  $J = 6.5$  Hz, 2F), -120.39 (t,  $J = 6.5$  Hz, 2F); HRMS (ESI)  $m/z$ :  $[\text{M} + \text{H}]^+$  Calcd. for  $\text{C}_{16}\text{H}_{13}\text{F}_4\text{O}_3$ , 329.0795; Found, 329.0794.

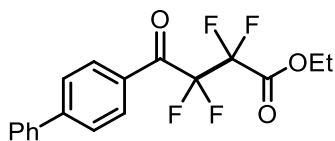

**Ethyl 4-([1,1'-biphenyl]-4-yl)-2,2,3,3-tetrafluoro-4-oxobutanoate (3ak):** colorless oil (48.6 mg, 69% yield).  $^1\text{H}$  NMR (400 MHz,  $\text{CDCl}_3$ )  $\delta$  8.17 (d,  $J = 8.3$  Hz, 2H), 7.74 (d,  $J = 8.6$  Hz, 2H), 7.63 (d,  $J = 7.6$  Hz, 2H), 7.50 – 7.41 (m, 3H), 4.42 (q,  $J = 7.1$  Hz, 2H), 1.37 (t,  $J = 7.2$  Hz, 3H);  $^{13}\text{C}$  NMR (101 MHz,  $\text{CDCl}_3$ )  $\delta$  184.9 (t,  $J = 27.3$  Hz), 159.8 (t,  $J = 29.5$  Hz), 148.1, 139.1, 130.8 (t,  $J = 3.5$  Hz), 129.6 (d,  $J = 3.3$  Hz), 129.1, 128.8, 127.5, 127.3, 113.9, 111.5 – 110.5 (m), 108.7 – 107.2 (m), 105.5, 63.8, 13.7;  $^{19}\text{F}$  NMR (376 MHz,  $\text{CDCl}_3$ )  $\delta$  -112.99 (t,  $J = 5.2$  Hz, 2F), -120.39 (t,  $J = 5.3$  Hz, 2F); HRMS (ESI)  $m/z$ :  $[\text{M} + \text{Na}]^+$  Calcd. for  $\text{C}_{18}\text{H}_{14}\text{F}_4\text{O}_3\text{Na}$ , 377.0771; Found, 377.0771

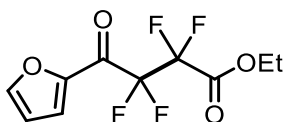

**Ethyl 2,2,3,3-tetrafluoro-4-(furan-2-yl)-4-oxobutanoate (3al):** colorless oil (9.3 mg, 17% yield).  $^1\text{H}$  NMR (400 MHz,  $\text{CDCl}_3$ )  $\delta$  7.82 (dd,  $J = 1.7, 0.7$  Hz, 1H), 7.59 – 7.54 (m, 1H), 6.68 (dd,  $J = 3.8, 1.7$  Hz, 1H), 4.41 (q,  $J = 7.2$  Hz, 2H), 1.37 (t,  $J = 7.2$  Hz, 3H);  $^{13}\text{C}$  NMR (151 MHz,  $\text{CDCl}_3$ )  $\delta$  172.5 (t,  $J = 27.8$  Hz), 159.4 (t,  $J = 29.4$  Hz), 150.1, 147.8, 124.7, 113.2, 112.1 (t,  $J = 30.0$  Hz), 110.1 (dt,  $J = 69.8, 29.4$  Hz), 108.4 (dt,  $J = 66.3, 30.5$  Hz), 106.4 (t,  $J = 30.0$  Hz), 64.1, 13.7;  $^{19}\text{F}$  NMR (376 MHz,  $\text{CDCl}_3$ )  $\delta$  -116.99 (t,  $J = 5.8$  Hz, 2F), -120.05 (t,  $J = 5.8$  Hz, 2F); HRMS (ESI)  $m/z$ :  $[\text{M} + \text{Na}]^+$  Calcd. for  $\text{C}_{10}\text{H}_8\text{F}_4\text{O}_4\text{Na}$ , 291.0251; Found, 291.0249.

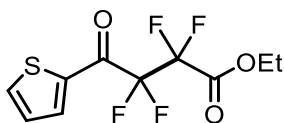

**Ethyl 2,2,3,3-tetrafluoro-4-oxo-4-(thiophen-2-yl) butanoate (3am):** pale yellow oil (17.5 mg, 31% yield).  $^1\text{H}$  NMR (400 MHz,  $\text{CDCl}_3$ )  $\delta$  8.07 – 8.05 (m, 1H), 7.90 (d,  $J = 4.9$  Hz, 1H), 7.27 – 7.24 (m, 1H), 4.41 (q,  $J = 7.1$  Hz, 2H), 1.37 (t,  $J = 7.2$  Hz, 3H);  $^{13}\text{C}$  NMR (101 MHz,  $\text{CDCl}_3$ )  $\delta$  177.97 (t,  $J = 27.9$  Hz), 159.50 (t,  $J = 29.5$  Hz), 138.03, 137.48, 136.81 (t,  $J = 5.1$  Hz), 129.18, 113.30, 110.70 (td,  $J = 29.8, 14.9$  Hz), 108.05 (td,  $J = 30.0, 29.5, 19.6$  Hz), 105.52 (t,  $J = 29.5$  Hz), 64.03, 13.73;  $^{19}\text{F}$  NMR (376 MHz,  $\text{CDCl}_3$ )  $\delta$  -114.78 (t,  $J = 5.8$  Hz, 2F), -120.11 (t,  $J = 6.1$  Hz, 2F); HRMS (ESI)  $m/z$ :  $[\text{M} + \text{Na}]^+$  Calcd. for  $\text{C}_{10}\text{H}_8\text{F}_4\text{O}_3\text{SNa}$ , 307.0022; Found, 307.0020.

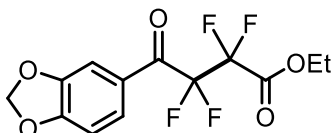

**Ethyl 4-(benzo[d][1,3]dioxol-5-yl)-2,2,3,3-tetrafluoro-4-oxobutanoate (3an):** colorless oil (33.4 mg, 52% yield).  $^1\text{H}$  NMR (400 MHz,  $\text{CDCl}_3$ )  $\delta$  7.78 (dd,  $J = 8.4, 1.7$  Hz, 1H), 7.50 (s, 1H), 6.92 (d,  $J = 8.3$  Hz, 1H), 6.10 (s, 2H), 4.41 (q,  $J = 7.1$  Hz, 2H), 1.36 (t,  $J = 7.2$  Hz, 3H);  $^{13}\text{C}$  NMR (101 MHz,  $\text{CDCl}_3$ )  $\delta$  183.3 (t,  $J = 27.3$  Hz), 159.8 (t,  $J = 29.7$  Hz), 154.0, 148.5, 127.9 (t,  $J = 4.4$  Hz), 125.3, 113.9 (t,  $J = 28.1$  Hz), 111.5 – 110.4 (m), 109.3, 108.5 – 107.8 (m), 105.5 (t,  $J = 27.8$  Hz), 102.4, 63.7, 13.7;  $^{19}\text{F}$  NMR (376 MHz,  $\text{CDCl}_3$ )  $\delta$  -112.26 (t,  $J = 6.5$  Hz, 2F), -120.69 (t,  $J = 6.8$  Hz, 2F); HRMS (ESI)  $m/z$ :  $[\text{M} + \text{Na}]^+$  Calcd. for  $\text{C}_{13}\text{H}_{10}\text{F}_4\text{O}_5\text{Na}$ , 345.0357; Found, 345.0355.

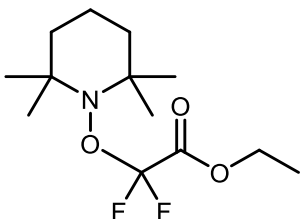

**Ethyl 2,2-difluoro-2-((2,2,6,6-tetramethylpiperidin-1-yl) oxy) acetate (4)<sup>6</sup>:** colorless oil (35.6 mg, 47% yield).  $^1\text{H}$  NMR (400 MHz,  $\text{CDCl}_3$ )  $\delta$  4.35 (q,  $J = 7.1$  Hz, 2H), 1.60 – 1.55 (m, 5H), 1.37 (t,  $J = 7.2$  Hz, 4H), 1.20 – 1.17 (m, 12H);  $^{13}\text{C}$  NMR (101 MHz,  $\text{CDCl}_3$ )  $\delta$  159.7 (t,  $J$

= 42.6 Hz), 114.5 (t,  $J$  = 271.5 Hz), 62.0, 60.4, 39.2, 32.4, 29.9, 19.7, 15.9, 12.9;  $^{19}\text{F}$  NMR (376 MHz,  $\text{CDCl}_3$ )  $\delta$  -73.5(s, 2F); HRMS (ESI)  $m/z$ :  $[\text{M} + \text{H}]^+$  Calcd. for  $\text{C}_{13}\text{H}_{24}\text{F}_2\text{NO}_3$ , 280.1719; Found, 280.1718.

## 11. Reference

1. C. P. Chen, R. S. Zeng, J. Y. Zhang, Y. S. Zhao. *Eur. J. Org. Chem.* 2017, **2017**, 6947-6950.
2. Y. b. Wu, G. p. Lu, B. j. Zhou, M. j. Bu, L. Wan, C. Cai. *Chem. Commun.* 2016, **52**, 5965-5968.
3. T. Fukuhara, S. Hara, *J. Org. Chem.* , 2010, **75**, 7393-7399;
4. J. H. Simons, W. T. Black, R. F. Clark, *J. Am. Chem. Soc.* , 1953, **75**, 5621-5622.
5. C. L. Bumgardner, J. P. Burgess, *Tetrahedron Lett.* , 1992, **33**, 1683-1686.
6. Z. Zhang, X. Li, D. Shi, *Adv. Synth. Catal.* , 2021, **363**, 3348-3353.

12.  $^1\text{H}$  NMR,  $^{13}\text{C}$  NMR and  $^{19}\text{F}$  NMR spectra of all new products<sup>a</sup>

<sup>a</sup>  $^1\text{H}$  NMR was conducted in 400MHz,  $^{19}\text{F}$  NMR was conducted in 376 MHz and  $^{13}\text{C}$  NMR was conducted in 101MHz unless noted.

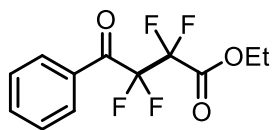

**3aa**

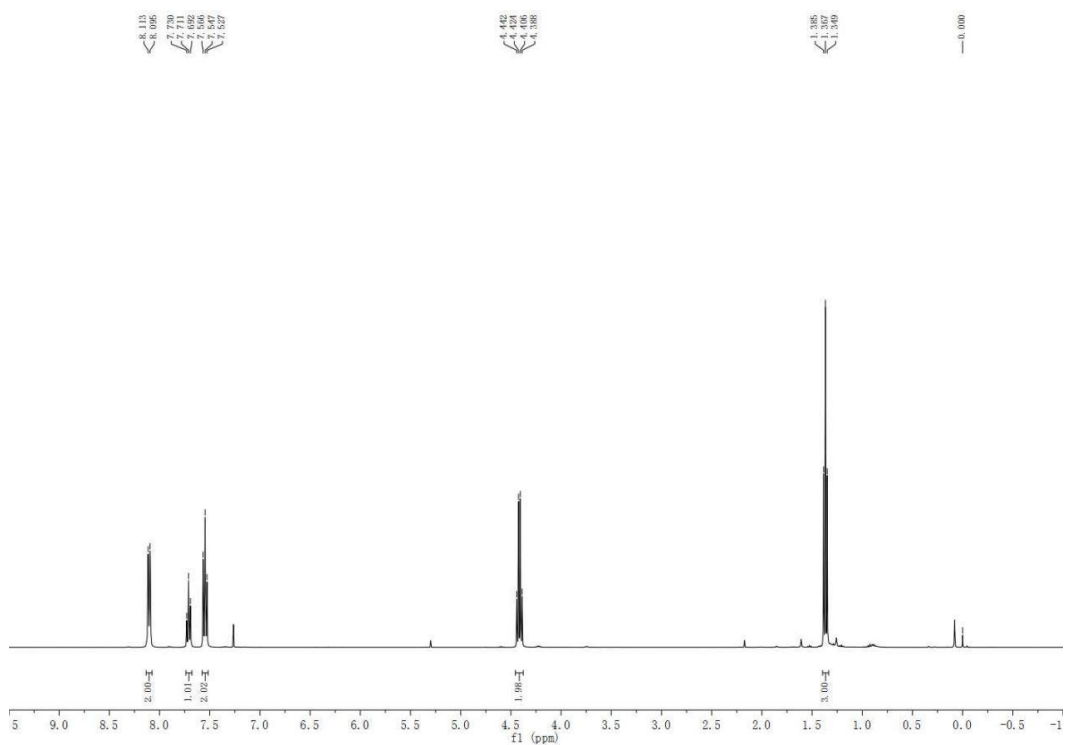

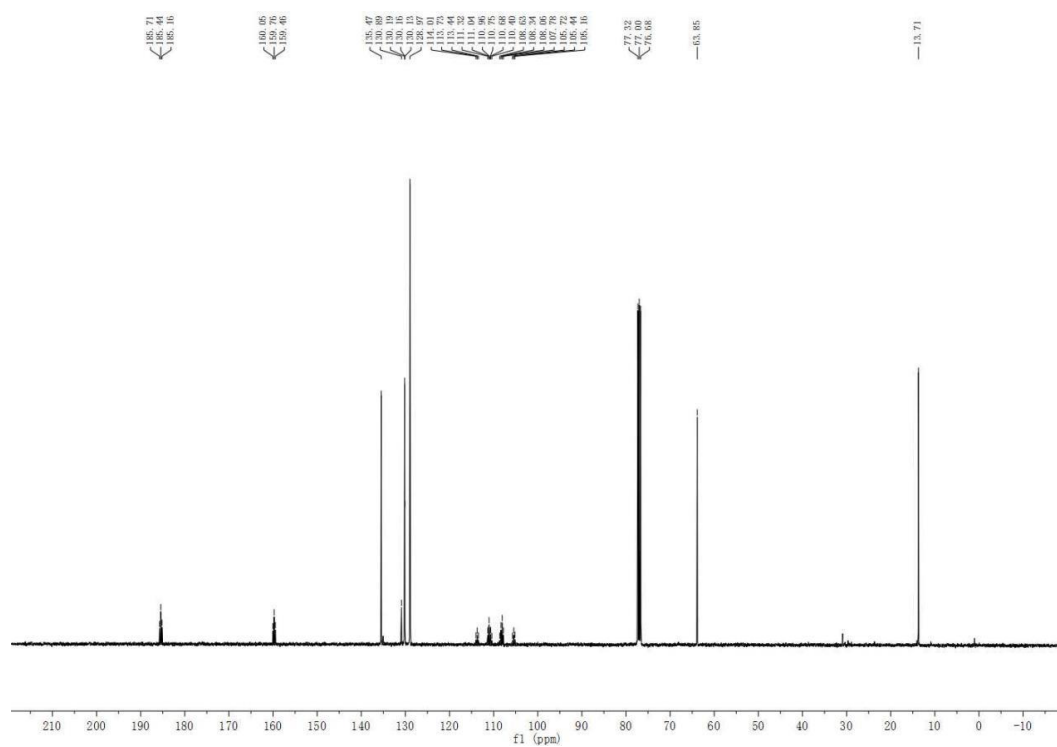

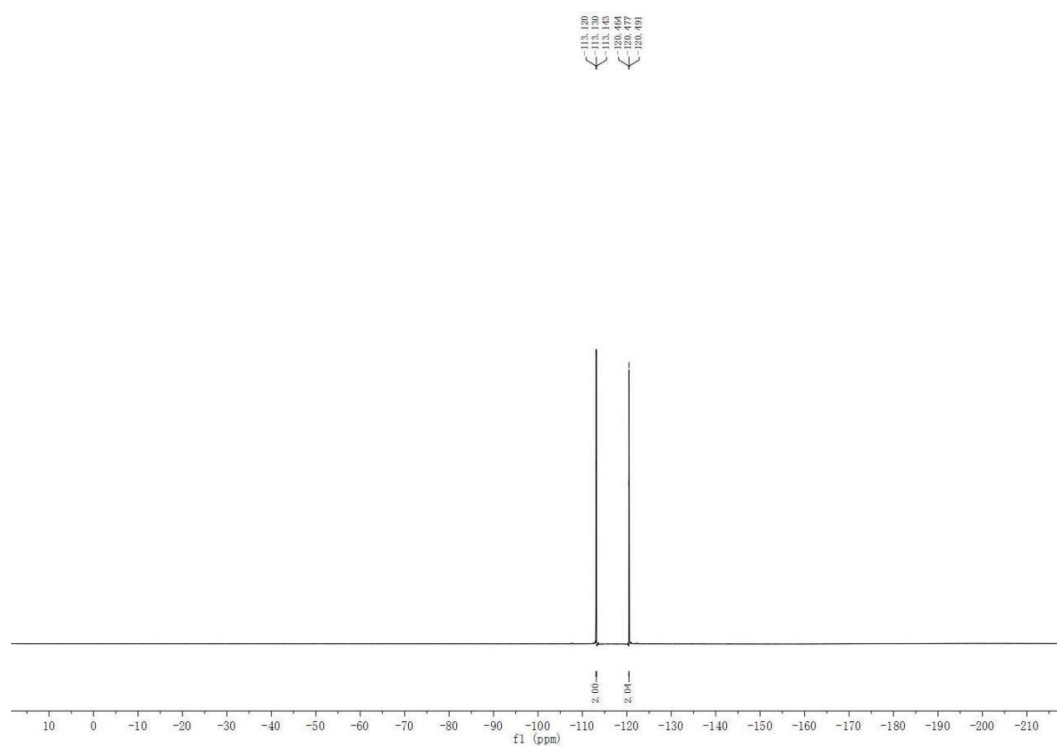

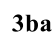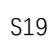

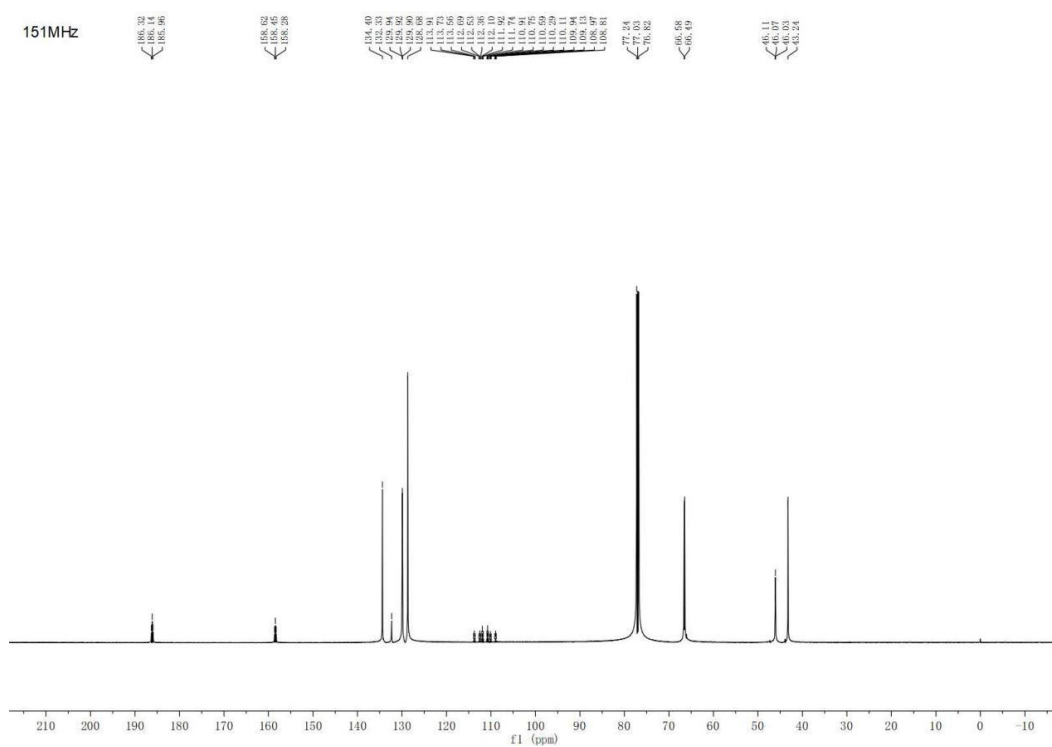

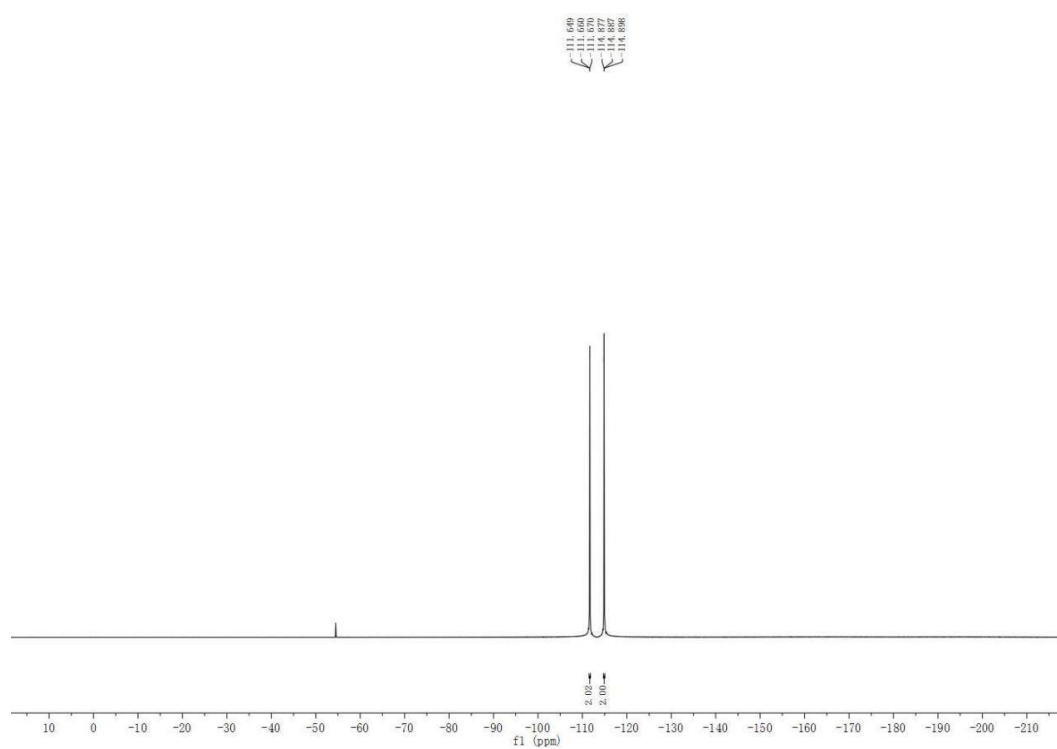

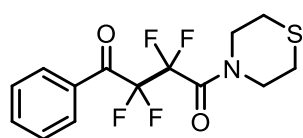

**3ca**

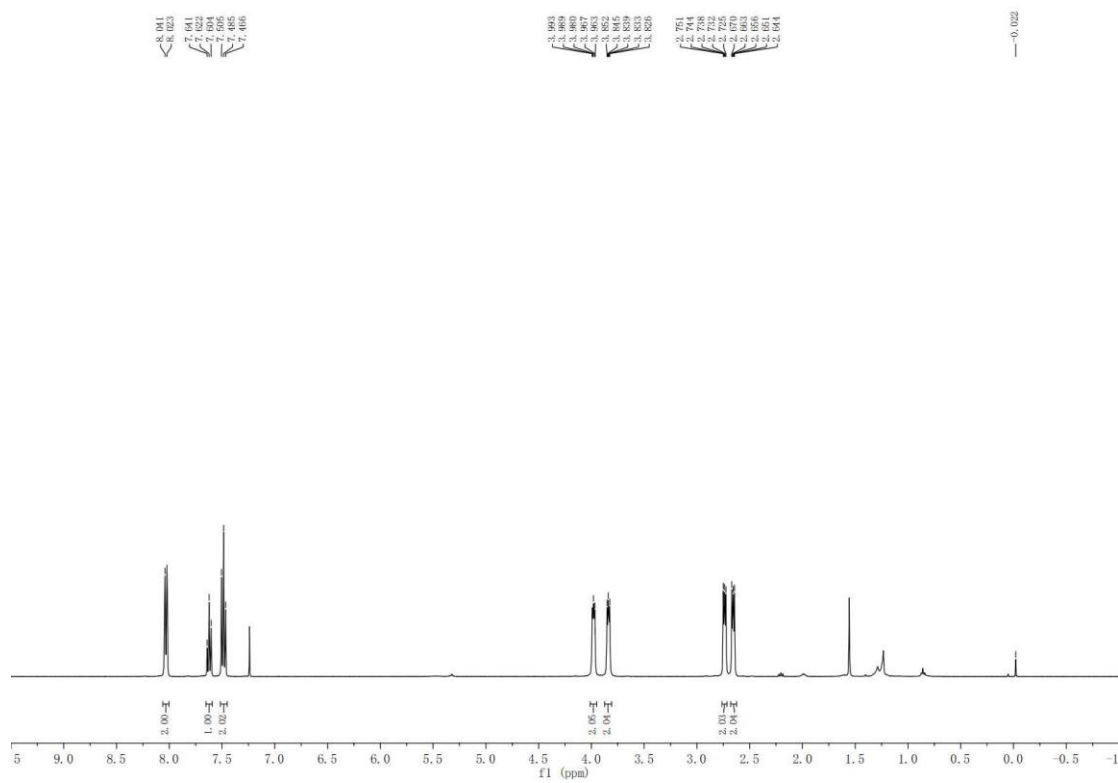



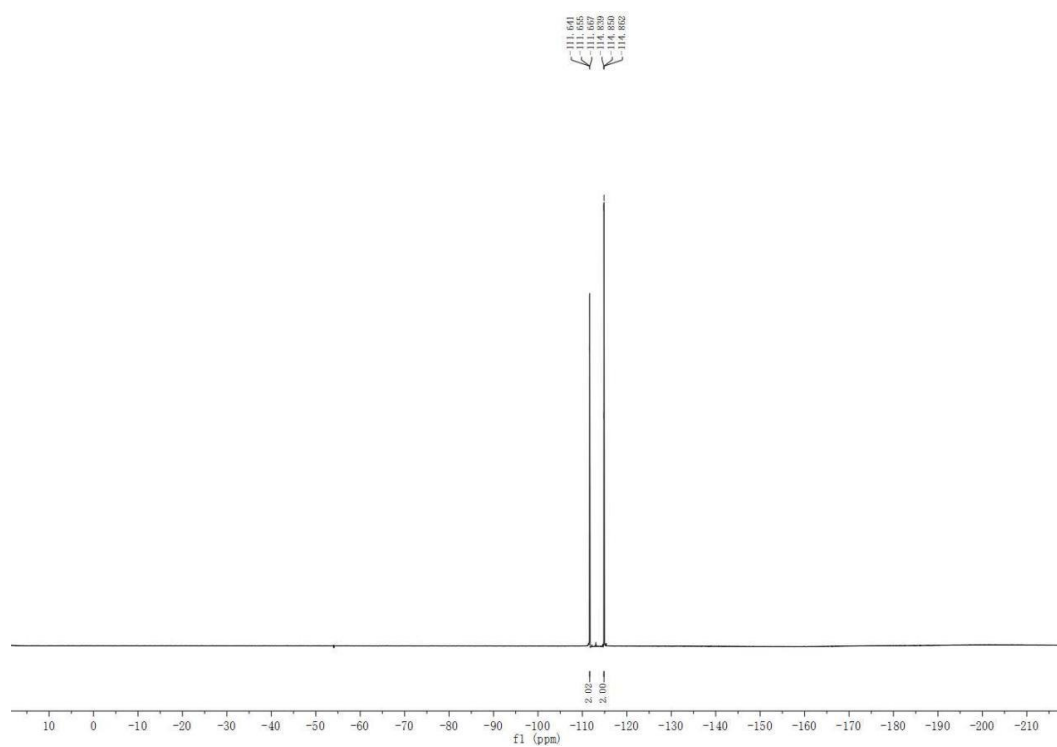

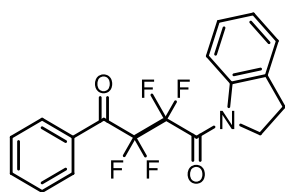

**3da**

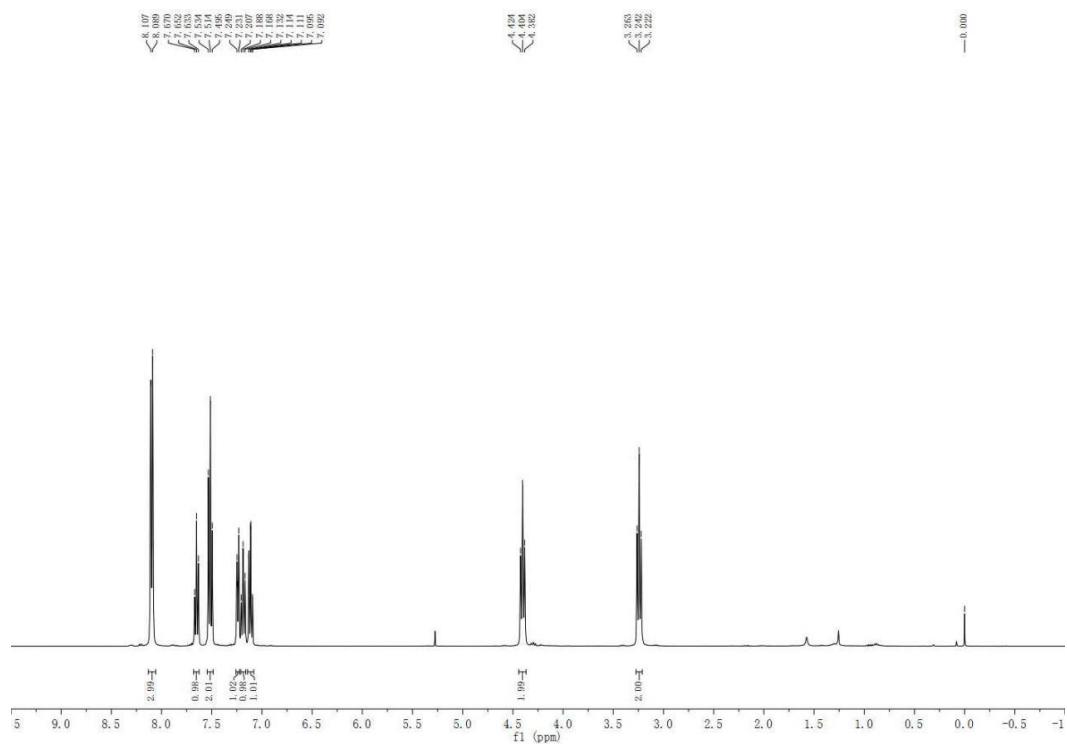

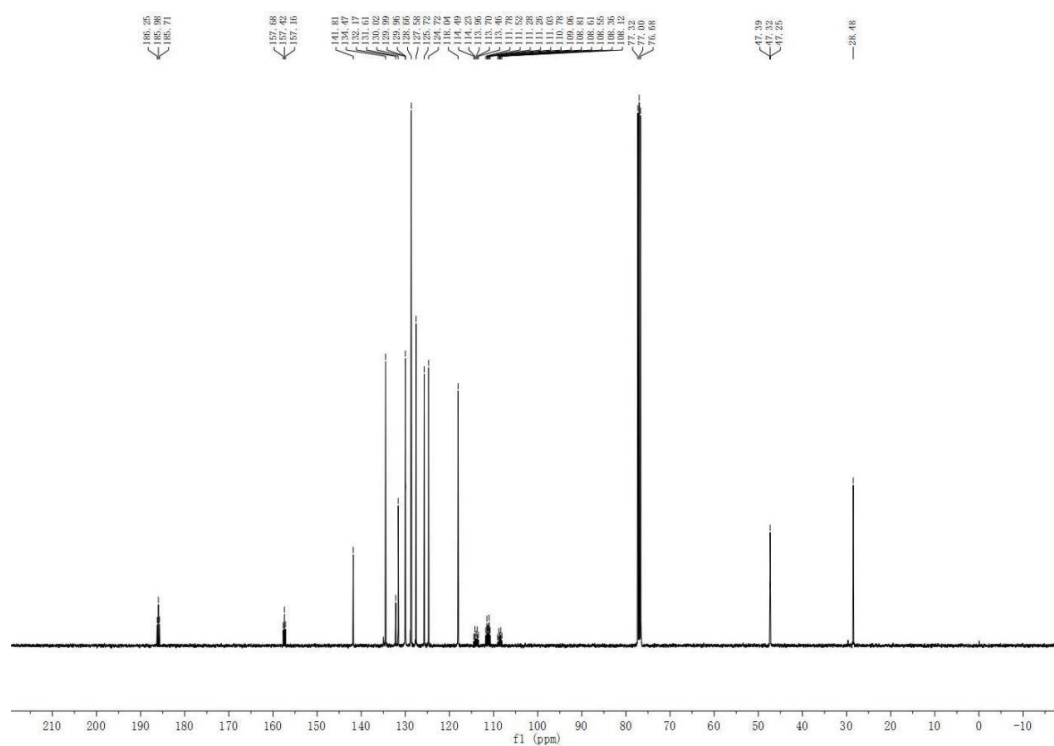

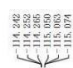

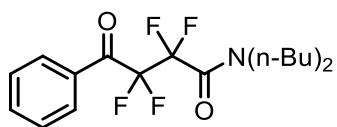

**3ea**

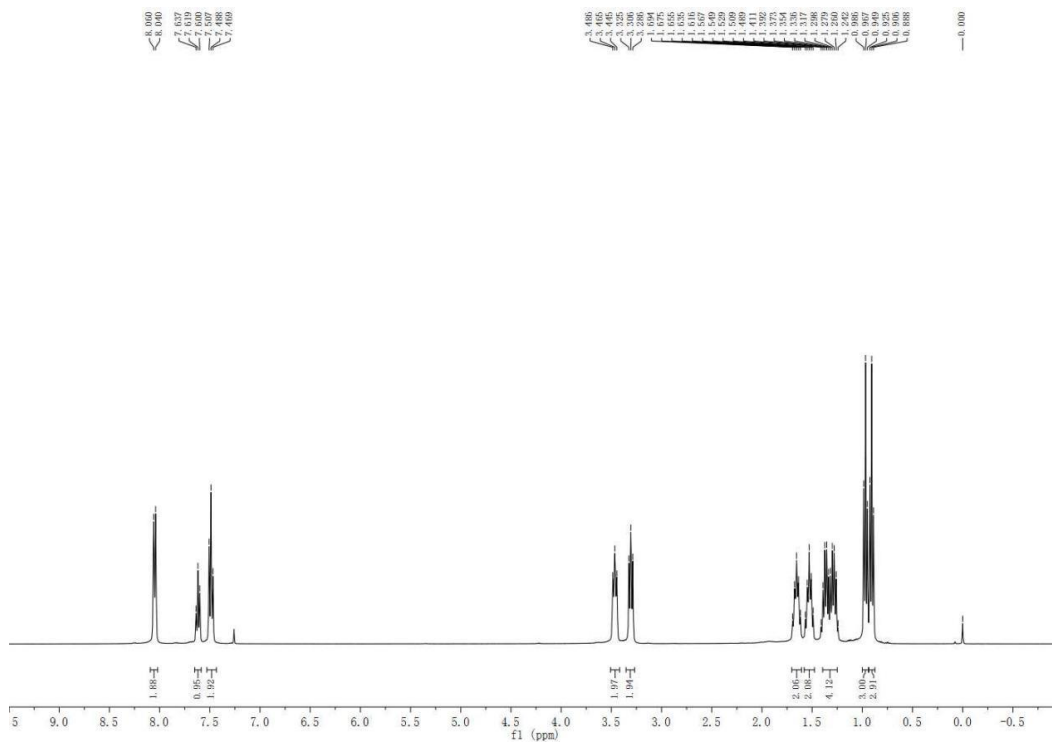

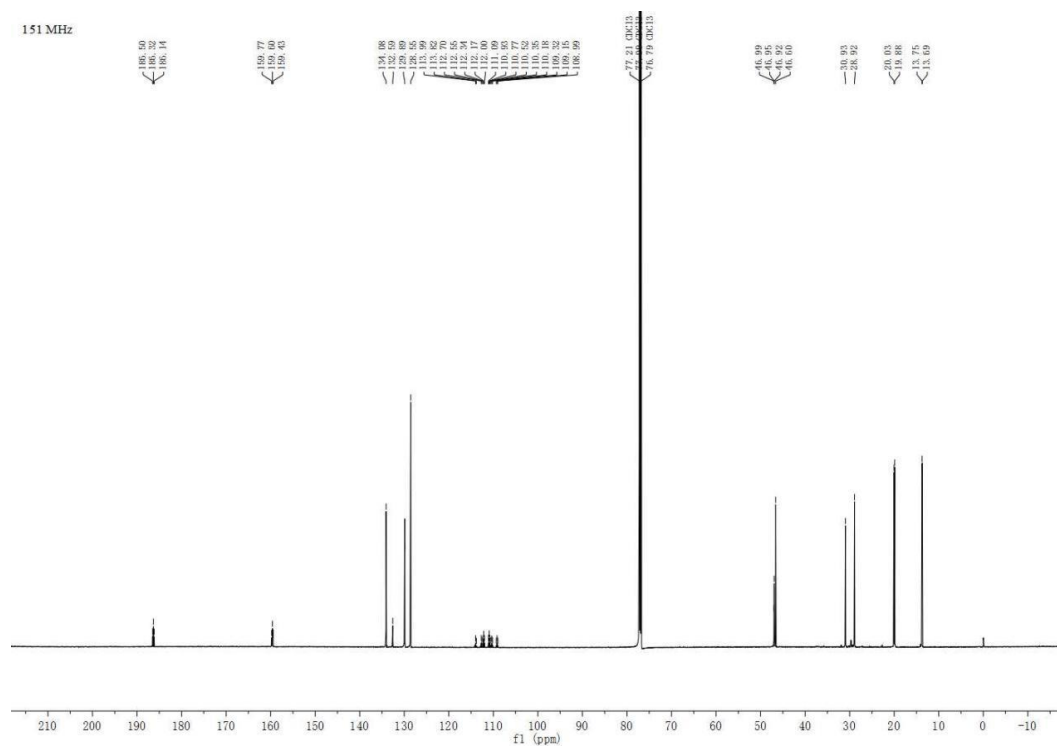

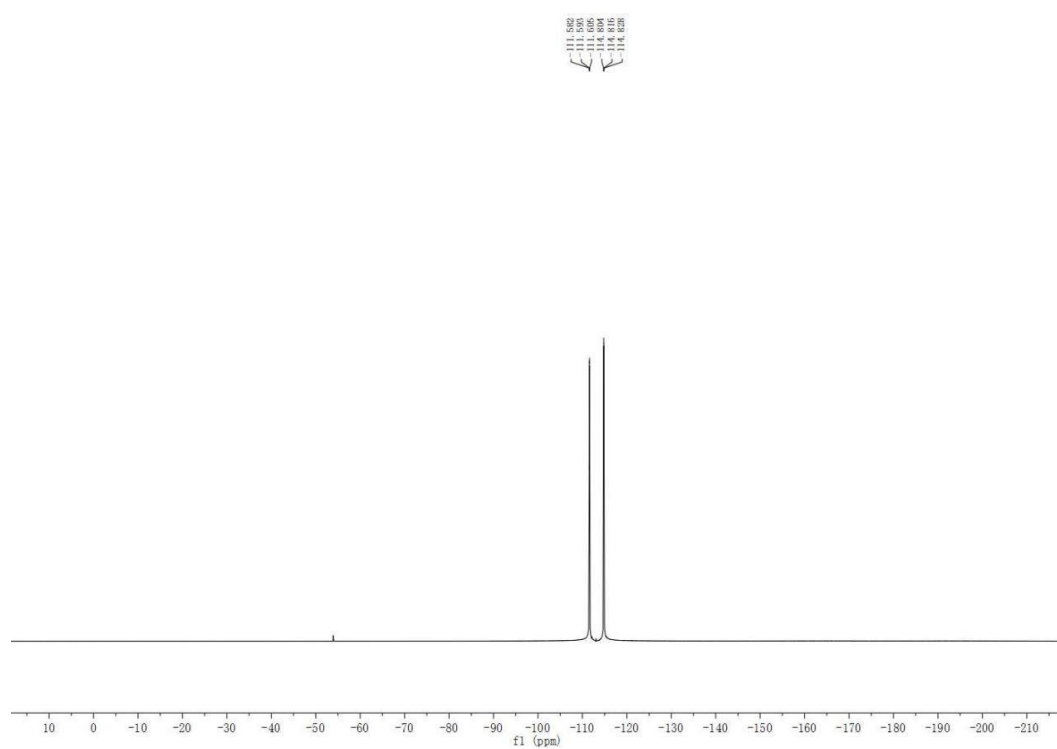

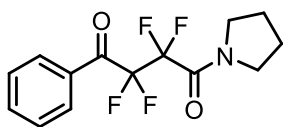

**3fa**

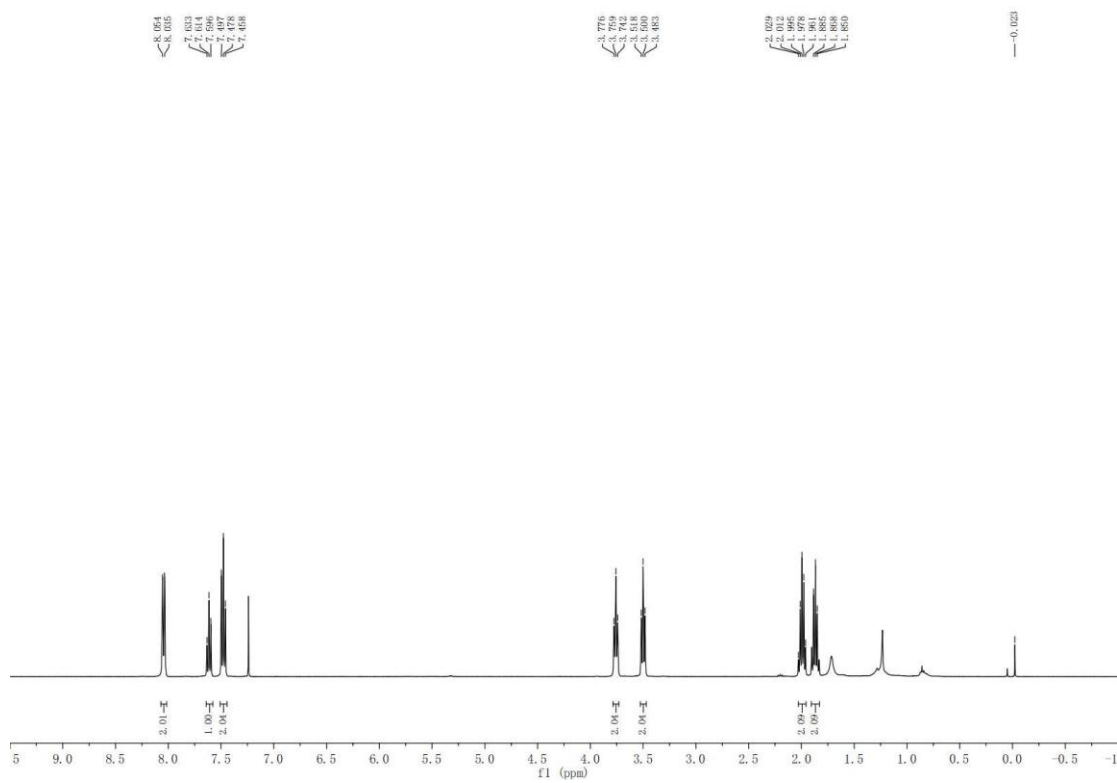

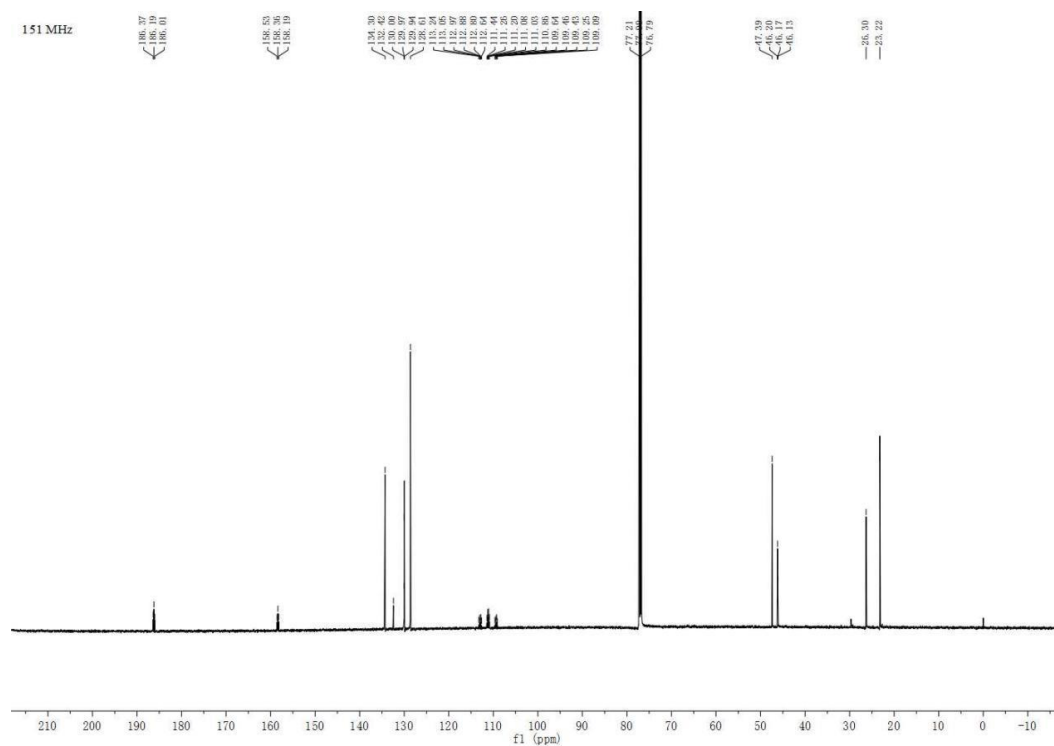

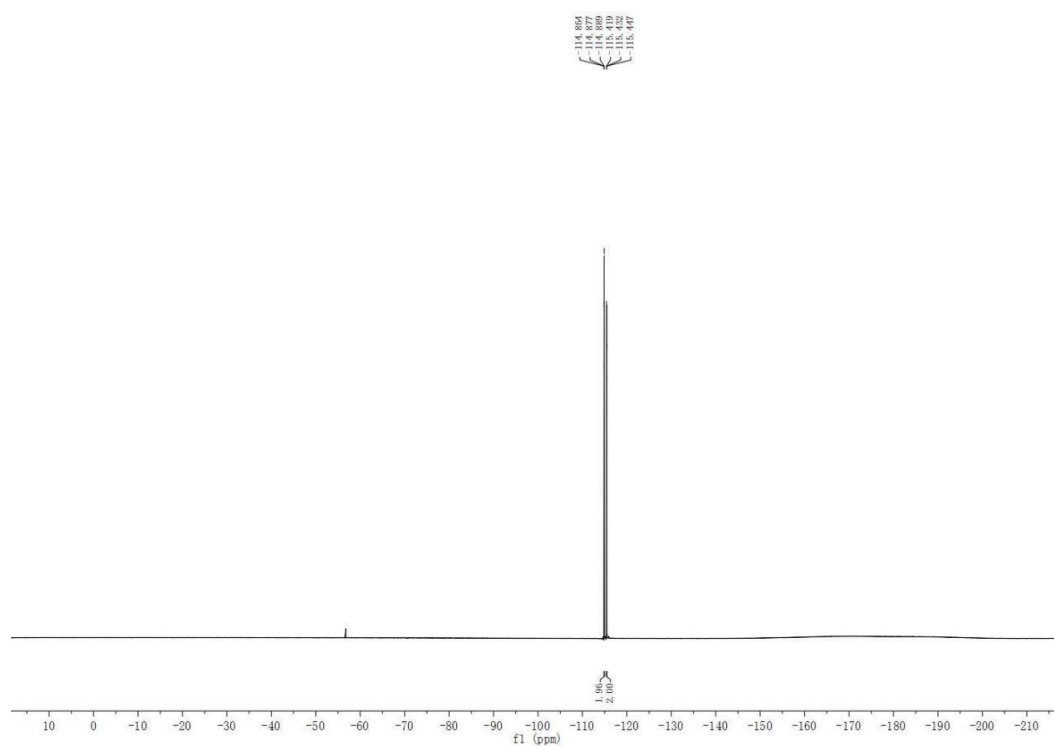

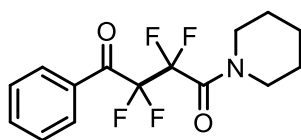

**3ga**

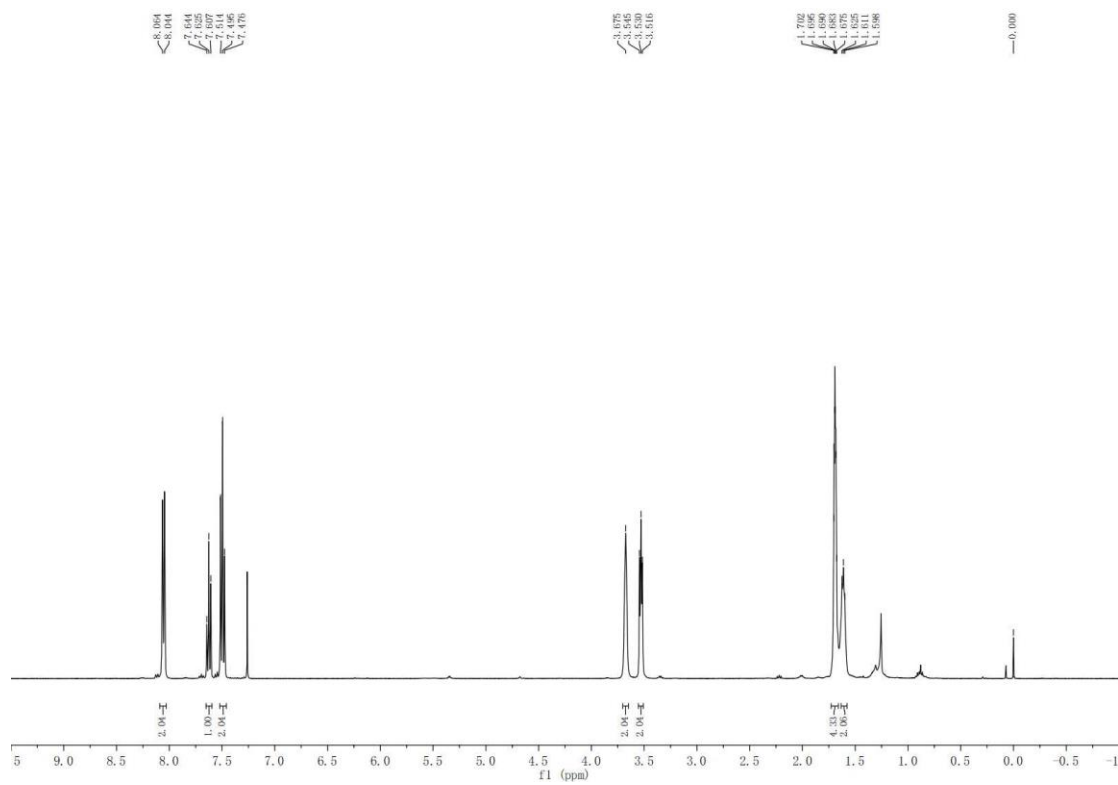

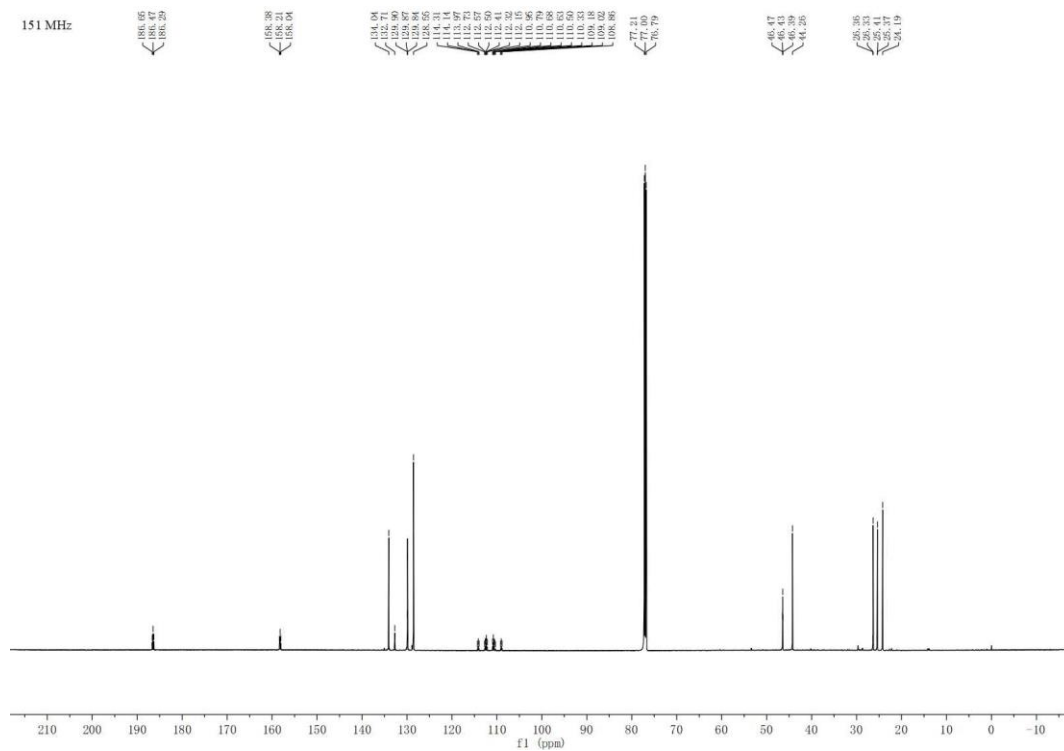

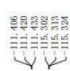

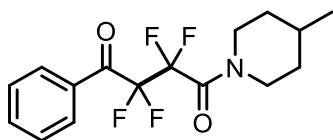

**3ha**

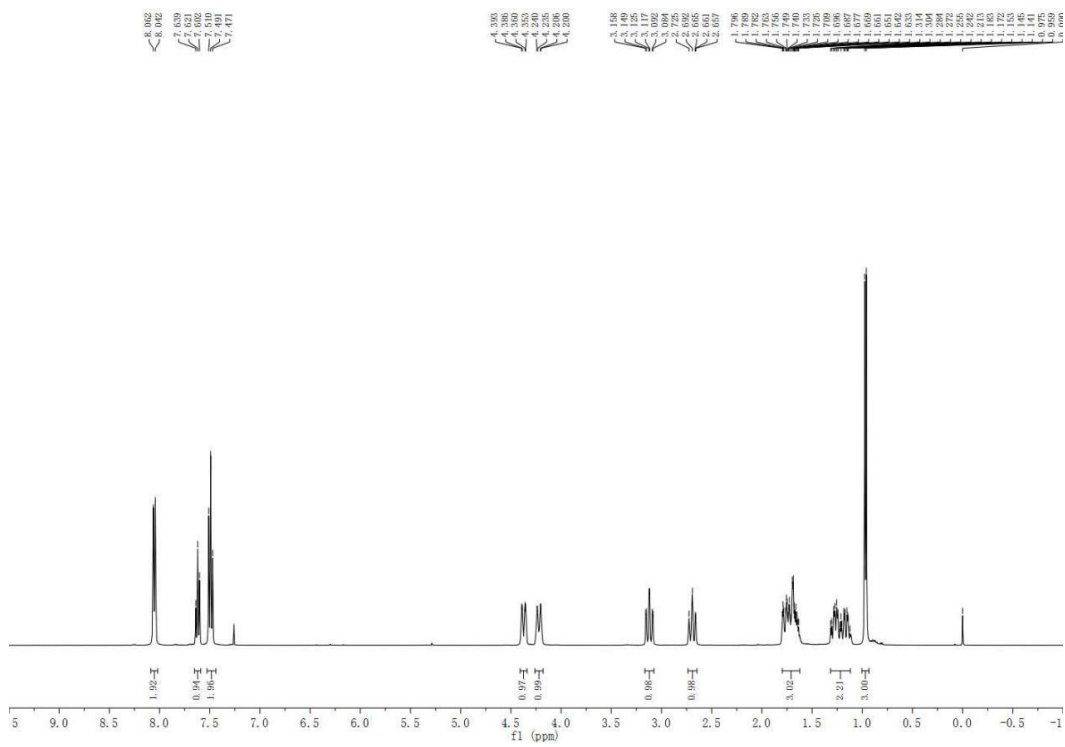



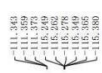

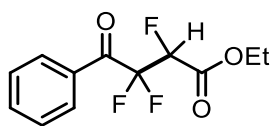

**3ia**

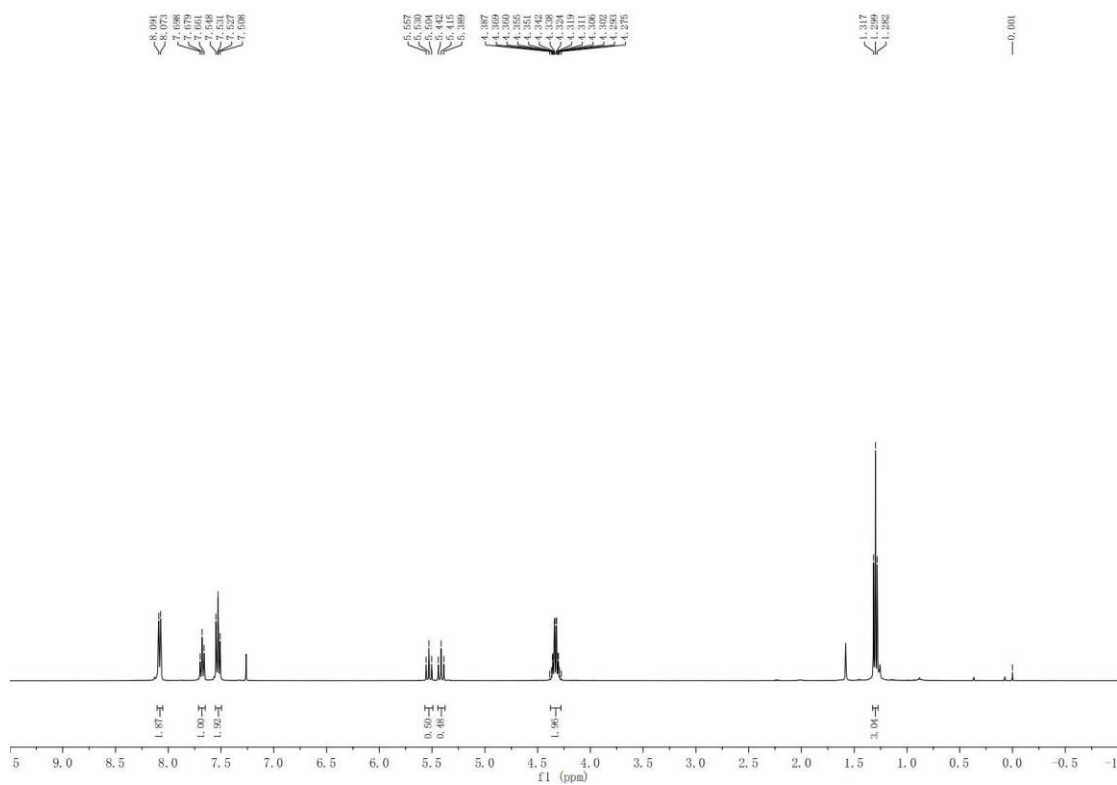

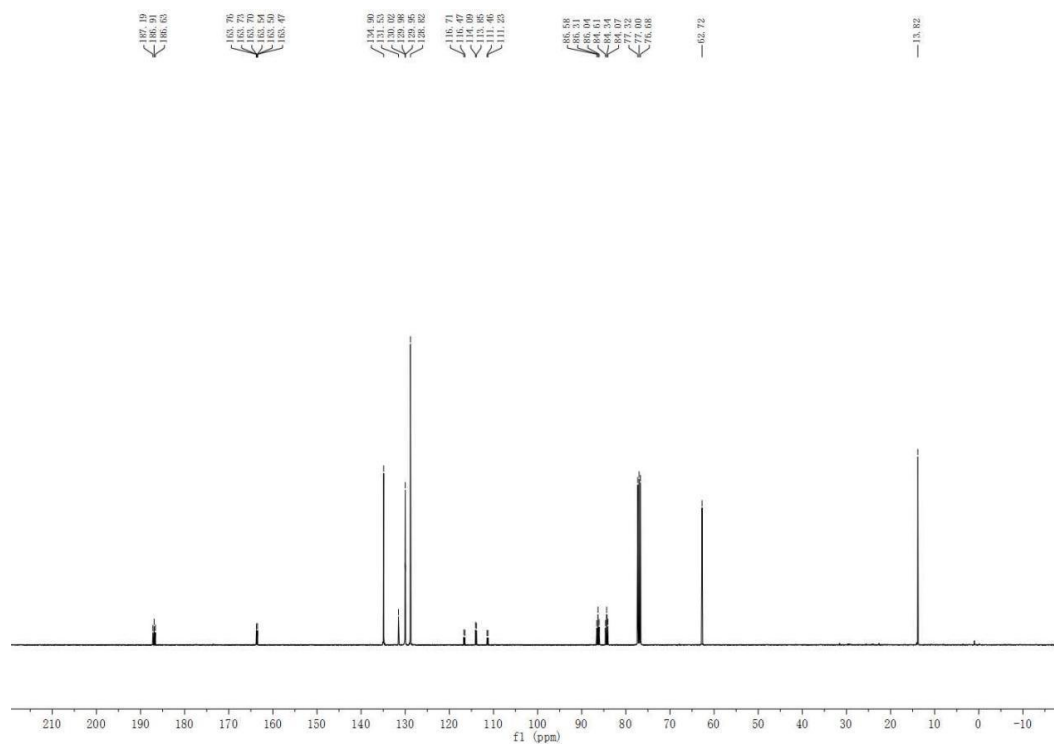

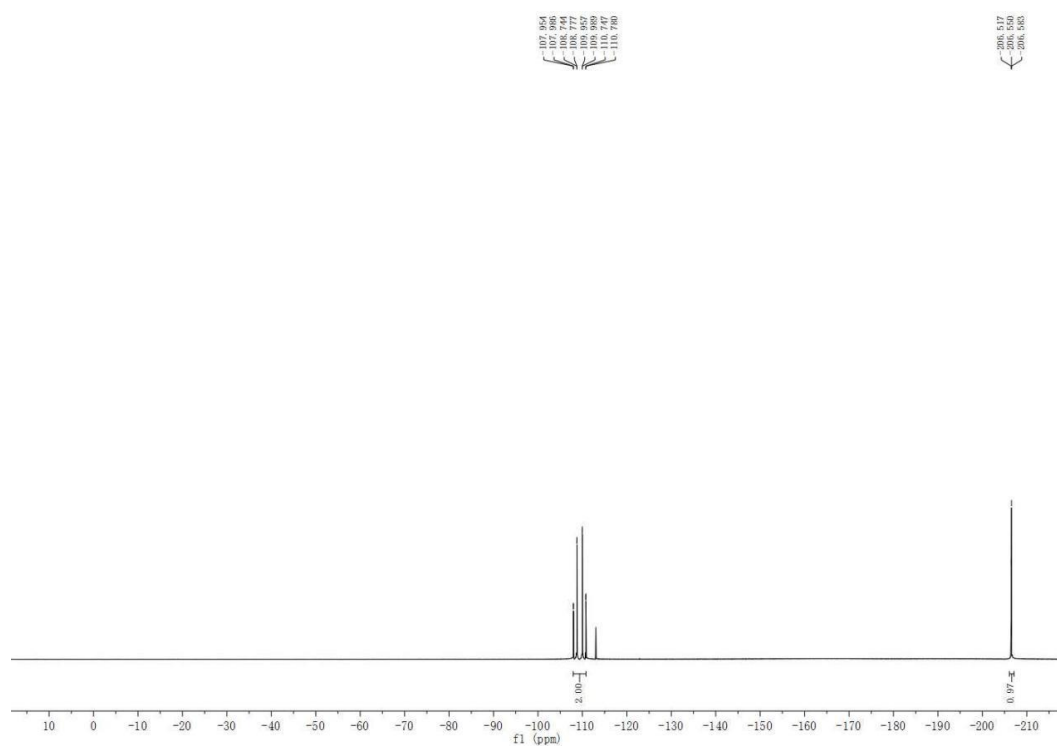

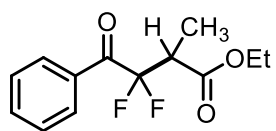

**3ja**

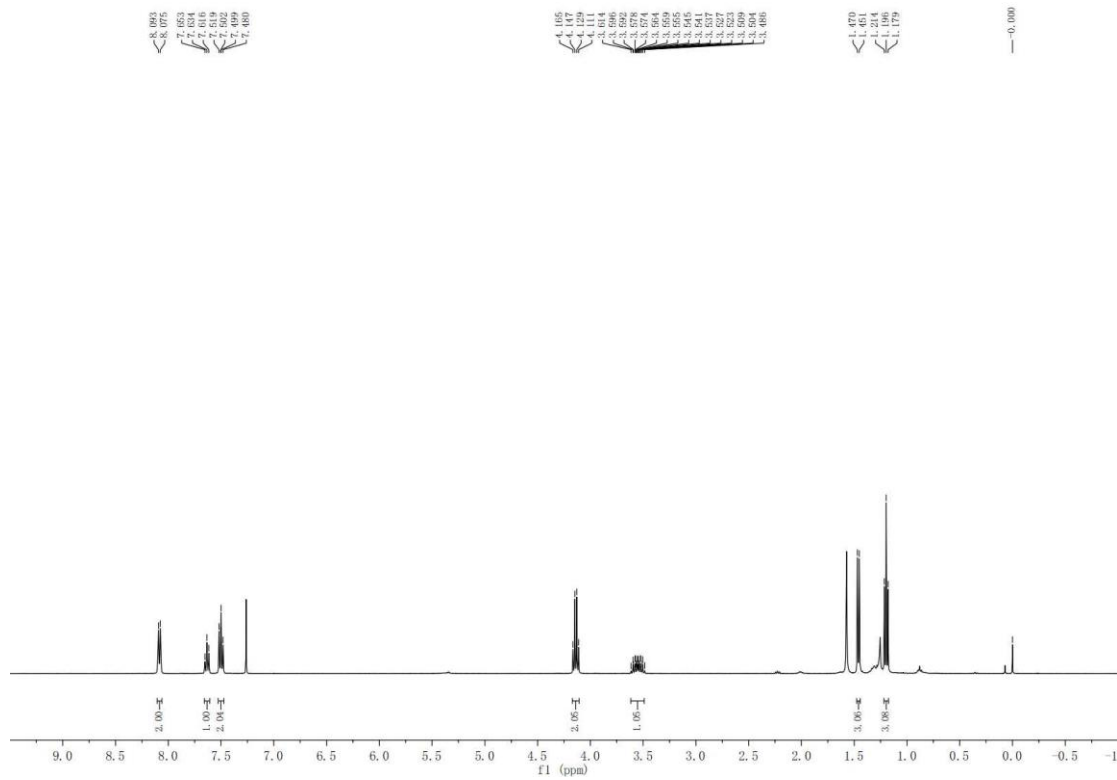

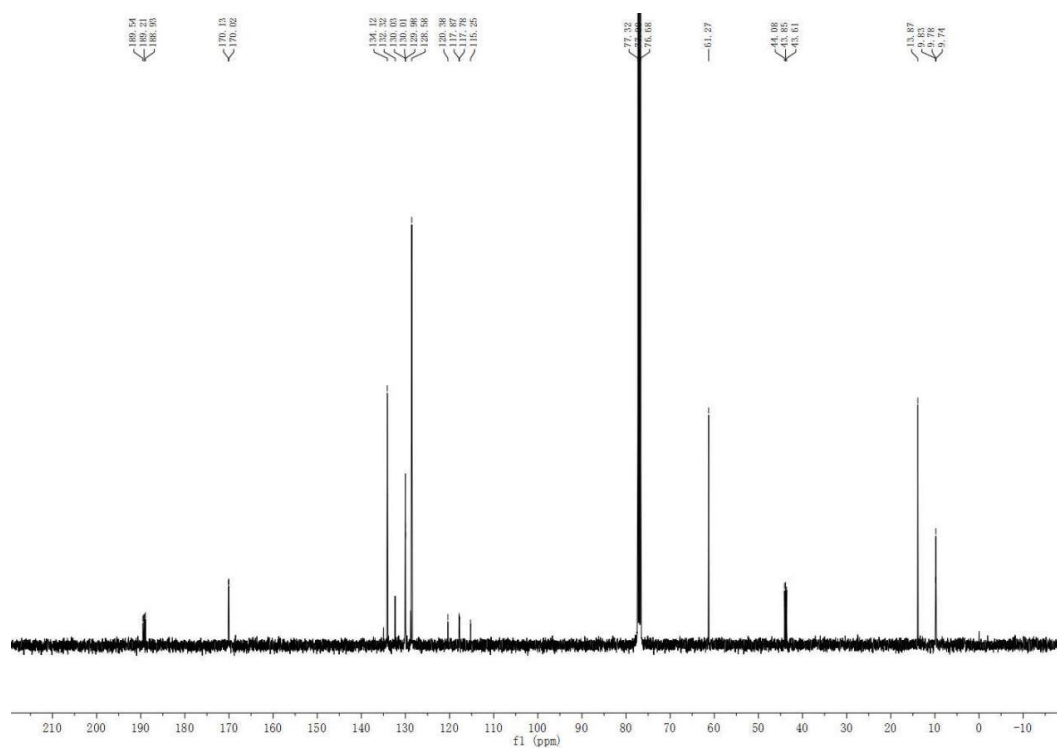

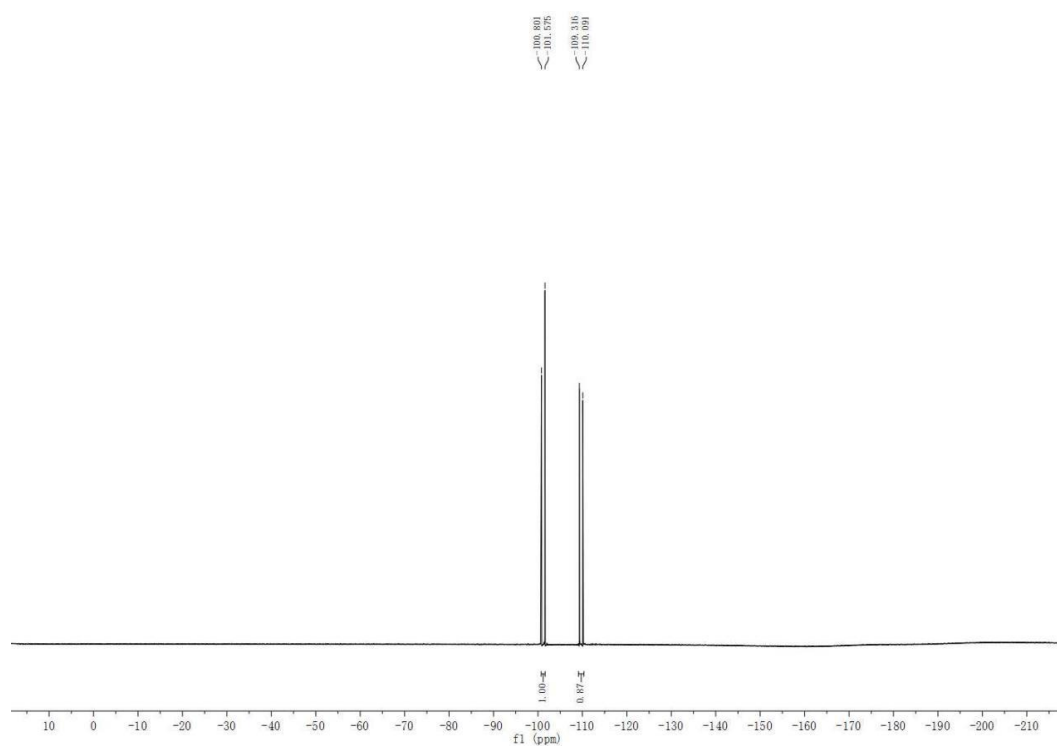

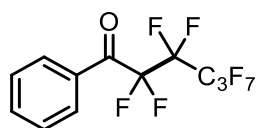

**3ka**

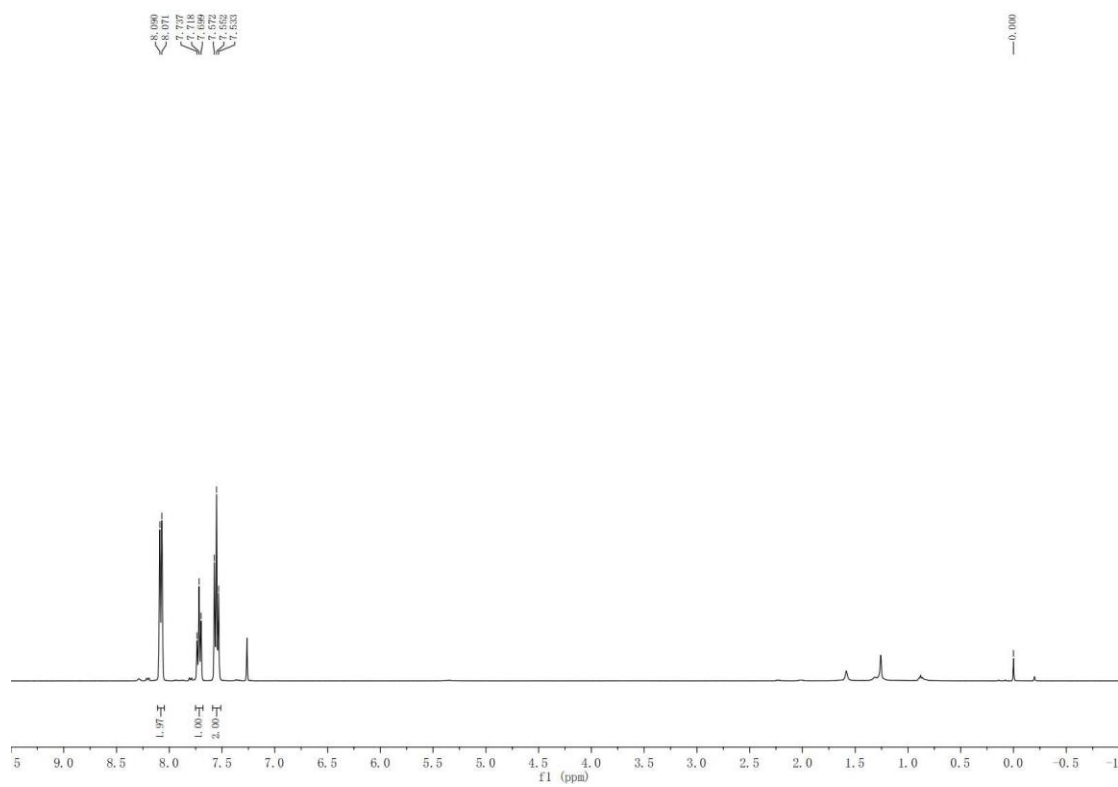

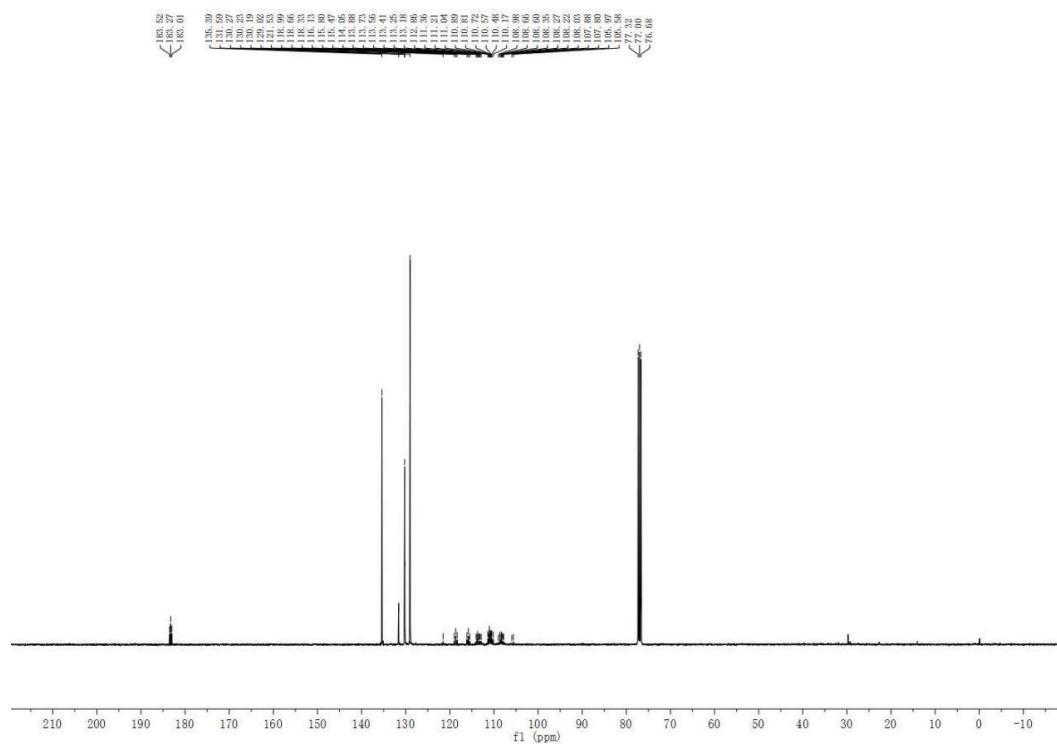



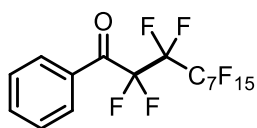

**3la**

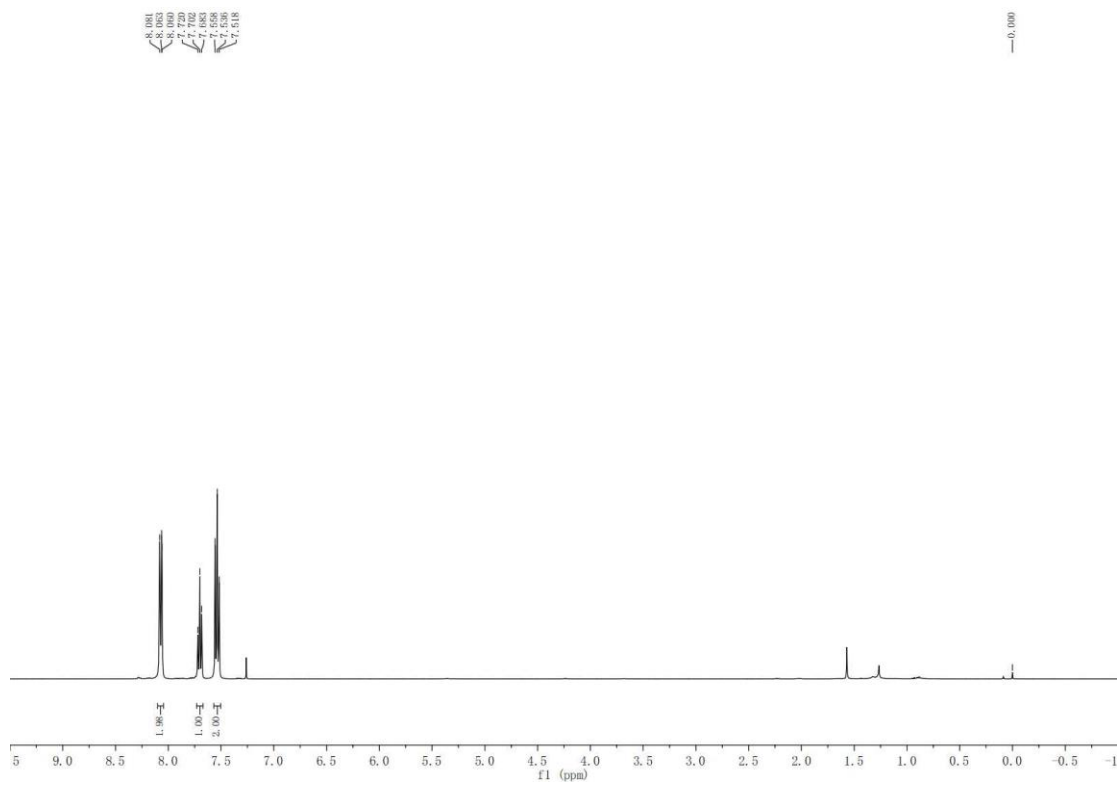

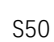

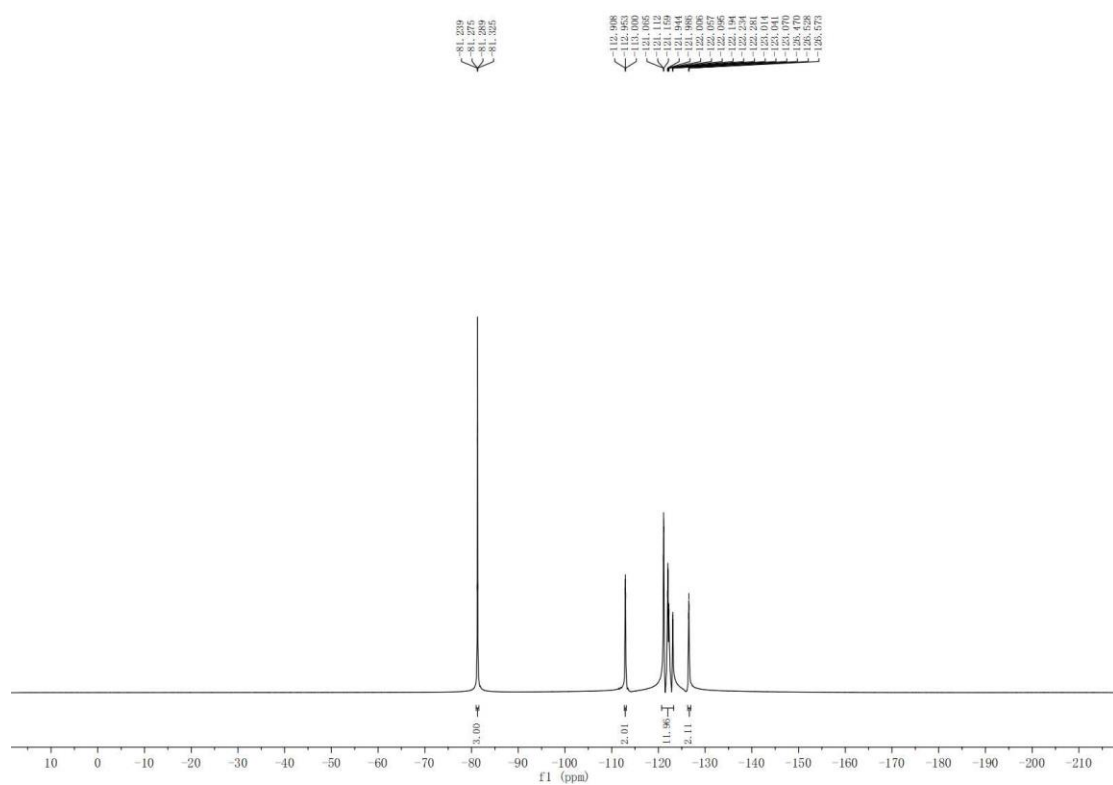

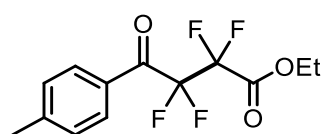

**3ab**

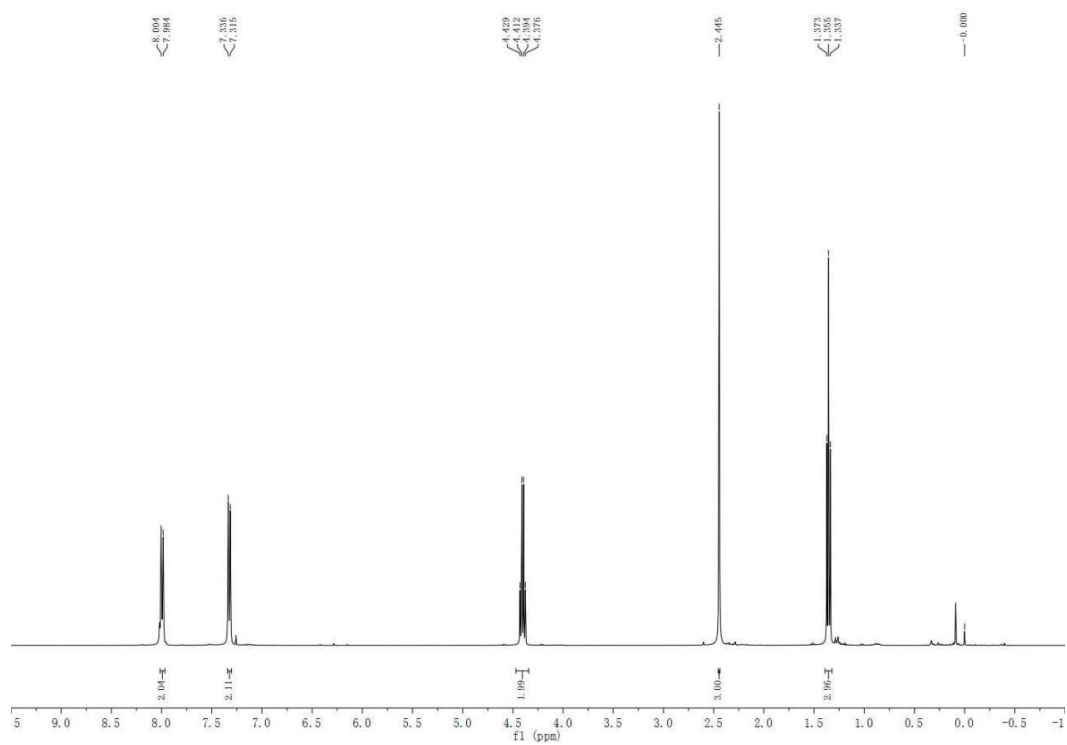

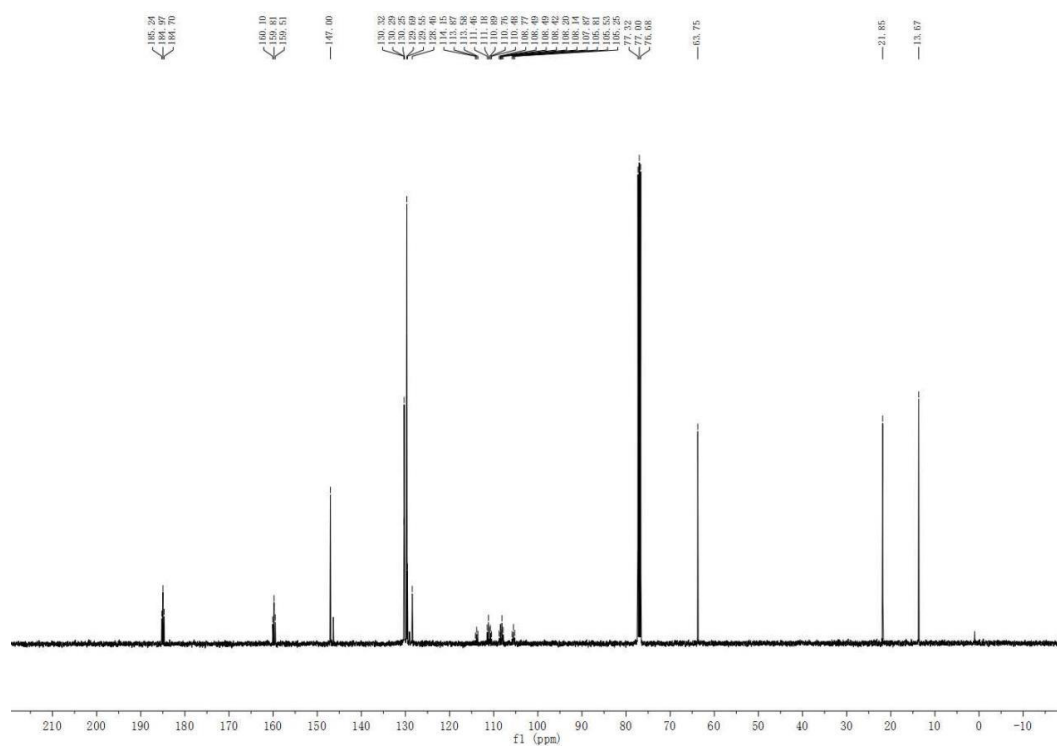

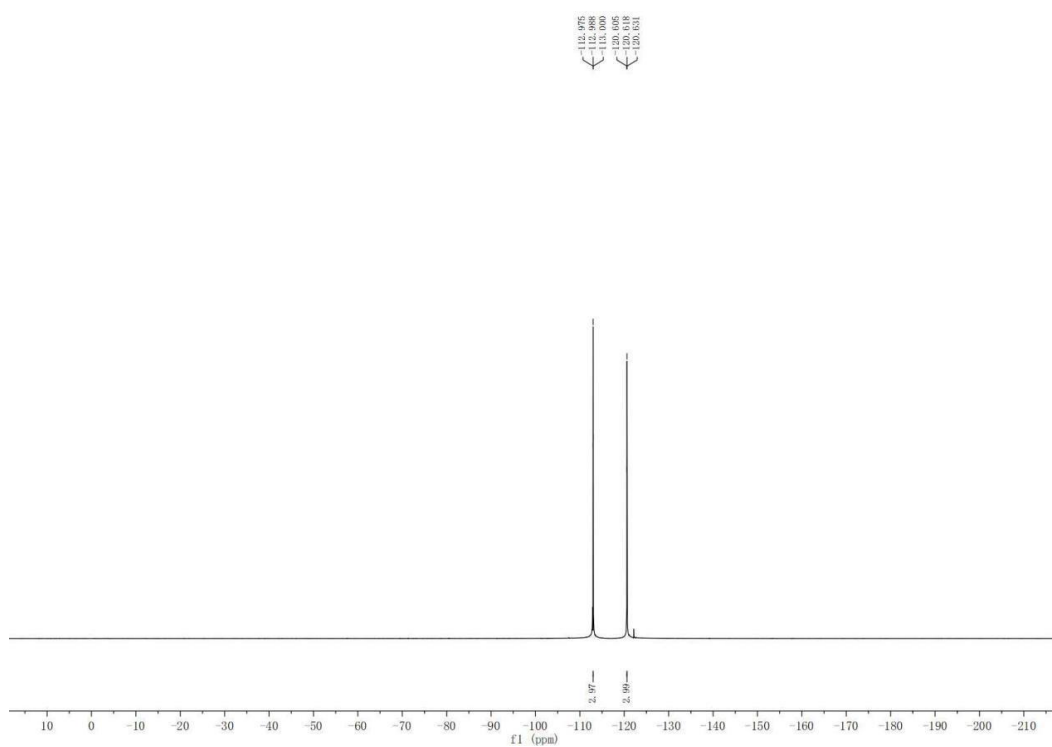

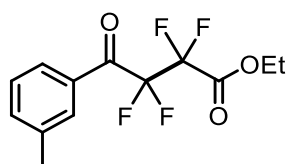

**3ac**

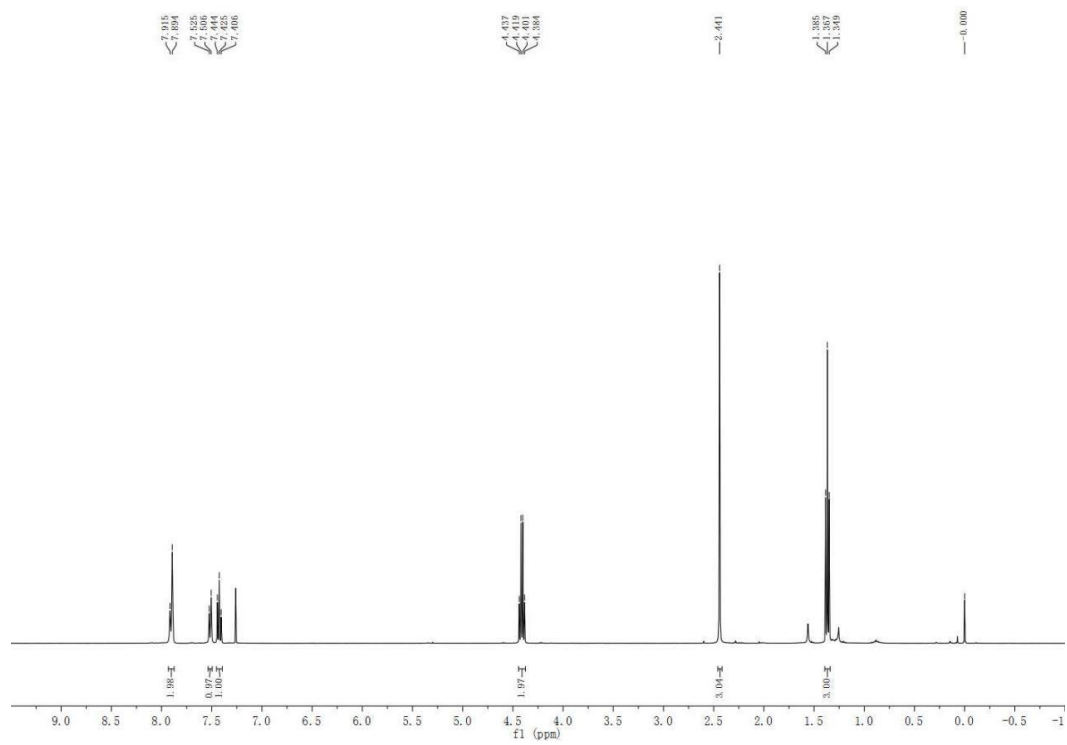

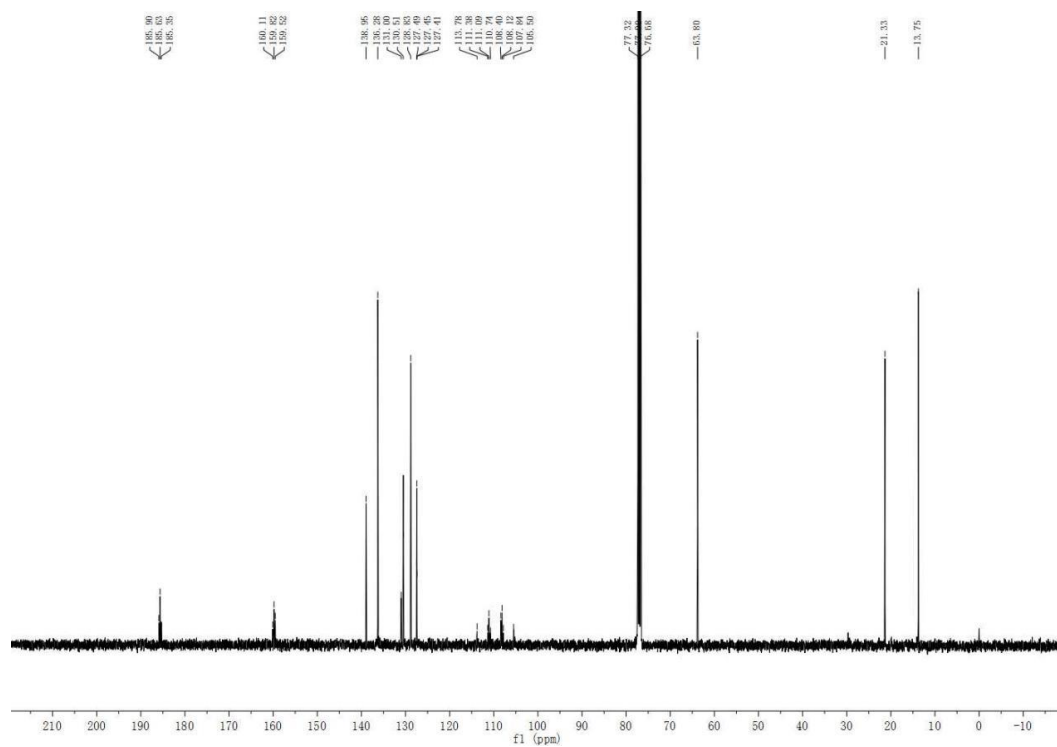

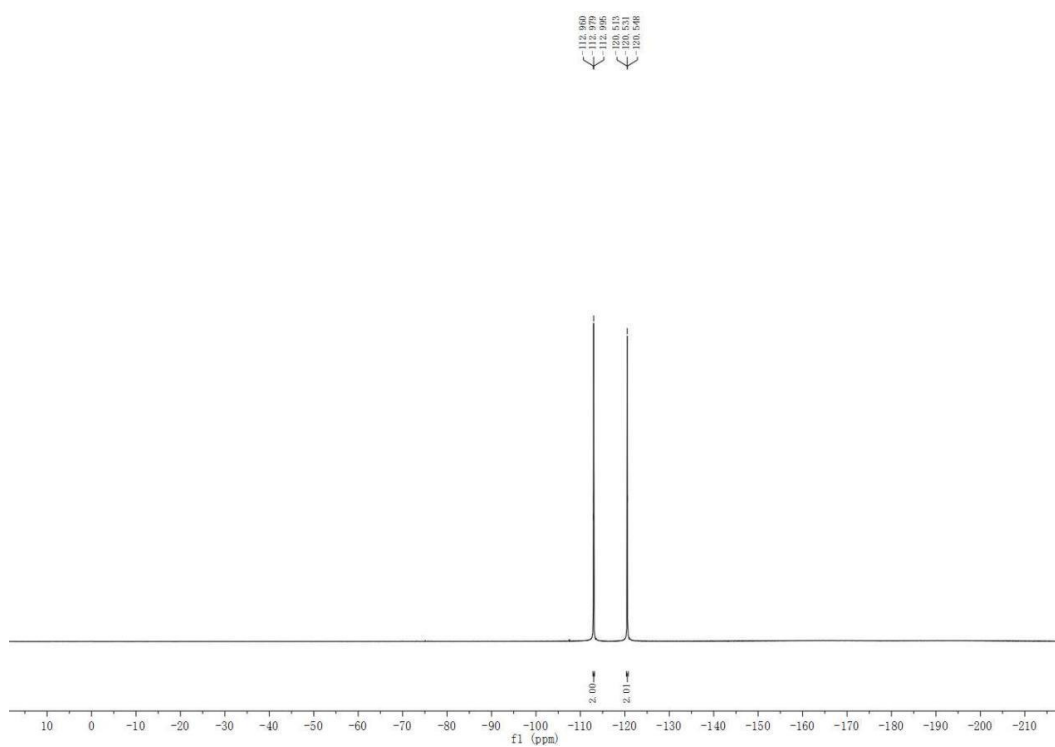

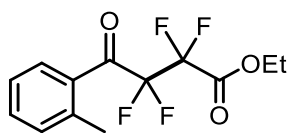

**3ad**

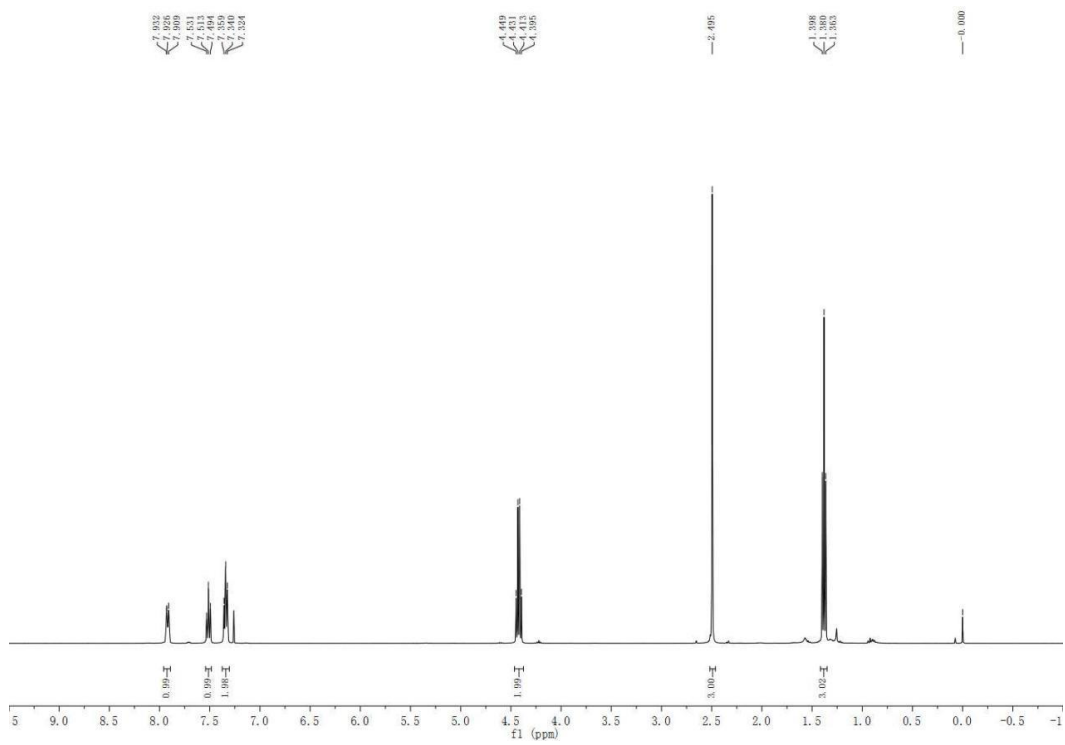

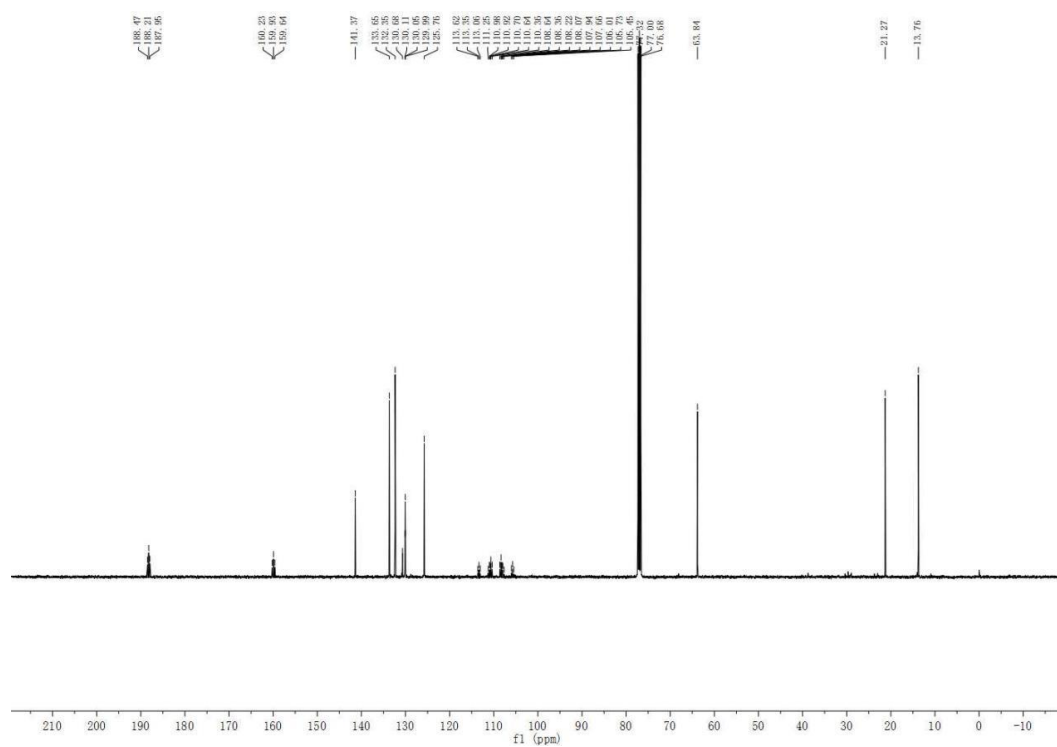

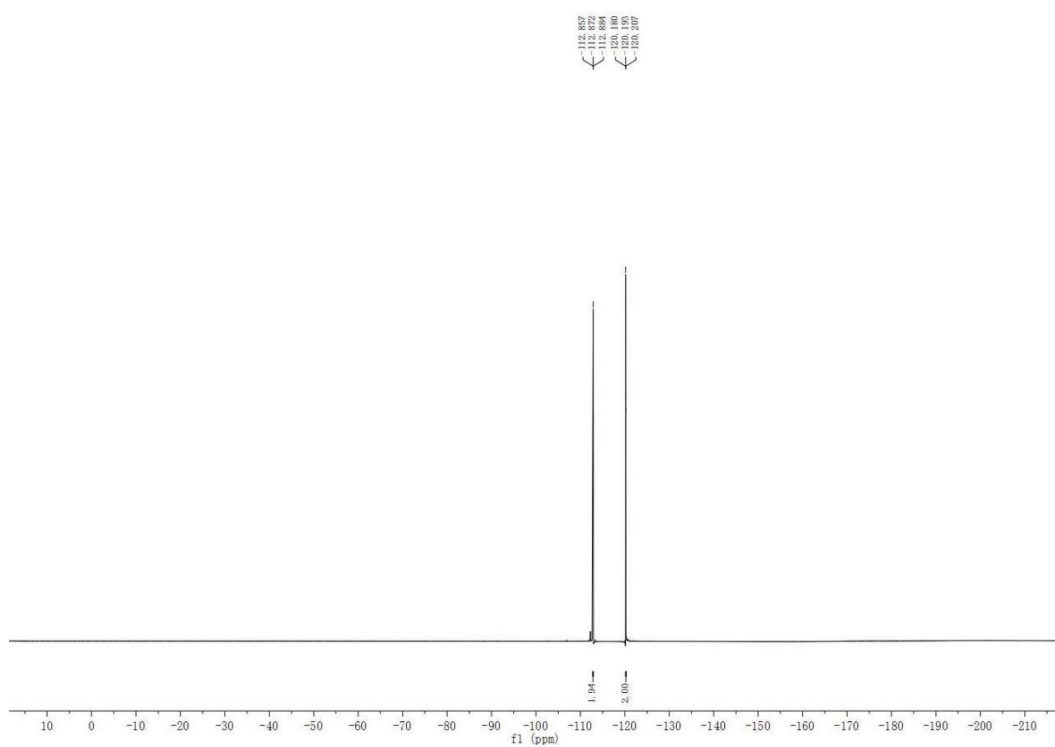

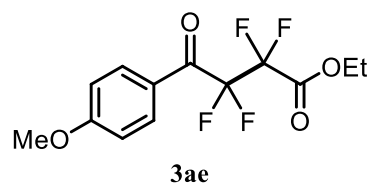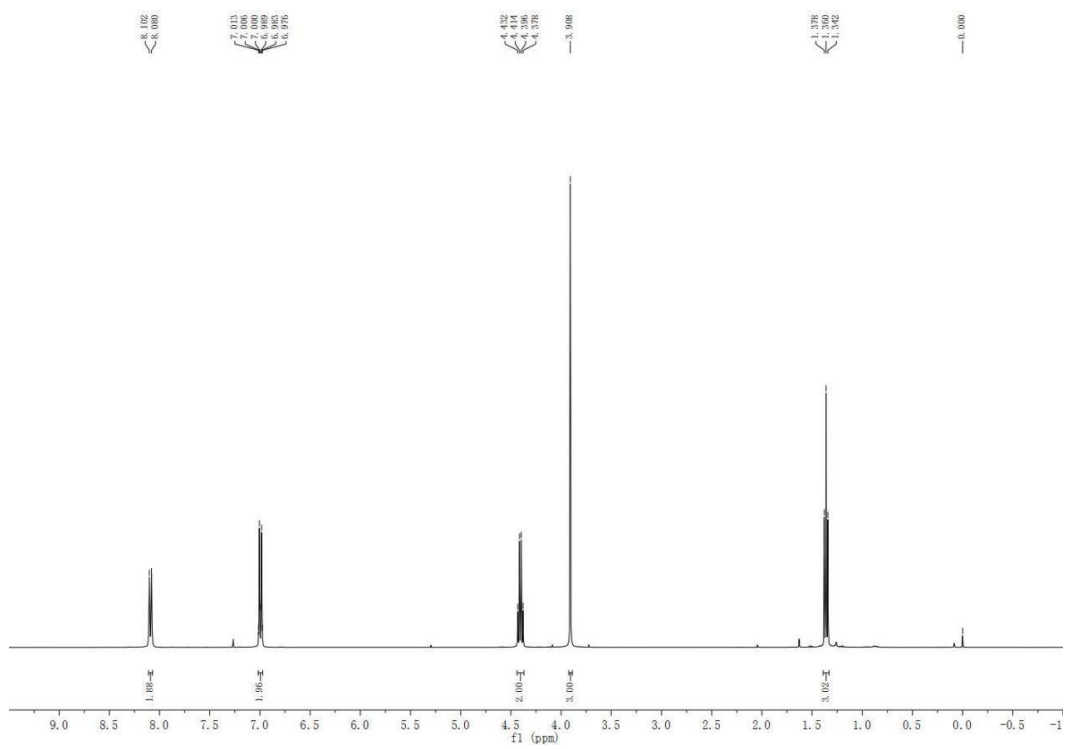

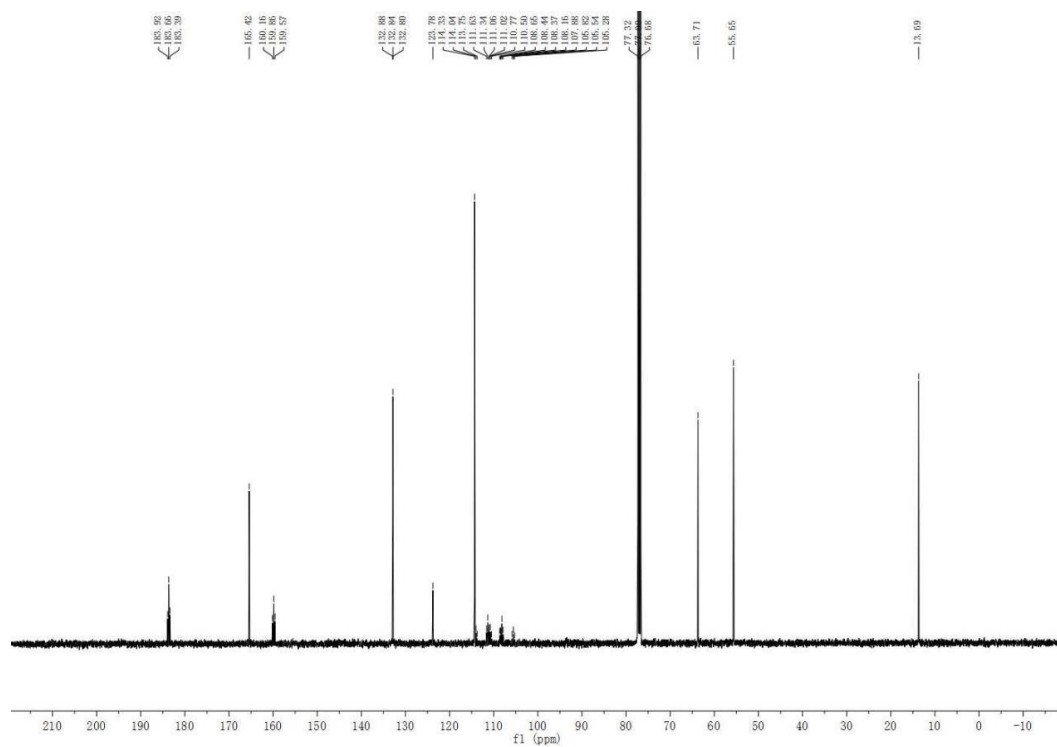

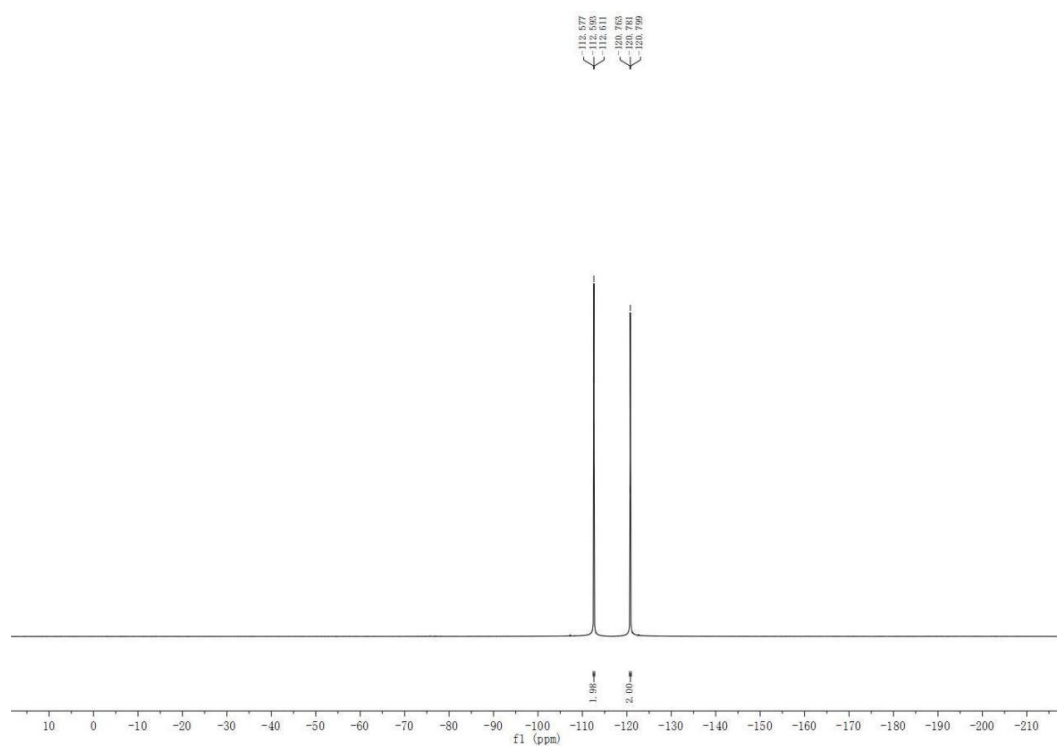

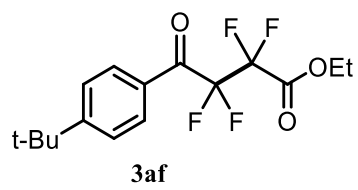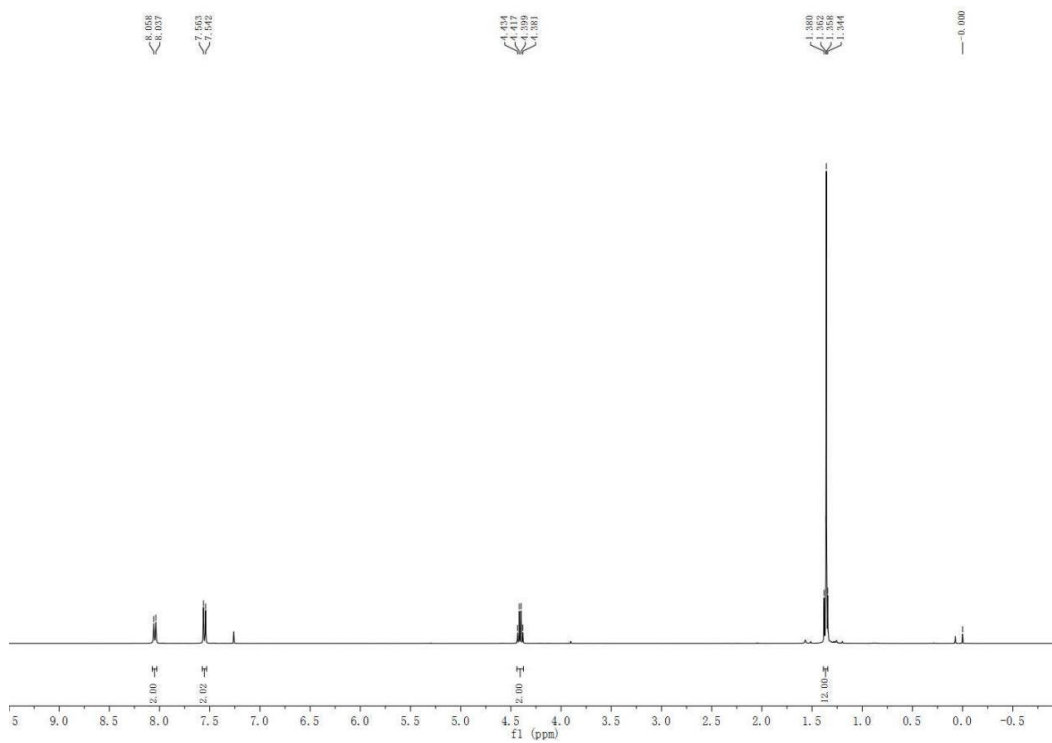

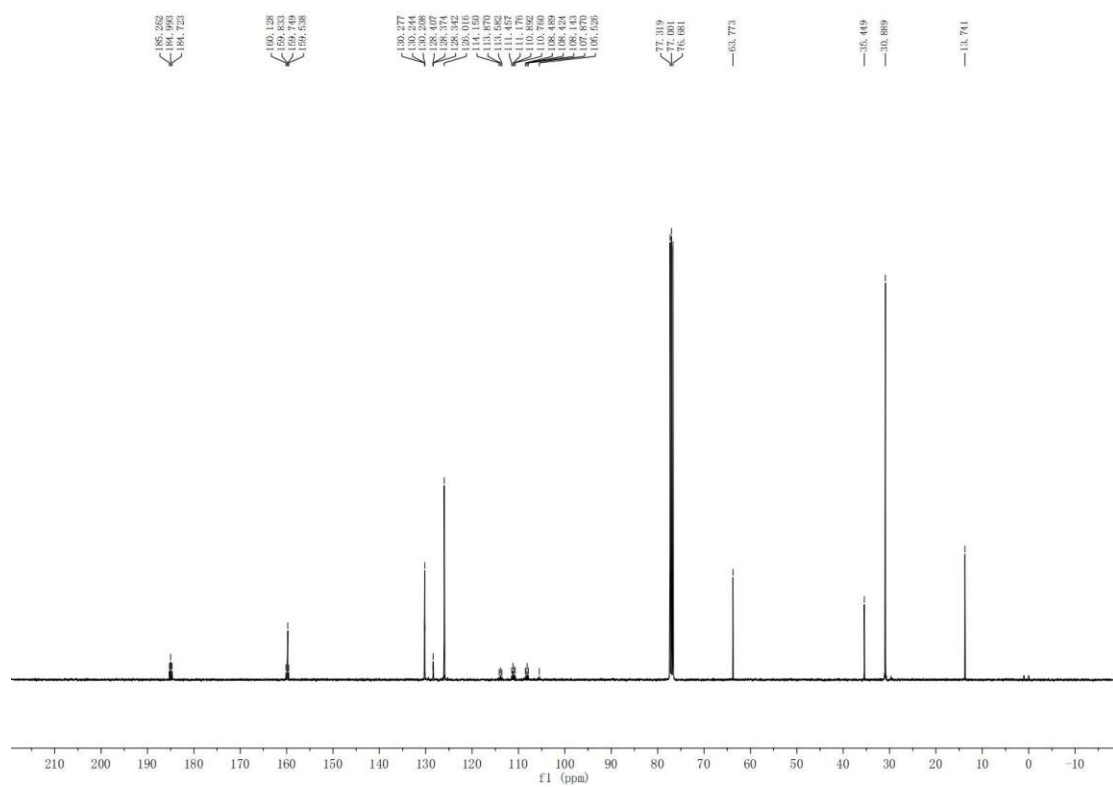

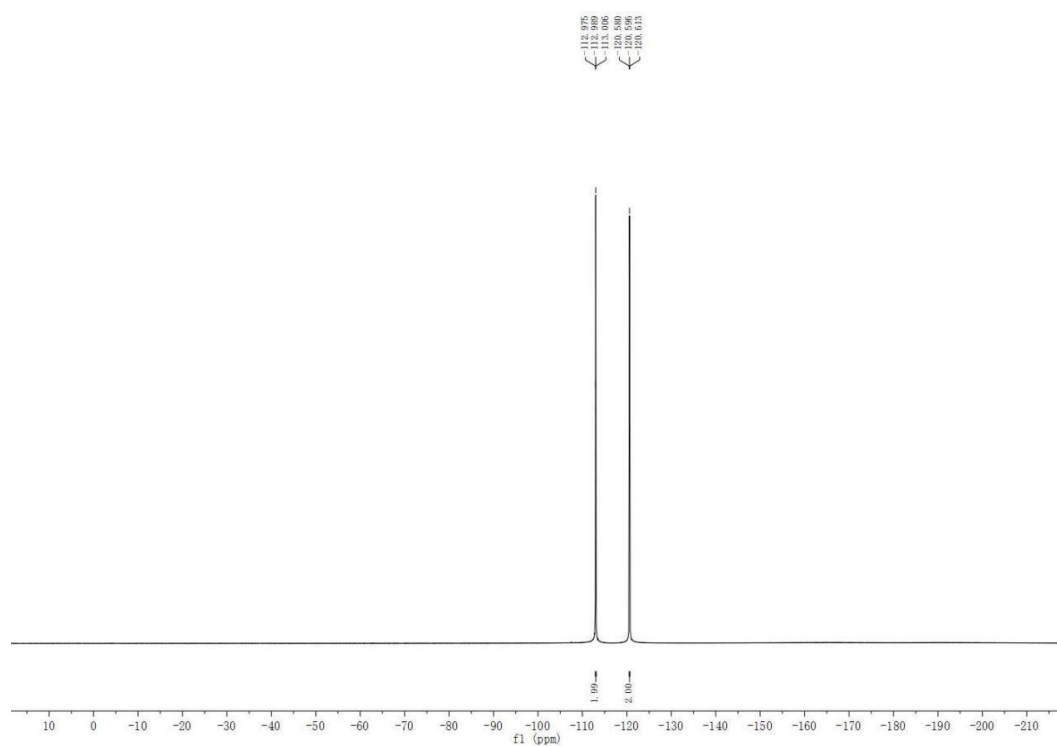

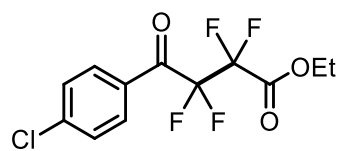

**3ag**

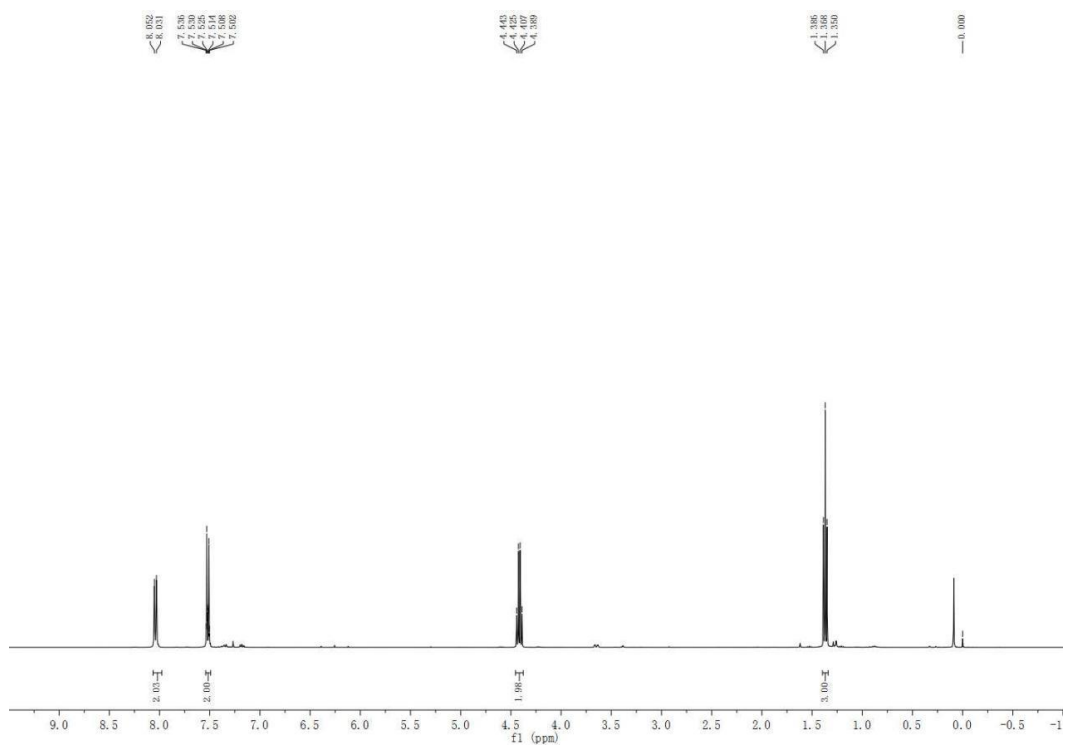

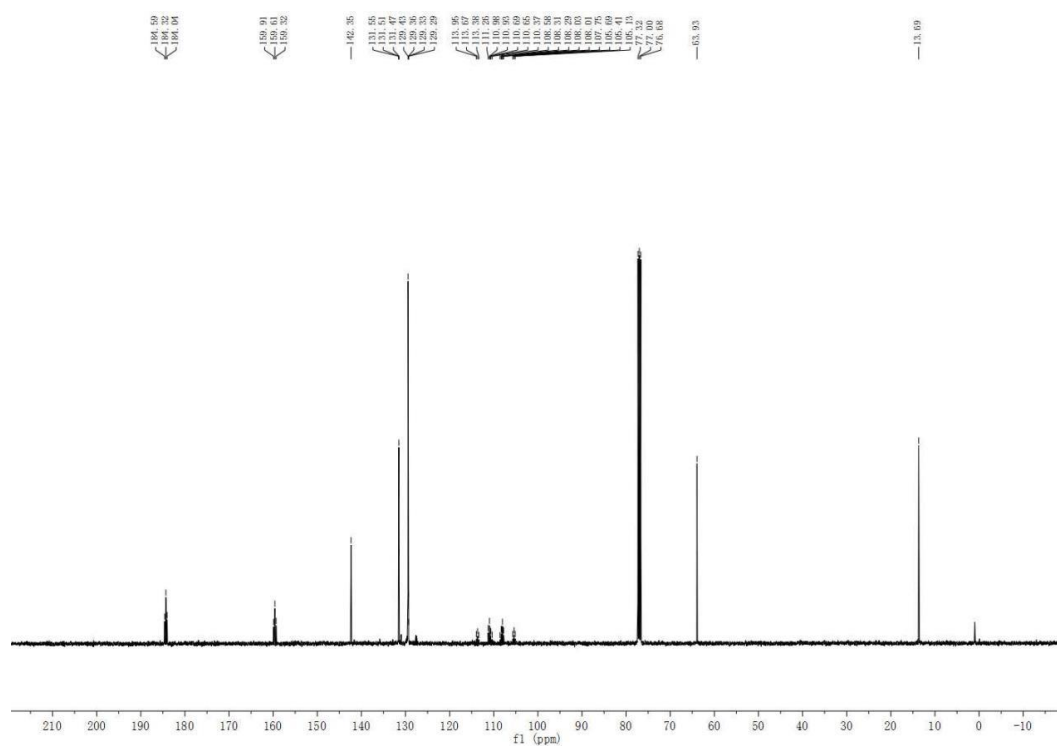

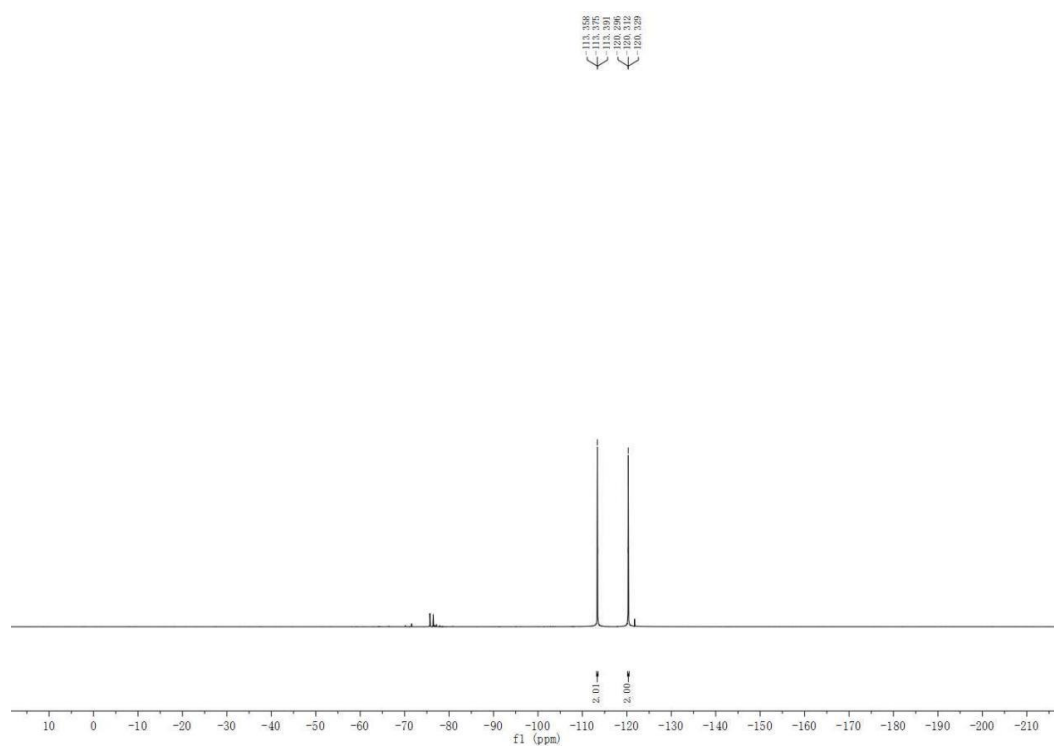

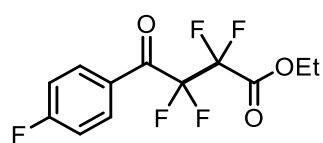

**3ah**

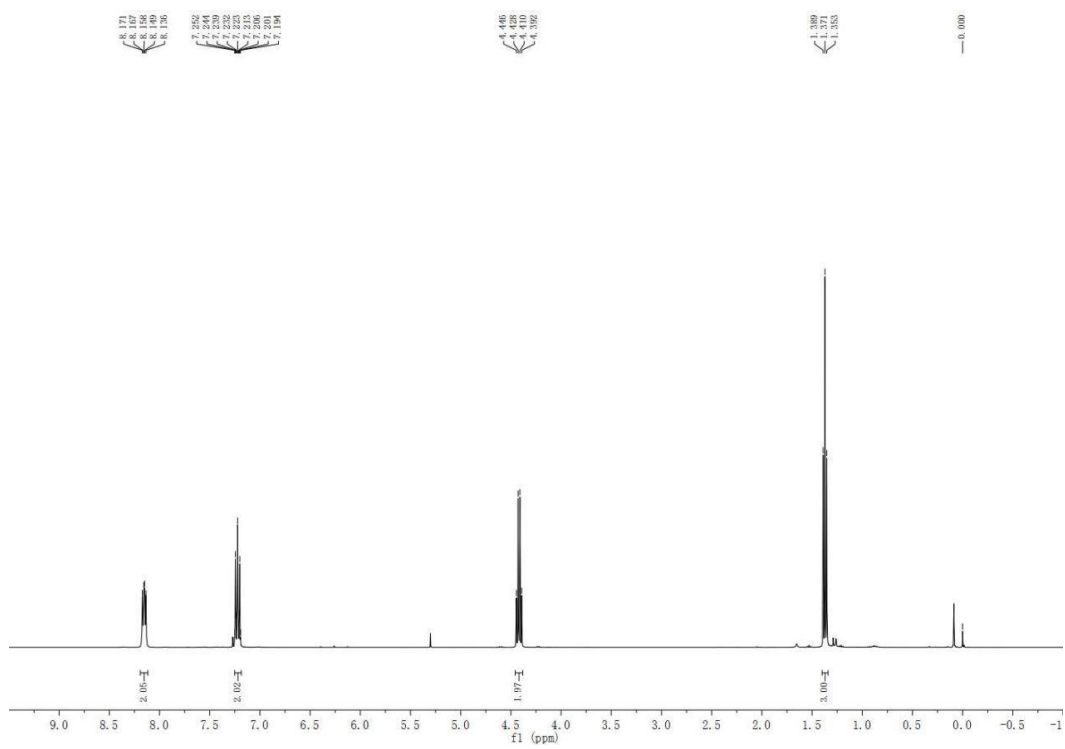

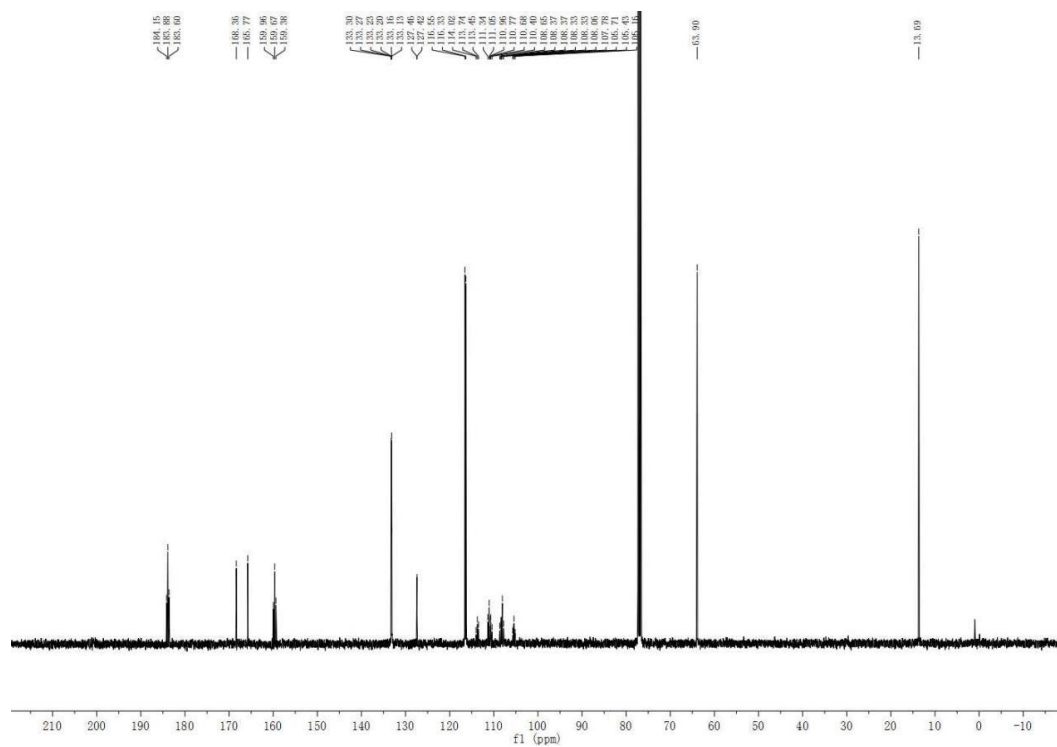

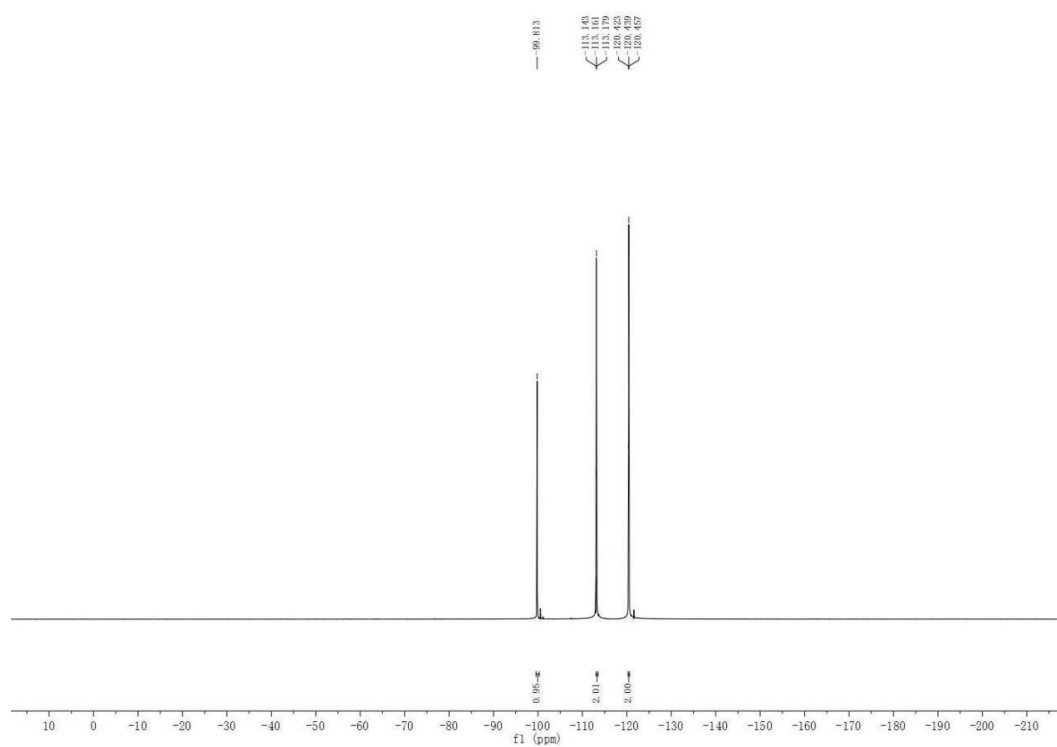

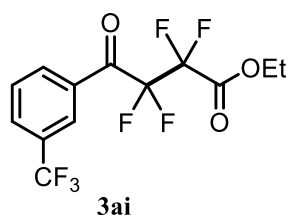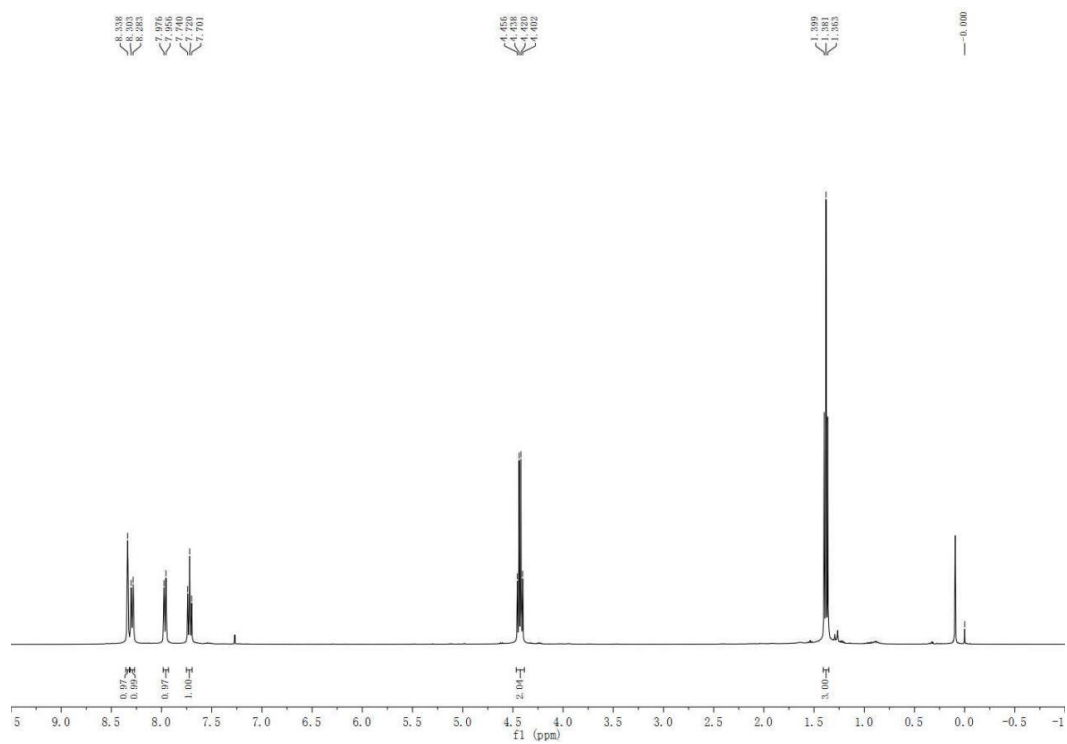

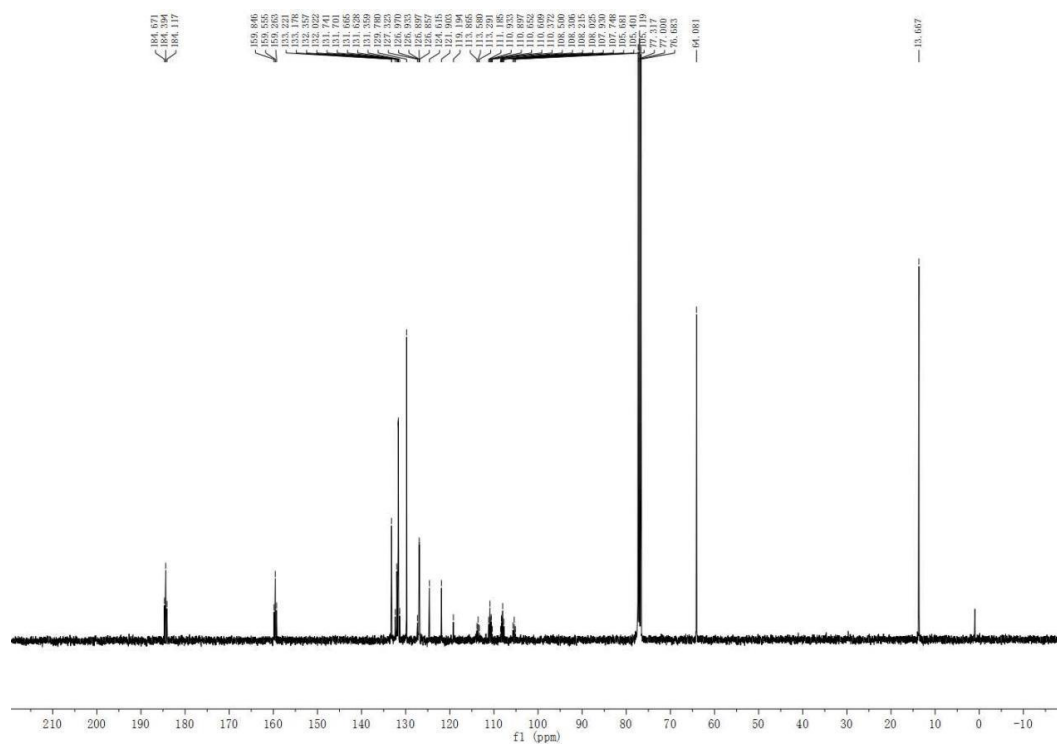

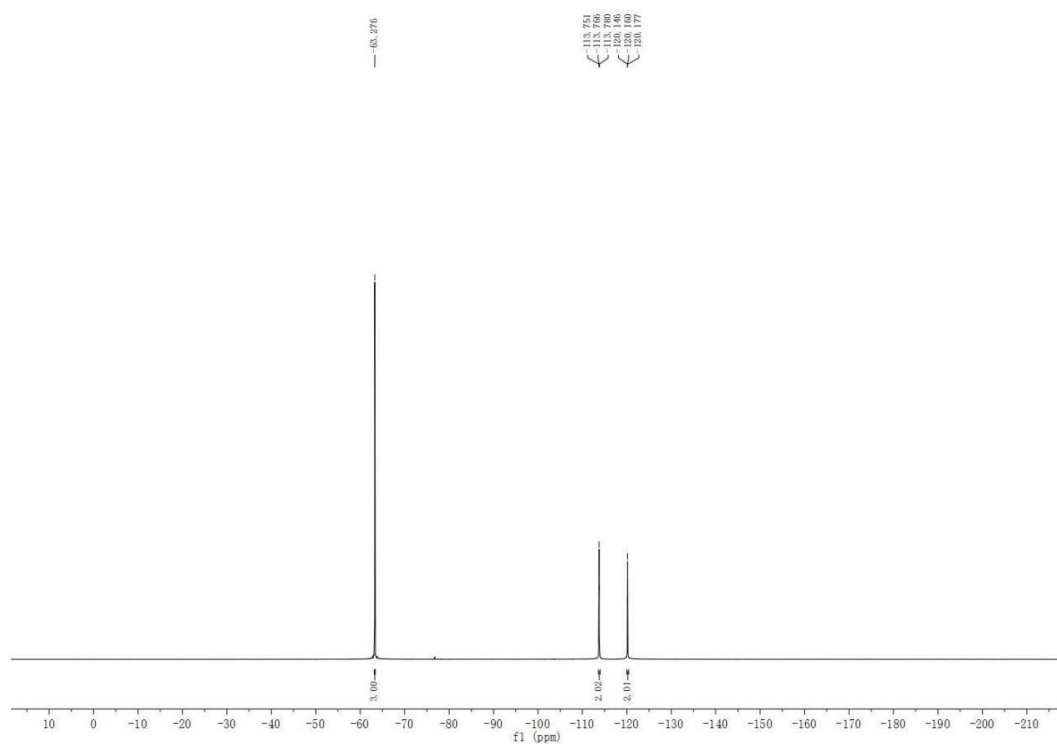

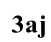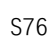

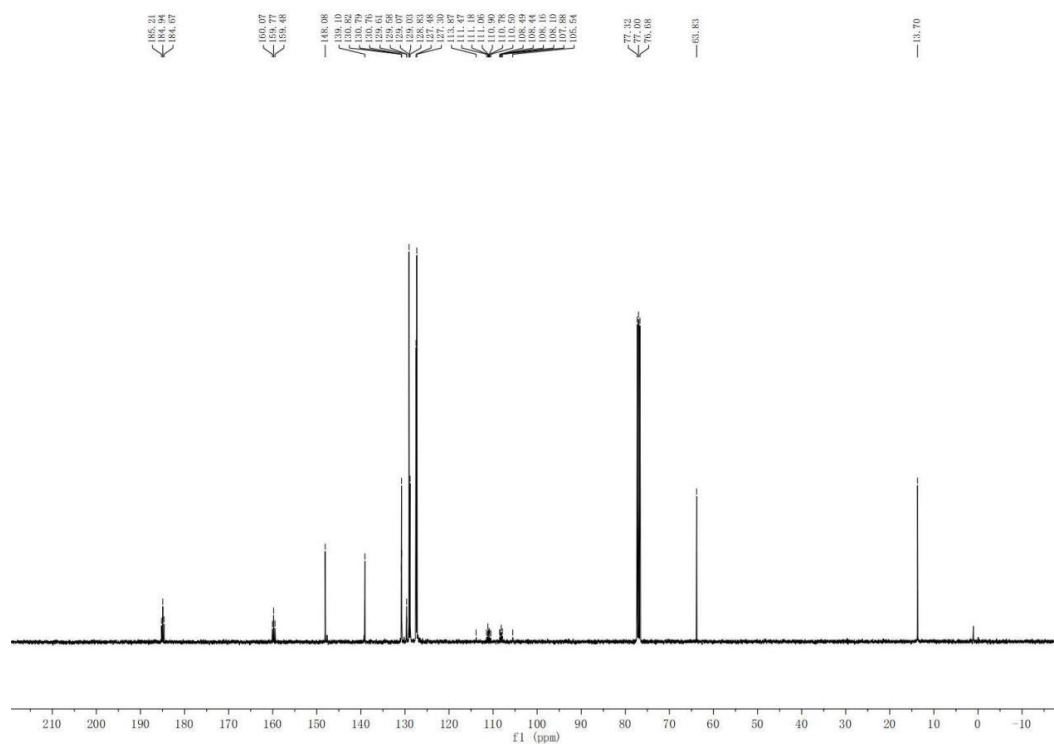

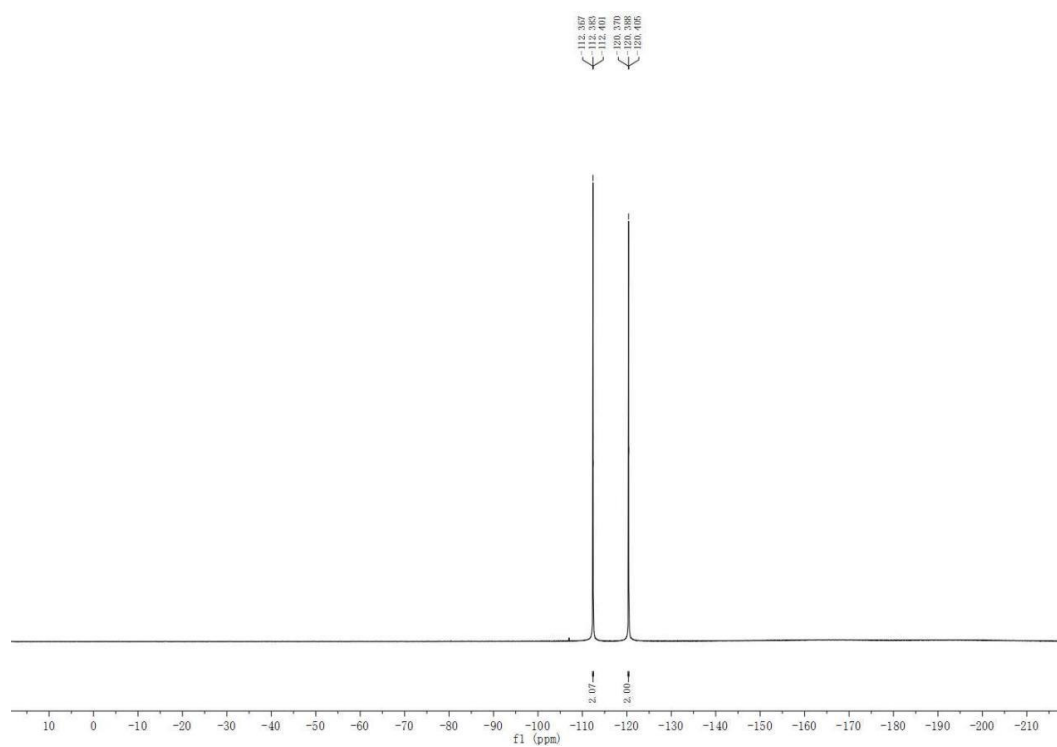

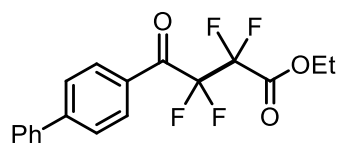

**3ak**

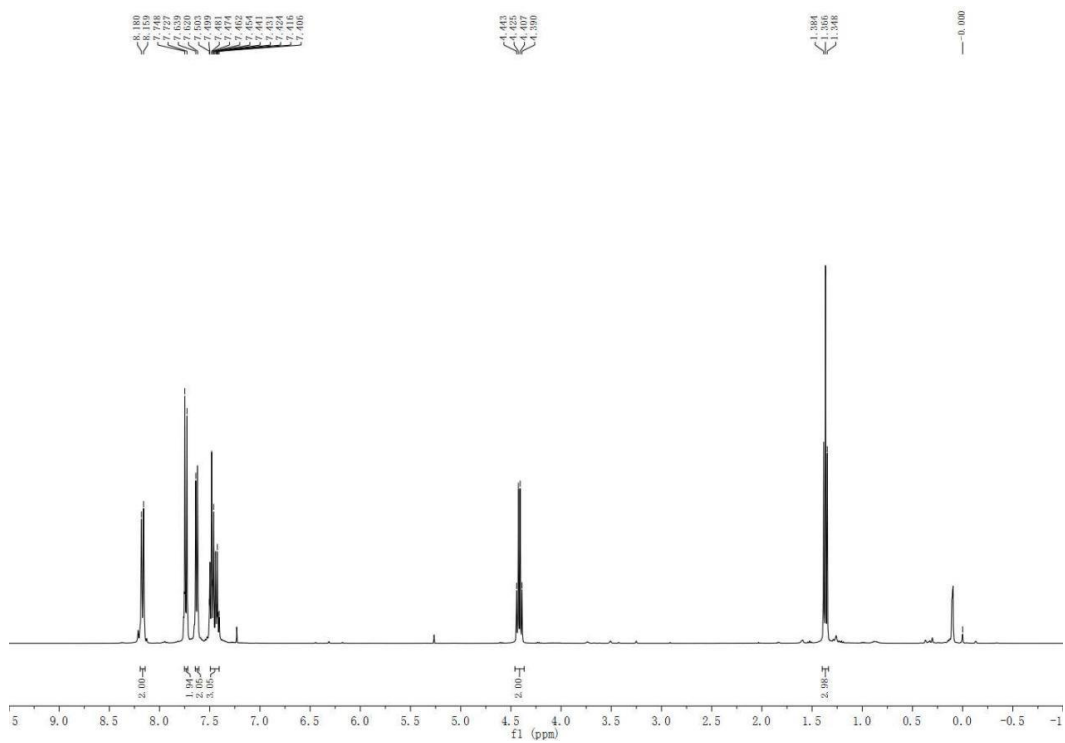

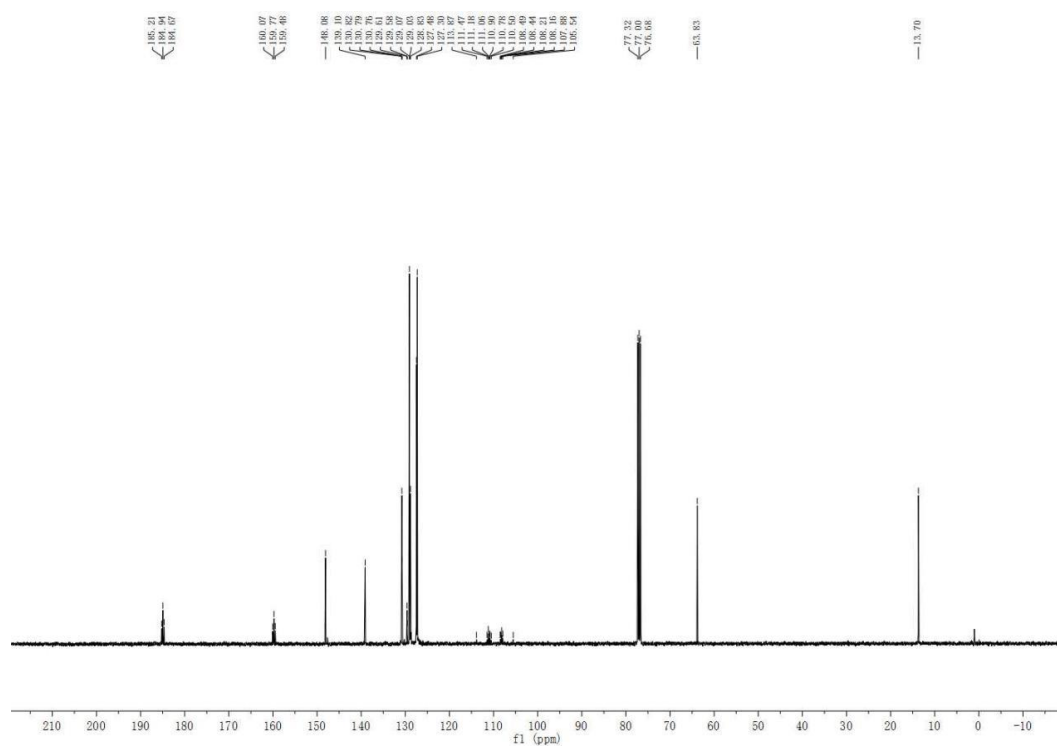

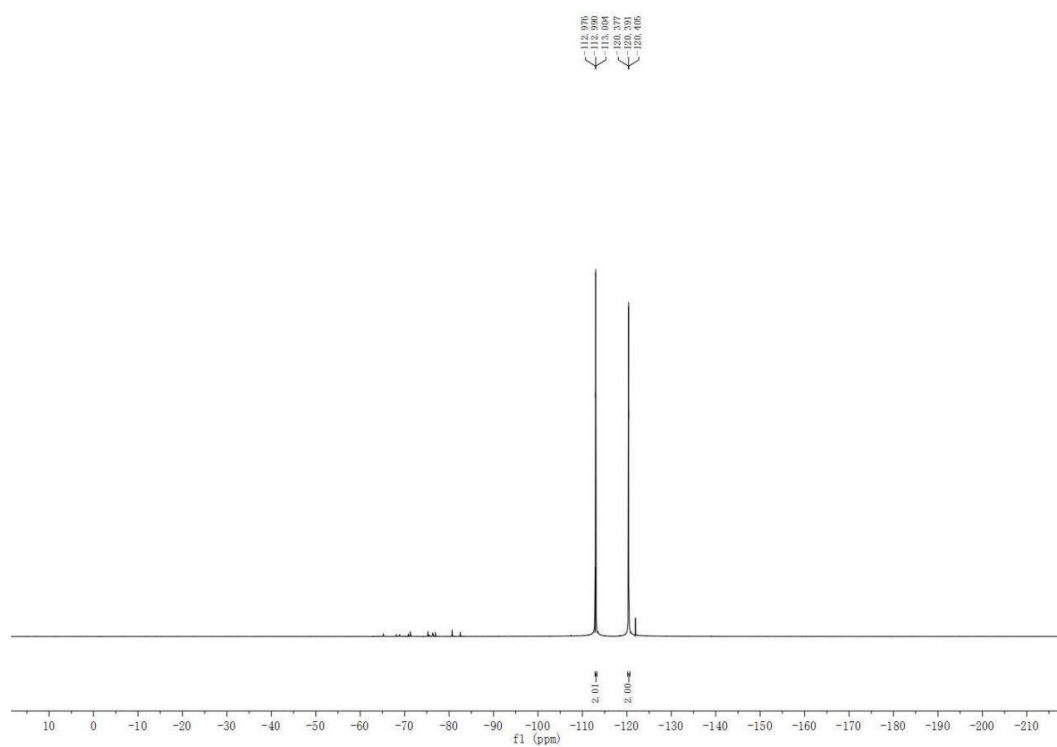

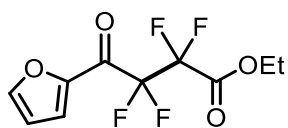

**3al**

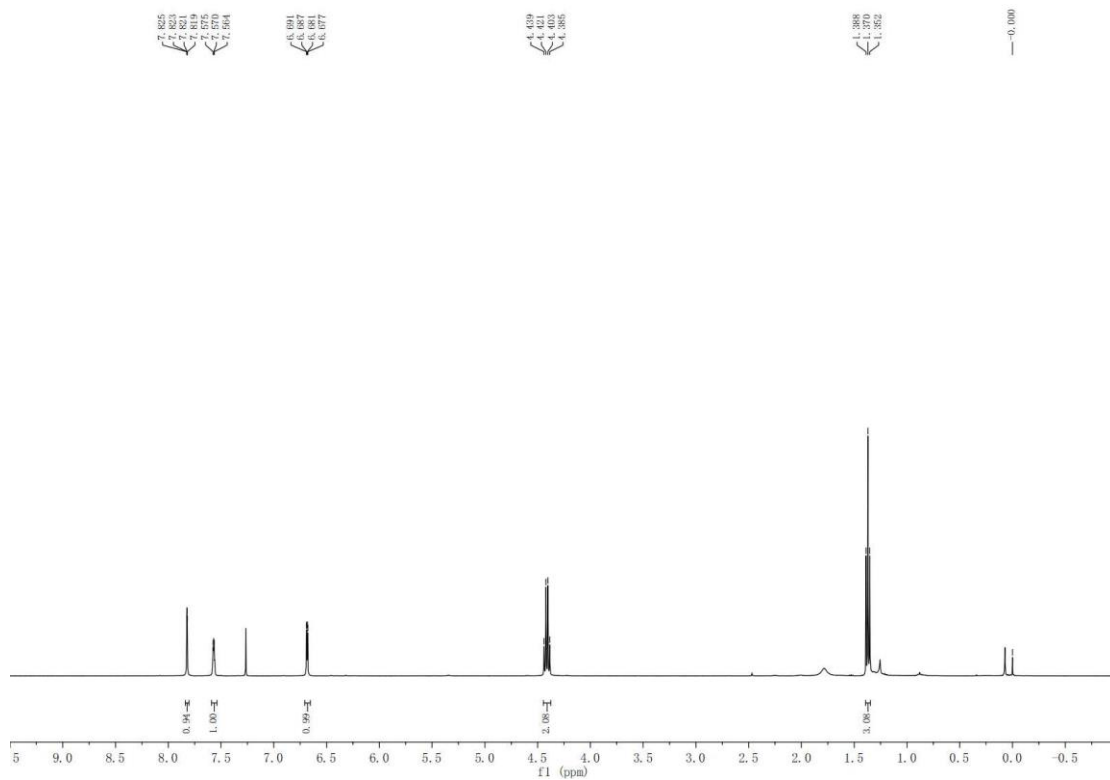

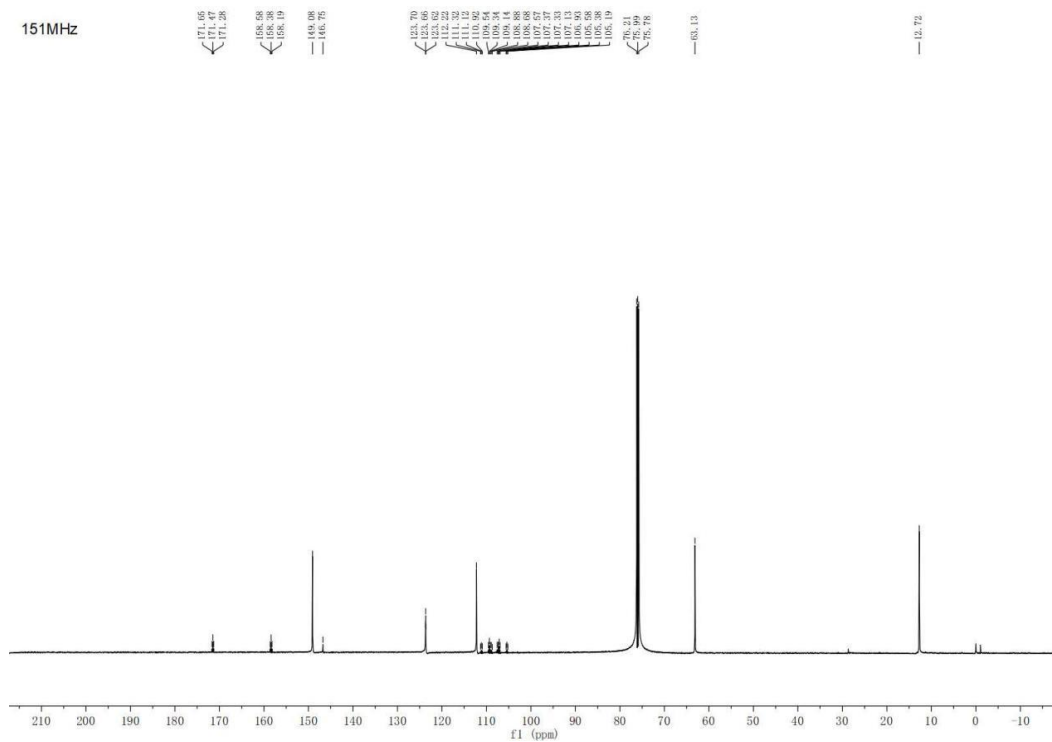

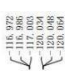

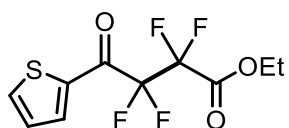

**3am**

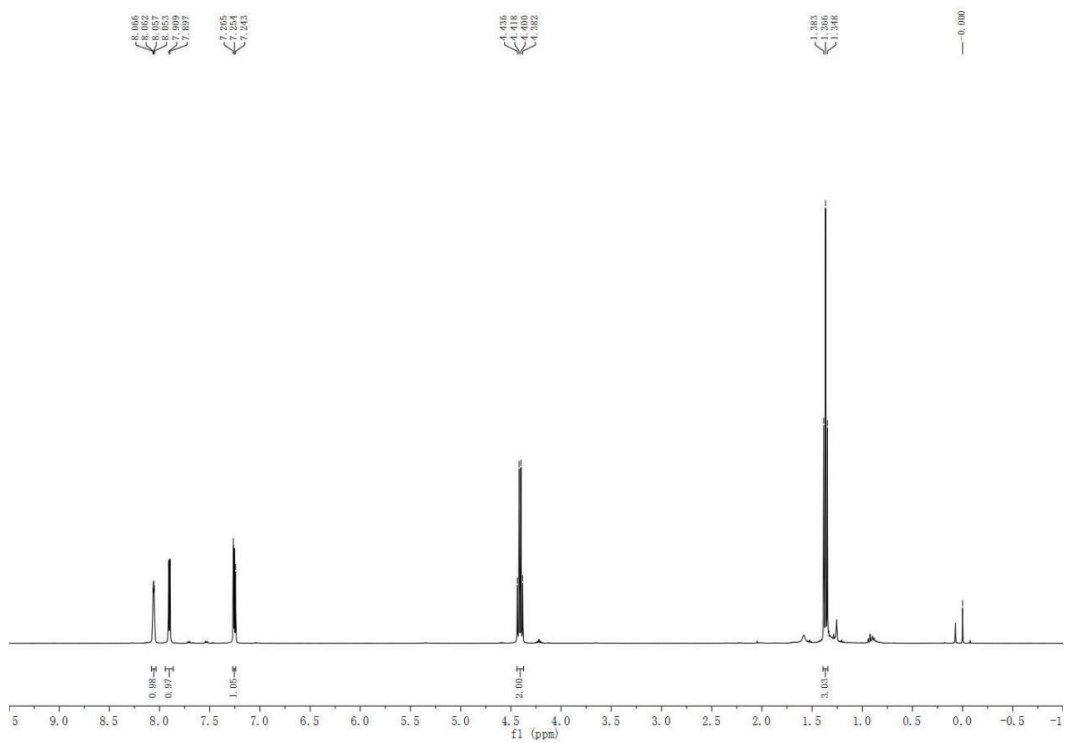

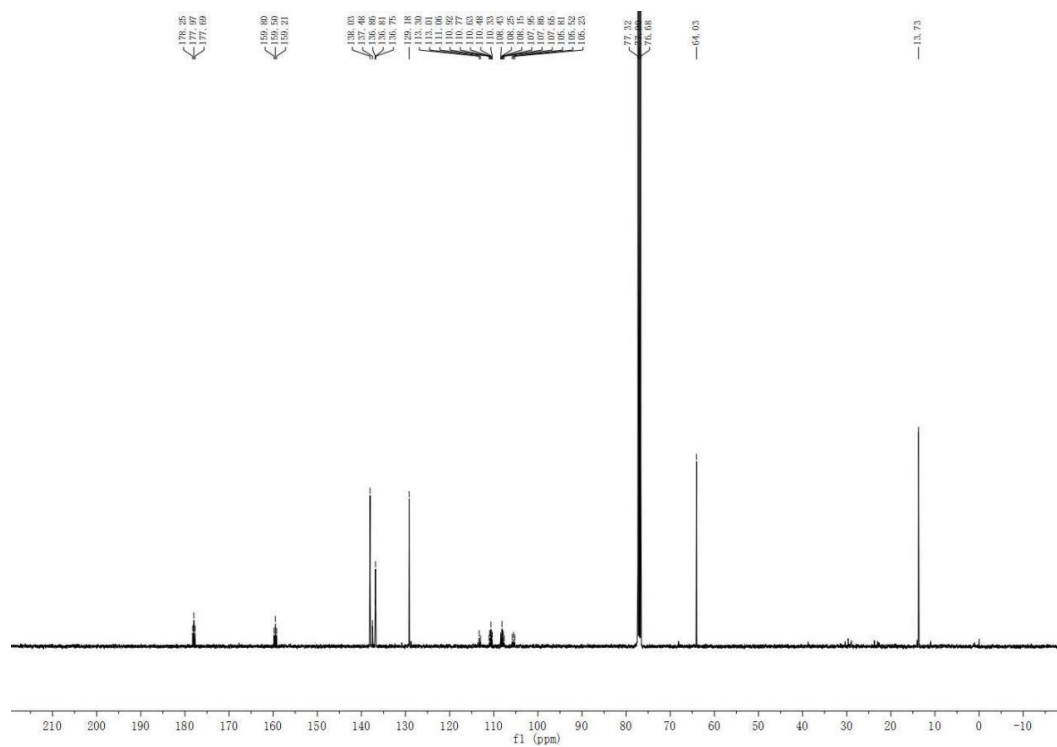

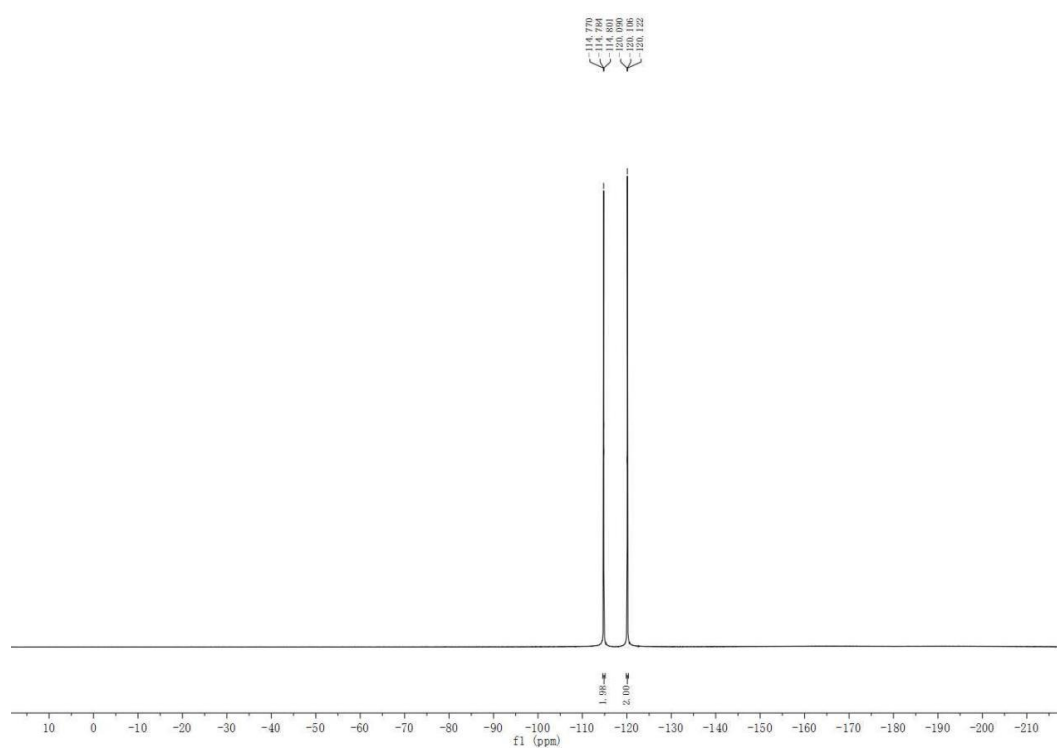

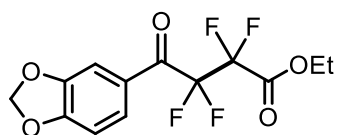

**3an**

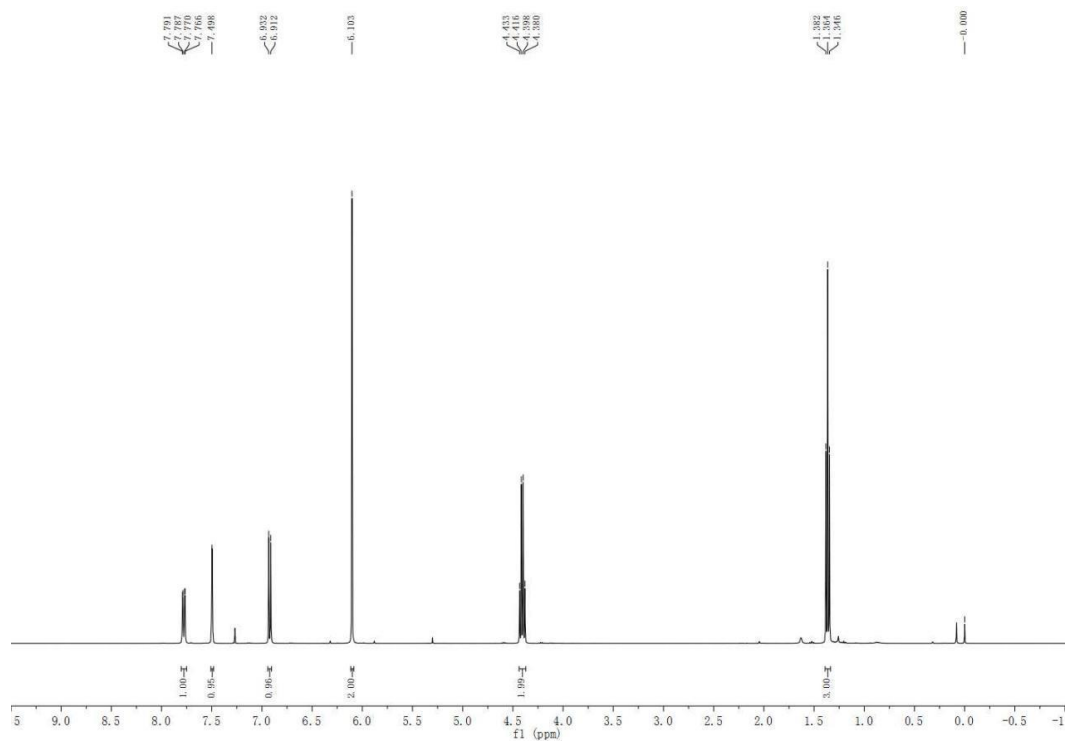

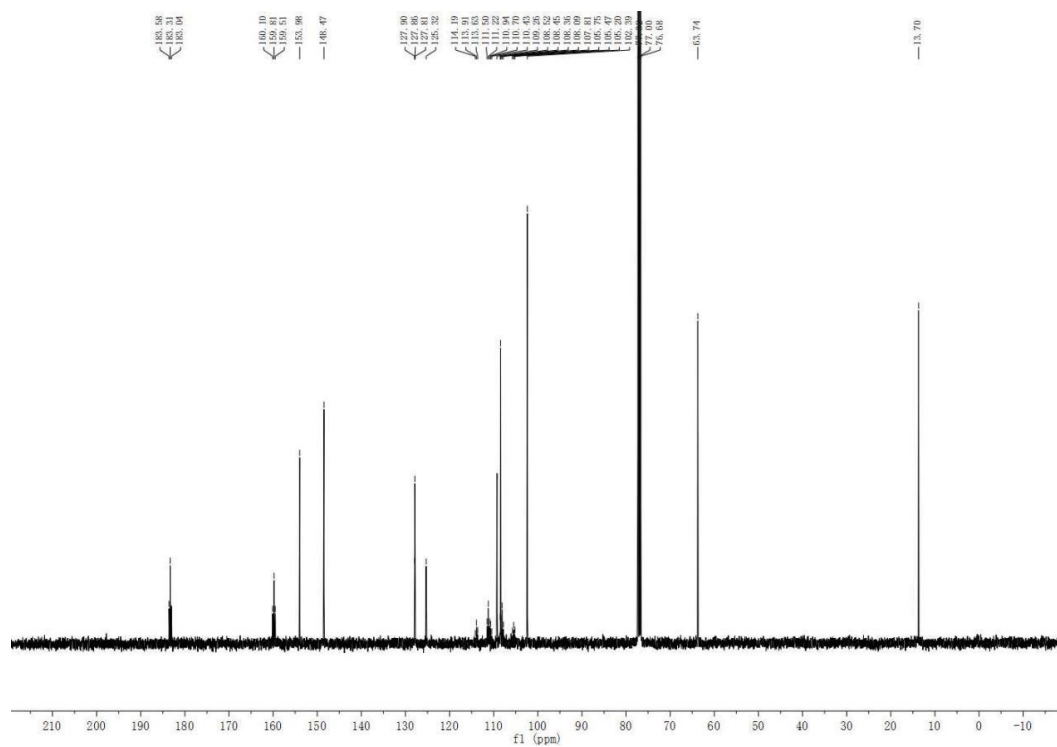

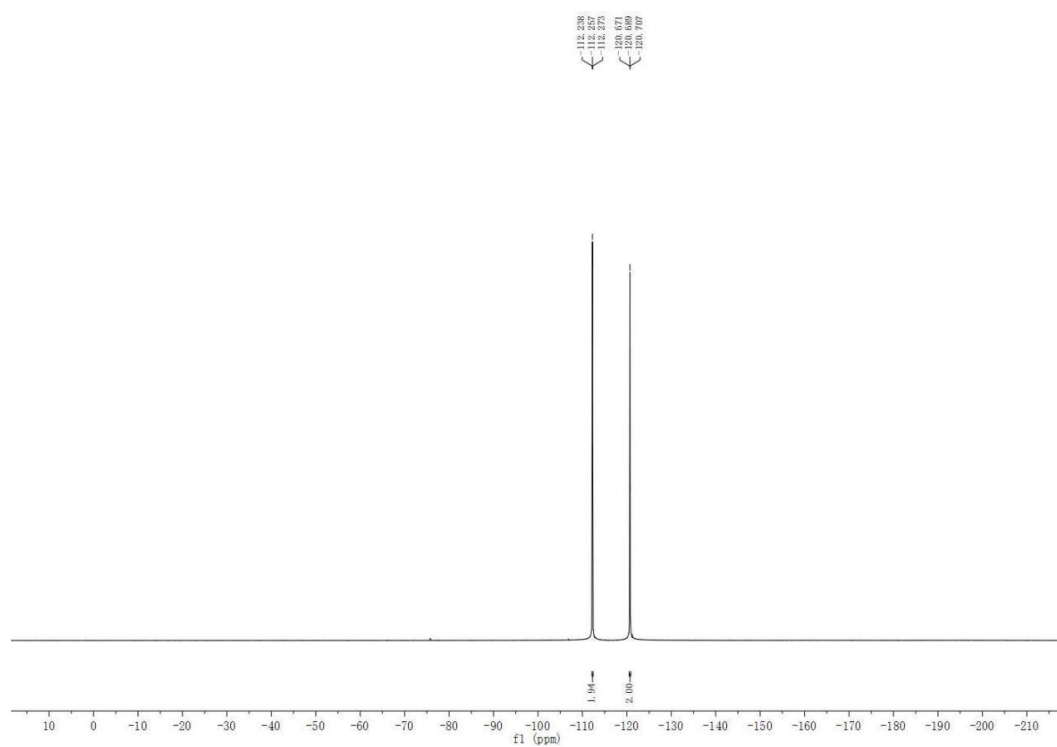

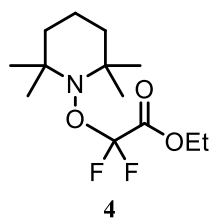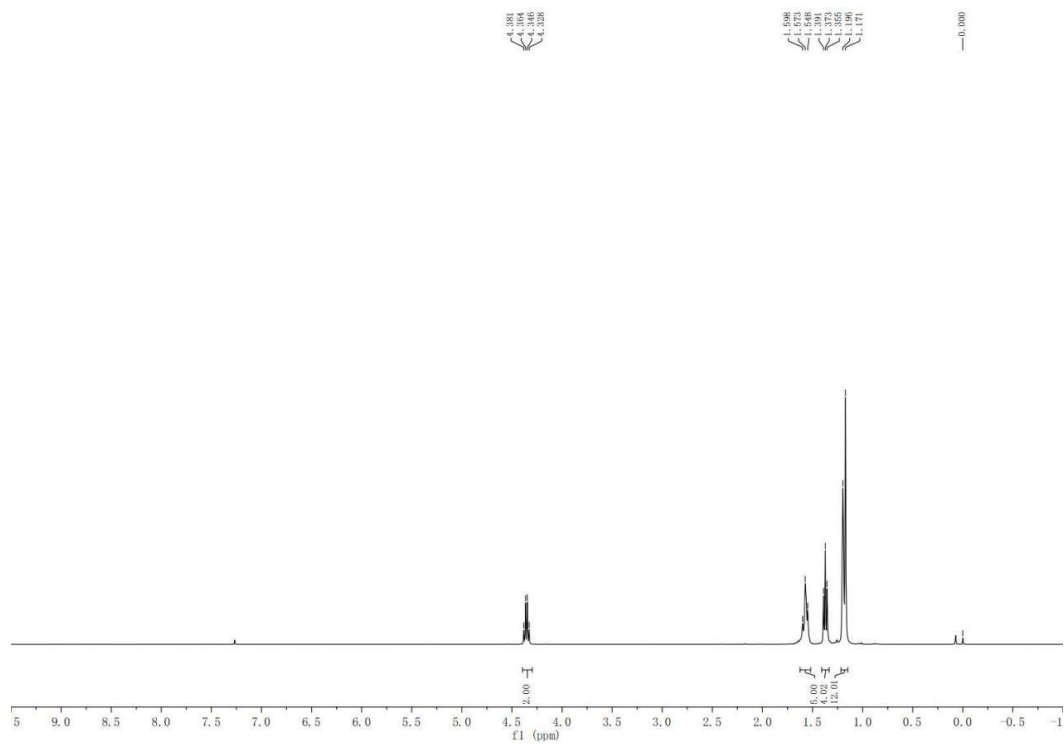

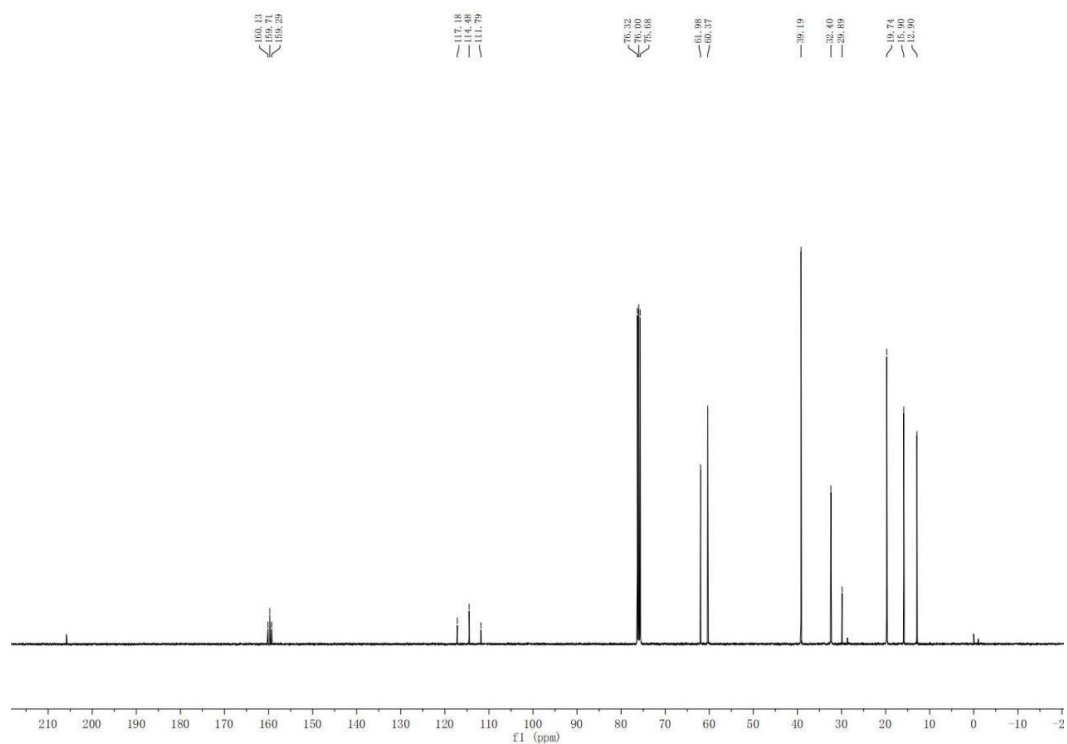

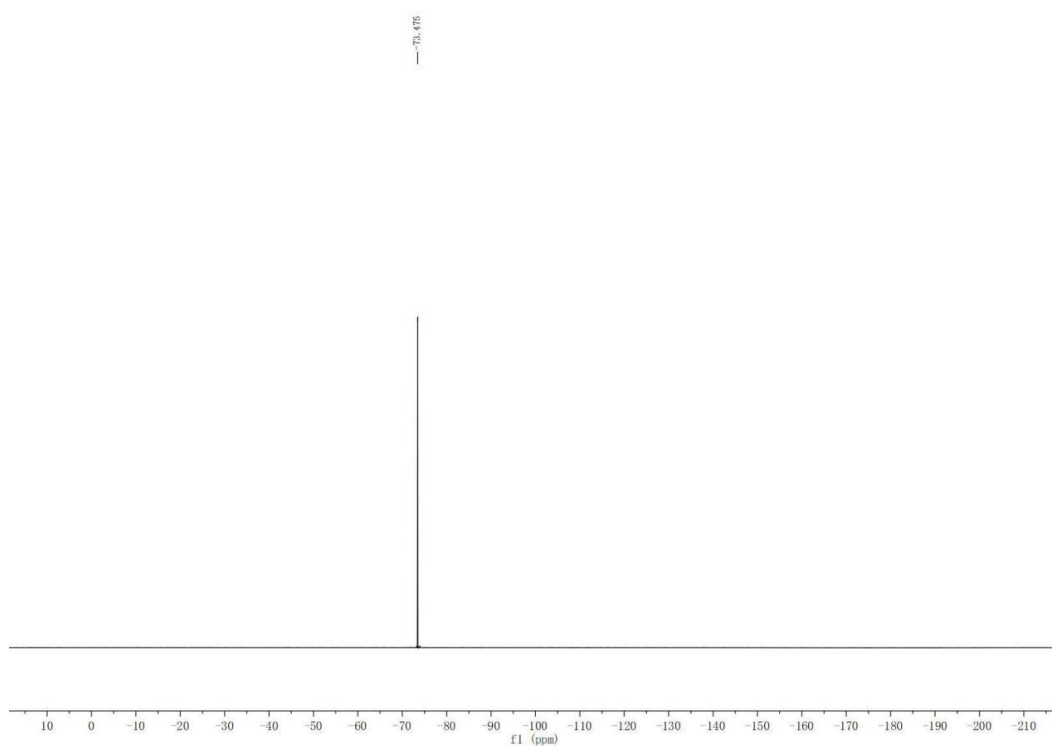

Supplement: d1ob01530c1.pdf [file d1ob01530c1.pdf]
